# Supplementary material for: The Blood Exposome and Its Role in Discovering Causes of Disease
Source: PubMed Central journal article supplement (PMC4123034; doi:10.1289/ehp.1308015), 2014-03-21
Supplement: ehp.1308015.s001.pdf [file ehp.1308015.s001.pdf]

**SUPPLEMENTAL MATERIAL**

**The Blood Exposome and Its Role in Discovering Causes of Disease**

Stephen M. Rappaport, Dinesh K. Barupal, David Wishart, Paolo Vineis, and Augustin Scalbert

**Table S1.** Database of 1,561 chemicals measured in blood from normal human populations.

Concentrations of chemicals were compiled from the Human Metabolome Database (HMDB) and the U.S. National Health and Nutrition Examination Survey (NHANES) as described below. If multiple entries were obtained for the same chemical, chemical-specific geometric mean values were estimated.

**HMDB chemicals**, accessed on 4/15/13 at <http://www.hmdb.ca>, included 3,426 entries designated as ‘Normal Blood Concentration Entries’ from ‘Adults’ of either or both sexes (there were multiple entries for some chemicals). Each entry was a mean blood concentration (micromolar) over all subjects in the reported sample. Some chemicals with extremely high blood concentrations were removed (water, oxygen, carbon dioxide, bromide, iodide, chloride, sulfide and Fe<sup>2+</sup>) as were chemicals with concentrations either missing or reported as ‘less than’ some value. Upon examination of data and references, some additional entries were removed [acetone, alpha-cholesterol, formaldehyde, one unrealistic entry for methanol (468 mM) and several series of structurally similar glycerolipids, glycerophospholipids and sphingolipids with identical concentration values. Each entry was examined independently by two of the authors to determine the most relevant source category, which sometimes differed from the ‘Origin’ field in HMDB. If a HMDB chemical was the same as listed in the NHANES database, it was deleted. This left a total of 2,519 entries for 1,451 chemicals.

**NHANES chemicals** included 135 entries for ‘Environmental Chemicals’ (designated as ‘pollutants’ in our analyses) and 44 entries for ‘Nutrients’ (designated as ‘food chemicals’) yielding a total of 179 entries (CDC 2009, 2012, 2013). Each entry was either a geometric mean (if provided) or median concentration measured in serum or blood from all subjects (combined for gender, race and age, designated by NHANES as ‘Total’) during one year, except for 1,4-

dichlorobenzene that was reported for Mexican Americans only. (Chemicals without reported geometric mean or median values were excluded). Concentrations of a given chemical that were measured in different years were listed as separate entries. All chemicals were measured in adult populations except the following nutrients that included infants and/or children as well as adults: folate, pyridoxal-5'-phosphate, 4-pyridoxic acid, vitamin B12, methylmalonic acid, vitamin C, vitamin A, retinyl palmitate, vitamin E, gamma-tocopherol, alpha-carotene, trans-beta-carotene, beta-cryptoxanthin, lutein/zeaxanthin, trans-lycopene, lycopene (total) and 25-hydroxyvitamin D. The following fatty acids were renamed: docosanoic acid (22:0) to behenic acid, lignoceric acid (24:0) to tetracosanoic acid, docosenoic acid (22:1n-9) to erucic acid, homo-gamma-linolenic acid (20:3n-6) to 8,11,14 eicosatrienoic acid, and docosatetranoic acid (22:4n-6) to adrenic acid. The final dataset included 179 entries for 110 chemicals. Blood concentrations were converted to micromolar values assuming 1.025 g serum/ml and 0.0065 g lipid/g serum, as needed.

**Variables:**

PC\_CID, PubChem ID

Chemical, chemical name

Dataset, (HMDB or NHANES)

Source, exposure source (Endo=endogenous, Drug=drug, Food=food, Pollut=pollutant)

Concentration ( $\mu\text{M}$ ), geometric mean blood (or serum/plasma) concentration,  $\mu\text{M}$ , across studies

No. studies, number of studies (or NHANES years) that contributed data for estimating the blood concentration

Class, chemical class

PubMed, number of NCBI PubMed citations to risk factors for chronic diseases (respiratory, cardiovascular, cancer and diabetes)

Biosys, number of NCBI Biosys human metabolic pathways

CAS, chemical abstract service registry number

## References

- CDC. 2009. Fourth national report on human exposure to environmental chemicals. Atlanta, GA:National Center for Environmental Health, Centers for Disease Control and Prevention.
- CDC. 2012. Second national report on biochemical indicators of diet and nutrition in the u.S. Population. Atlanta, Georgia:National Center for Environmental Health, Centers for Disease Control.
- CDC. 2013. Fourth national report on human exposure to environmental chemicals, updated tables. Atlanta, GA:National Center for Environmental Health, Centers for Disease Control and Prevention.

**Table S1.** Database of 1,561 chemicals measured in blood from normal human populations.

| PC_CID   | Chemical                                                                       | Dataset | Source | Concentration ( $\mu\text{M}$ ) | No. studies | Class                             | PubMed | Biosys | CAS         |
|----------|--------------------------------------------------------------------------------|---------|--------|---------------------------------|-------------|-----------------------------------|--------|--------|-------------|
| 92135    | (R)-3-Hydroxybutyric acid                                                      | HMDB    | Endo   | 48.9990054                      | 3           | Hydroxy Acids and Derivatives     | 0      | 10     | 625-72-9    |
| 11217234 | (R)-3-Hydroxyisobutyric acid                                                   | HMDB    | Endo   | 20.99952881                     | 1           | Hydroxy Acids and Derivatives     | 0      | 0      | 1910-47-0   |
| 54456    | (R)-Salsolinol                                                                 | HMDB    | Endo   | 0.000961227                     | 2           | Isoquinolines                     | 0      | 0      | 525-72-4    |
| 150929   | (S)-3,4-Dihydroxybutyric acid                                                  | HMDB    | Endo   | 18.00050837                     | 1           | Hydroxy Acids and Derivatives     | 0      | 0      | 51267-44-8  |
| 94318    | (S)-3-Hydroxybutyric acid                                                      | HMDB    | Endo   | 19.99935454                     | 1           | Hydroxy Acids and Derivatives     | 0      | 0      | 6168-83-8   |
| 440873   | (S)-3-Hydroxyisobutyric acid                                                   | HMDB    | Endo   | 20.99952881                     | 1           | Hydroxy Acids and Derivatives     | 0      | 2      | 2068-83-9   |
| 439434   | (S)-b-aminoisobutyric acid                                                     | HMDB    | Endo   | 1.030042435                     | 1           | Amino Acids and Derivatives       | 0      | 1      | 4249-19-8   |
| 163959   | 1-(alpha-Methyl-4-(2-methylpropyl)benzeneacetate)-beta-D-Glucopyranuronic acid | HMDB    | Drug   | 12.99935837                     | 1           | Prenol Lipids                     | 0      | 0      | 115075-59-7 |
| 4091     | 1,1-Dimethylbiguanide                                                          | HMDB    | Drug   | 6.00024319                      | 1           | Guanidines                        | 163    | 6      | 657-24-9    |
| 428      | 1,3-Diaminopropane                                                             | HMDB    | Endo   | 0.039999033                     | 1           | Alkylamines                       | 0      | 7      | 109-76-2    |
| 4685     | 1,4-Dichlorobenzene                                                            | NHANES  | Pollut | 0.002754553                     | 3           | Aromatic Homomonocyclic Compounds | 0      | 1      | 106-46-7    |
| 64960    | 1,5-Anhydrosorbitol                                                            | HMDB    | Endo   | 149.994706                      | 1           | Monosaccharides                   | 5      | 11     | 154-58-5    |
| 5282259  | 10-Nitrolinoleic acid                                                          | HMDB    | Endo   | 0.079000587                     | 1           | Lineolic Acids and Derivatives    | 0      | 0      | 774603-04-2 |
| 5283168  | 11(R)-HETE                                                                     | HMDB    | Endo   | 0.018854569                     | 4           | Eicosanoids                       | 0      | 1      | 73347-43-0  |
| 5283146  | 11,12-DiHETrE                                                                  | HMDB    | Endo   | 0.022308221                     | 4           | Eicosanoids                       | 0      | 8      | 192461-95-3 |
| 53480479 | 11,12-EpETrE                                                                   | HMDB    | Endo   | 0.045411041                     | 3           | Eicosanoids                       | 0      | 0      | .           |
| 101788   | 11b-Hydroxyprogesterone                                                        | HMDB    | Endo   | 1.99996E-05                     | 1           | Steroids and Steroid Derivatives  | 0      | 1      | 600-57-7    |
| 5280886  | 11b-PGF2a                                                                      | HMDB    | Endo   | 0.000178147                     | 2           | Eicosanoids                       | 0      | 5      | .           |
| 5280891  | 11-Dehydro-thromboxane B2                                                      | HMDB    | Endo   | 0.0027496                       | 2           | Eicosanoids                       | 13     | 7      | 67910-12-7  |
| 11954058 | 11H-14,15-EETA                                                                 | HMDB    | Endo   | 0.884528981                     | 2           | Fatty Acids and Conjugates        | 0      | 2      | 219535-29-2 |
| 5283134  | 11-trans-Leukotriene C4                                                        | HMDB    | Endo   | 8.99987E-06                     | 1           | Peptides                          | 0      | 0      | 74841-69-3  |
| 53481695 | 11Z-Octadecenylcarnitine                                                       | HMDB    | Endo   | 0.10999724                      | 1           | Fatty Acid Esters                 | 0      | 0      | .           |
| 5283007  | 12(13)Ep-9-KODE                                                                | HMDB    | Endo   | 3.458379062                     | 2           | Fatty Acids and Conjugates        | 0      | 0      | .           |
| 5280892  | 12(S)-HPETE                                                                    | HMDB    | Endo   | 1.450052844                     | 1           | Eicosanoids                       | 0      | 7      | 71774-10-2  |
| 10236635 | 12,13-DHOME                                                                    | HMDB    | Endo   | 0.247115362                     | 4           | Fatty Acids and Conjugates        | 0      | 1      | .           |
| 16061067 | 12,13-DiHODE                                                                   | HMDB    | Endo   | 0.218996397                     | 1           | Lineolic Acids and Derivatives    | 0      | 0      | .           |
| 5356421  | 12,13-EpOME                                                                    | HMDB    | Endo   | 0.63419424                      | 3           | Fatty Acids and Conjugates        | 0      | 0      | .           |

| PC_CID   | Chemical                               | Dataset | Source | Concentration ( $\mu\text{M}$ ) | No. studies | Class                            | PubMed | Biosys | CAS                                           |
|----------|----------------------------------------|---------|--------|---------------------------------|-------------|----------------------------------|--------|--------|-----------------------------------------------|
| 10041593 | 12-HEPE                                | HMDB    | Endo   | 0.035465319                     | 4           | Eicosanoids                      | 0      | 0      | 74838-73-6,109430-12-8,116180-17-7,81187-21-5 |
| 5283155  | 12-HETE                                | HMDB    | Endo   | 0.287681878                     | 5           | Eicosanoids                      | 0      | 11     | 54397-83-0                                    |
| 5283141  | 12S-HHT                                | HMDB    | Endo   | 0.00203004                      | 1           | Fatty Alcohols                   | 0      | 4      | 54397-84-1                                    |
| 161273   | 13,14-Dihydro PGE1                     | HMDB    | Endo   | 2.79998E-06                     | 1           | Eicosanoids                      | 0      | 0      | 19313-28-1                                    |
| 5283039  | 13,14-Dihydro-15-keto PGF2a            | HMDB    | Endo   | 0.000193913                     | 2           | Eicosanoids                      | 1      | 4      | 27376-76-7                                    |
| 5280711  | 13,14-Dihydro-15-keto-PGE2             | HMDB    | Endo   | 0.000340839                     | 4           | Eicosanoids                      | 0      | 4      | 363-23-5                                      |
| 5282379  | 13-cis-Retinoic acid                   | HMDB    | Endo   | 0.003000129                     | 1           | Prenol Lipids                    | 6      | 0      | 4759-48-2,97950-17-9                          |
| 10469728 | 13-HOTE                                | HMDB    | Endo   | 0.158833309                     | 3           | Lineolic Acids and Derivatives   | 0      | 0      | .                                             |
| 5280720  | 13-L-Hydroperoxylinoleic acid          | HMDB    | Endo   | 6.009851263                     | 1           | Lineolic Acids and Derivatives   | 0      | 2      | 33964-75-9                                    |
| 6446027  | 13-OxoODE                              | HMDB    | Endo   | 0.066324229                     | 4           | Lineolic Acids and Derivatives   | 0      | 1      | 54739-30-9                                    |
| 6443013  | 13S-hydroxyoctadecadienoic acid        | HMDB    | Endo   | 1.609623016                     | 4           | Lineolic Acids and Derivatives   | 0      | 9      | 5204-88-6                                     |
| 16061119 | 14,15-DiHETE                           | HMDB    | Endo   | 0.024409082                     | 2           | Eicosanoids                      | 0      | 0      | .                                             |
| 5283147  | 14,15-DiHETrE                          | HMDB    | Endo   | 0.029537342                     | 4           | Eicosanoids                      | 0      | 8      | 77667-09-5                                    |
| 16061088 | 14,15-EpETE                            | HMDB    | Endo   | 0.005366389                     | 2           | Fatty Acids and Conjugates       | 0      | 0      | .                                             |
| 5353279  | 14,15-Epoxy-5,8,11-eicosatrienoic acid | HMDB    | Endo   | 0.000484254                     | 2           | Fatty Acids and Conjugates       | 0      | 13     | 81276-03-1                                    |
| 5283201  | 14R,15S-EpETrE                         | HMDB    | Endo   | 0.000133996                     | 1           | Eicosanoids                      | 0      | 0      | 98103-48-1                                    |
| 16061062 | 15(16)-EpODE                           | HMDB    | Endo   | 0.309406294                     | 3           | Fatty Acids and Conjugates       | 0      | 0      | .                                             |
| 5280724  | 15(S)-HETE                             | HMDB    | Endo   | 0.073138527                     | 7           | Eicosanoids                      | 0      | 6      | 54845-95-3                                    |
| 5280893  | 15(S)-HPETE                            | HMDB    | Endo   | 1.060032958                     | 1           | Eicosanoids                      | 0      | 9      | 70981-96-3                                    |
| 5283145  | 15(S)-Hydroxyeicosatrienoic acid       | HMDB    | Endo   | 0.051257158                     | 3           | Eicosanoids                      | 0      | 0      | 13-16-1                                       |
| 16061068 | 15,16-DiHODE                           | HMDB    | Endo   | 1.076268537                     | 3           | Lineolic Acids and Derivatives   | 0      | 0      | .                                             |
| 5311211  | 15-Deoxy-d-12,14-PGJ2                  | HMDB    | Endo   | 0.001521437                     | 3           | Eicosanoids                      | 0      | 1      | 87893-55-8                                    |
| 53480357 | 15-HEPE                                | HMDB    | Endo   | 0.012674033                     | 4           | Eicosanoids                      | 0      | 0      | 97850-14-1                                    |
| 5280701  | 15-KETE                                | HMDB    | Endo   | 0.012746482                     | 4           | Fatty Acids and Conjugates       | 0      | 5      | 81416-72-0                                    |
| 5283042  | 15-Keto-13,14-dihydroprostaglandin A2  | HMDB    | Endo   | 0.000129997                     | 1           | Eicosanoids                      | 0      | 0      | 74872-89-2                                    |
| 5280719  | 15-Keto-prostaglandin E2               | HMDB    | Endo   | 0.000599989                     | 1           | Eicosanoids                      | 0      | 5      | 26441-05-4                                    |
| 5280887  | 15-Keto-prostaglandin F2a              | HMDB    | Endo   | 0.000198227                     | 2           | Eicosanoids                      | 0      | 5      | 35850-13-6                                    |
| 14392758 | 16(17)-EpDPE                           | HMDB    | Endo   | 0.009377895                     | 2           | Fatty Acids and Conjugates       | 0      | 0      | .                                             |
| 9548884  | 16(R)-HETE                             | HMDB    | Endo   | 0.000276998                     | 1           | Eicosanoids                      | 0      | 1      | .                                             |
| 115116   | 16a-Hydroxyestrone                     | HMDB    | Endo   | 0.000780013                     | 1           | Steroids and Steroid Derivatives | 3      | 0      | 566-76-7                                      |
| 16061120 | 17,18-DiHETE                           | HMDB    | Endo   | 0.793818844                     | 3           | Eicosanoids                      | 0      | 0      | .                                             |

| PC_CID   | Chemical                                             | Dataset | Source | Concentration (µM) | No. studies | Class                            | PubMed | Biosys | CAS                            |
|----------|------------------------------------------------------|---------|--------|--------------------|-------------|----------------------------------|--------|--------|--------------------------------|
| 16061089 | 17,18-EpETE                                          | HMDB    | Endo   | 0.002852384        | 2           | Fatty Acids and Conjugates       | 0      | 0      | 131339-23-6                    |
| 68570    | 17a-Estradiol                                        | HMDB    | Endo   | 0.320010971        | 1           | Steroids and Steroid Derivatives | 0      | 3      | 57-91-0                        |
| 5991     | 17a-Ethynylestradiol                                 | HMDB    | Drug   | 0.000160006        | 1           | Steroids and Steroid Derivatives | 38     | 0      | 57-63-6,406932-93-2,77538-56-8 |
| 91451    | 17a-Hydroxypregnenolone                              | HMDB    | Endo   | 0.004242511        | 2           | Steroids and Steroid Derivatives | 0      | 9      | 387-79-1                       |
| 13783824 | 17-beta-estradiol-3-glucuronide                      | HMDB    | Endo   | 3.18587E-05        | 3           | Steroids and Steroid Derivatives | 0      | 0      | .                              |
| 6439179  | 17-HDoHE                                             | HMDB    | Endo   | 0.01224546         | 2           | Fatty Acids and Conjugates       | 0      | 0      | 90780-52-2                     |
| 6442740  | 17-HETE                                              | HMDB    | Endo   | 0.000113003        | 1           | Eicosanoids                      | 0      | 4      | 128914-47-6,183509-25-3        |
| 6442778  | 18-Hydroxyarachidonic acid                           | HMDB    | Endo   | 0.000273011        | 1           | Eicosanoids                      | 0      | 4      | 128656-74-6                    |
| 123655   | 18-Hydroxycortisol                                   | HMDB    | Endo   | 0.003289894        | 1           | Steroids and Steroid Derivatives | 0      | 0      | 864-27-7                       |
| 123712   | 18-Oxocortisol                                       | HMDB    | Endo   | 0.000827005        | 1           | Steroids and Steroid Derivatives | 0      | 0      | 2410-60-8                      |
| 53481496 | 18R-HEPE                                             | HMDB    | Endo   | 0.000137994        | 1           | Eicosanoids                      | 0      | 0      | .                              |
| 16061148 | 19,20-DiHDPA                                         | HMDB    | Endo   | 0.018734285        | 3           | Fatty Acids and Conjugates       | 0      | 0      | .                              |
| 128251   | 19-Norandrosterone                                   | HMDB    | Endo   | 0.560010357        | 1           | Steroids and Steroid Derivatives | 0      | 0      | 1225-01-0                      |
| 263      | 1-Butanol                                            | HMDB    | Endo   | 0.080002292        | 1           | Alcohols and Polyols             | 0      | 1      | 71-36-3                        |
| 27476    | 1-Methyladenosine                                    | HMDB    | Endo   | 0.099998509        | 1           | Purine Nucleosides and Analogues | 0      | 0      | 15763-06-1                     |
| 96373    | 1-Methylguanosine                                    | HMDB    | Endo   | 0.046000639        | 1           | Purine Nucleosides and Analogues | 0      | 0      | 2140-65-0                      |
| 3614     | 1-Methylhistamine                                    | HMDB    | Endo   | 0.000339988        | 1           | Azoles                           | 0      | 1      | 501-75-7                       |
| 92105    | 1-Methylhistidine                                    | HMDB    | Endo   | 11.43066893        | 6           | Amino Acids and Derivatives      | 0      | 0      | 332-80-9                       |
| 65095    | 1-Methylinosine                                      | HMDB    | Endo   | 0.065343324        | 5           | Purine Nucleosides and Analogues | 0      | 0      | 2140-73-0                      |
| 457      | 1-Methylnicotinamide                                 | HMDB    | Endo   | 0.42998713         | 1           | Pyridines and Derivatives        | 1      | 8      | 3106-60-3                      |
| 7408     | 1-Phenylethylamine                                   | HMDB    | Endo   | 0.013999971        | 1           | Phenylmethanamines               | 0      | 0      | 98-84-0                        |
| 18134    | 2-(N-Ethyl-perfluorooctane sulfonamido) acetic acid  | NHANES  | Pollut | 0.001045876        | 1           | Perfluorinated Compounds         | 0      | 0      | 1336-61-4                      |
| .        | 2-(N-Methyl-perfluorooctane sulfonamido) acetic acid | NHANES  | Pollut | 0.00065728         | 4           | Perfluorinated Compounds         | .      | .      | .                              |
| 225936   | 2,3-Butanediol                                       | HMDB    | Food   | 5.253528783        | 2           | Alcohols and Polyols             | 0      | 1      | 24347-58-8                     |
| 53477747 | 2,3-Dinor-6-keto-prostaglandin F1 a                  | HMDB    | Endo   | 3.80009E-05        | 1           | Keto-Acids and Derivatives       | 0      | 0      | .                              |
| 1491     | 2,4-Dihydroxybenzoic acid                            | HMDB    | Endo   | 0.13623145         | 8           | Benzoic Acid and Derivatives     | 0      | 0      | 89-86-1                        |
| 192742   | 2,4-Dihydroxybutanoic acid                           | HMDB    | Endo   | 1.999905641        | 1           | Hydroxy Acids and Derivatives    | 0      | 0      | 1518-62-3                      |



| PC_CID   | Chemical                                 | Dataset | Source | Concentration ( $\mu\text{M}$ ) | No. studies | Class                            | PubMed | Biosys | CAS                |
|----------|------------------------------------------|---------|--------|---------------------------------|-------------|----------------------------------|--------|--------|--------------------|
| 9338     | 2,6-dihydroxybenzoic acid                | HMDB    | Endo   | 0.012152748                     | 8           | Benzoic Acid and Derivatives     | 0      | 0      | 303-07-1           |
| 15109    | 2,6-Dimethoxybenzoic acid                | HMDB    | Endo   | 0.171392334                     | 8           | Benzoic Acid and Derivatives     | 0      | 0      | 1466-76-8          |
| 92747    | 20a-Dihydroprogesterone                  | HMDB    | Endo   | 0.020215614                     | 4           | Steroids and Steroid Derivatives | 0      | 0      | 145-14-2           |
| 35027640 | 20-HETE ethanolamide                     | HMDB    | Endo   | 0.020800048                     | 1           | Fatty Amides                     | 0      | 0      | 79551-86-3         |
| 5283157  | 20-Hydroxyeicosatetraenoic acid          | HMDB    | Endo   | 0.051139402                     | 4           | Eicosanoids                      | 3      | 7      | 79551-86-3         |
| 440709   | 21-Deoxycortisol                         | HMDB    | Endo   | 0.001069996                     | 1           | Steroids and Steroid Derivatives | 0      | 1      | 641-77-0           |
| 6434253  | 24,25-Dihydroxyvitamin D                 | HMDB    | Food   | 0.006480873                     | 2           | Prenol Lipids                    | 1      | 0      | 40013-87-4         |
| 121948   | 24-Hydroxycholesterol                    | HMDB    | Food   | 0.001799944                     | 1           | Steroids and Steroid Derivatives | 0      | 10     | 474-73-7           |
| 53477727 | 25,26-dihydroxyvitamin D                 | HMDB    | Food   | 0.001564639                     | 3           | Prenol Lipids                    | 0      | 0      | 29261-12-9         |
| 22833566 | 25-Hydroxyvitamin D2                     | NHANES  | Food   | 1.387772578                     | 1           | Steroids and Steroid Derivatives | 17     | 0      | 21343-40-8         |
| 99470    | 27-Hydroxycholesterol                    | HMDB    | Endo   | 0.299991841                     | 1           | Steroids and Steroid Derivatives | 0      | 12     | 13095-61-9         |
| 227      | 2-Aminobenzoic acid                      | HMDB    | Drug   | 0.000999955                     | 1           | Benzoic Acid and Derivatives     | 0      | 4      | 118-92-3           |
| 6119     | 2-Aminoisobutyric acid                   | HMDB    | Endo   | 0.878886073                     | 2           | Amino Acids and Derivatives      | 0      | 0      | 62-57-7            |
| 5282280  | 2-Arachidonylglycerol                    | HMDB    | Endo   | 7.799814879                     | 1           | Fatty Amides                     | 0      | 14     | 53847-30-6         |
| 99823    | 2-Hydroxy-3-methylbutyric acid           | HMDB    | Endo   | 5.886137441                     | 2           | Fatty Acids and Conjugates       | 0      | 0      | 4026-18-0          |
| 440864   | 2-Hydroxybutyric acid                    | HMDB    | Endo   | 54.00086149                     | 1           | Hydroxy Acids and Derivatives    | 0      | 1      | 3347-90-8          |
| 440623   | 2-Hydroxyestrone                         | HMDB    | Endo   | 0.000201988                     | 2           | Steroids and Steroid Derivatives | 5      | 2      | 362-06-1           |
| 1000     | 2-Hydroxyphenethylamine                  | HMDB    | Endo   | 0.001907809                     | 2           | Phenethylamines                  | 0      | 0      | 7568-93-6          |
| 96       | 2-Ketobutyric acid                       | HMDB    | Endo   | 5.594589668                     | 2           | Keto-Acids and Derivatives       | 1      | 18     | 541-50-4,4387-93-3 |
| 7052     | 2-Methoxybenzoic acid                    | HMDB    | Food   | 0.696143125                     | 8           | Benzoic Acid and Derivatives     | 0      | 0      | 91-52-1            |
| 66414    | 2-Methoxyestradiol                       | HMDB    | Drug   | 0.009999702                     | 1           | Steroids and Steroid Derivatives | 0      | 2      | 362-07-2           |
| 439681   | 2-Methylcitric acid                      | HMDB    | Endo   | 0.07681157                      | 2           | Carboxylic Acids and Derivatives | 0      | 1      | 6061-96-7          |
| 53481667 | 2-Octenoylcarnitine                      | HMDB    | Endo   | 0.200007583                     | 1           | Fatty Acid Esters                | 0      | 0      | .                  |
| 558      | 2-Oxoarginine                            | HMDB    | Endo   | 0.120416345                     | 2           | Fatty Acids and Conjugates       | 0      | 3      | 3715-10-4          |
| 74563    | 2-Oxovaleric acid                        | HMDB    | Endo   | 12.89964769                     | 1           | Keto-Acids and Derivatives       | 0      | 0      | 1821-02-9          |
| 19       | 2-Pyrocatechuic acid                     | HMDB    | Endo   | 0.129005531                     | 1           | Benzoic Acid and Derivatives     | 0      | 0      | 303-38-8           |
| 12025    | 2-Pyrrolidinone                          | HMDB    | Endo   | 0.097500283                     | 1           | Pyrrolidines                     | 0      | 0      | 616-45-5           |
| 64860    | 3-(3,4,5-Trimethoxyphenyl)propanoic acid | HMDB    | Food   | 0.019854988                     | 7           | Phenols and Derivatives          | 0      | 0      | 25173-72-2         |
| 439435   | 3-(3,4-Dihydroxyphenyl)lactic acid       | HMDB    | Endo   | 6.199694397                     | 1           | Benzyl Alcohols and Derivatives  | 0      | 1      | 23028-17-3         |
| 16848    | 3-(3,4-Dimethoxyphenyl)-2-propenoic acid | HMDB    | Food   | 0.535261429                     | 7           | Cinnamic Acid Derivatives        | 0      | 0      | 14737-88-3         |
| 91       | 3-(3-Hydroxyphenyl)propanoic acid        | HMDB    | Food   | 0.07008125                      | 8           | Phenols and Derivatives          | 0      | 1      | 621-54-5           |

| PC_CID   | Chemical                                | Dataset | Source | Concentration (µM) | No. studies | Class                            | PubMed | Biosys | CAS                              |
|----------|-----------------------------------------|---------|--------|--------------------|-------------|----------------------------------|--------|--------|----------------------------------|
| 547      | 3,4-Dihydroxybenzeneacetic acid         | HMDB    | Food   | 0.010628672        | 7           | Phenols and Derivatives          | 0      | 6      | 102-32-9                         |
| 348154   | 3,4-Dihydroxyhydrocinnamic acid         | HMDB    | Food   | 0.031688546        | 9           | Phenols and Derivatives          | 0      | 1      | 1078-61-1                        |
| 85782    | 3,4-Dihydroxymandelic acid              | HMDB    | Endo   | 0.01099956         | 1           | Phenols and Derivatives          | 0      | 3      | 775-01-9                         |
| 91528    | 3,4-Dihydroxyphenylglycol               | HMDB    | Endo   | 0.005999975        | 1           | Phenols and Derivatives          | 1      | 3      | 28822-73-3,3343-19-9,109835-90-7 |
| 74709    | 3,4-O-Dimethylgallic acid               | HMDB    | Food   | 0.03180601         | 8           | Benzoic Acid and Derivatives     | 0      | 0      | 1916-08-1                        |
| 7424     | 3,5-dihydroxybenzoic acid               | HMDB    | Food   | 0.101550405        | 8           | Benzoic Acid and Derivatives     | 0      | 0      | 99-10-5                          |
| 9305     | 3,5-Diiodo-L-tyrosine                   | HMDB    | Endo   | 0.003600077        | 1           | Amino Acids and Derivatives      | 0      | 8      | 300-39-0                         |
| 7155252  | 3,5-Diiodothyronine                     | HMDB    | Endo   | 1.60003E-05        | 1           | Amino Acids and Derivatives      | 0      | 1      | 534-51-0,5563-89-3               |
| 24779614 | 3a-Hydroxy-5b-pregnane-20-one           | HMDB    | Endo   | 0.000288447        | 2           | Steroids and Steroid Derivatives | 0      | 0      | .                                |
| 64956    | 3-Aminoisobutanoic acid                 | HMDB    | Endo   | 0.878886073        | 2           | Amino Acids and Derivatives      | 0      | 3      | 144-90-1                         |
| 53477687 | 3b,17b-Dihydroxyetiocholane             | HMDB    | Endo   | 0.119995624        | 1           | Steroids and Steroid Derivatives | 0      | 0      | 6038-31-9                        |
| 86       | 3-Hydroxyanthranilic acid               | HMDB    | Endo   | 0.079000587        | 1           | Benzoic Acid and Derivatives     | 0      | 5      | 548-93-6                         |
| 7420     | 3-Hydroxybenzoic acid                   | HMDB    | Food   | 0.166926781        | 7           | Benzoic Acid and Derivatives     | 0      | 0      | 99-06-9                          |
| 441      | 3-Hydroxybutyric acid                   | HMDB    | Endo   | 81.41829483        | 8           | Hydroxy Acids and Derivatives    | 6      | 7      | 300-85-6,625-71-8,26063-00-3     |
| 94216    | 3-Hydroxydodecanoic acid                | HMDB    | Endo   | 0.299991841        | 1           | Fatty Acids and Conjugates       | 0      | 0      | 1883-13-2                        |
| 181976   | 3-Hydroxyglutaric acid                  | HMDB    | Endo   | 0.150002998        | 1           | Hydroxy Acids and Derivatives    | 0      | 0      | 638-18-6                         |
| 69362    | 3-Hydroxyisovaleric acid                | HMDB    | Endo   | 4.000022556        | 1           | Hydroxy Acids and Derivatives    | 1      | 0      | 625-08-1                         |
| 12122    | 3-Hydroxyphenylacetic acid              | HMDB    | Food   | 0.232538378        | 9           | Phenylacetic Acid Derivatives    | 0      | 2      | 621-37-4                         |
| 107802   | 3-Hydroxyvaleric acid                   | HMDB    | Endo   | 1                  | 1           | Hydroxy Acids and Derivatives    | 0      | 0      | 10237-77-1                       |
| 3744     | 3-Indolepropionic acid                  | HMDB    | Endo   | 0.480994232        | 1           | Indoles                          | 0      | 0      | 830-96-6                         |
| 3035420  | 3-Methoxy-4-Hydroxyphenylglycol sulfate | HMDB    | Endo   | 0.090004105        | 1           | Phenols and Derivatives          | 0      | 0      | 71324-20-4                       |
| 11461    | 3-Methoxybenzoic acid                   | HMDB    | Food   | 0.242804181        | 8           | Benzoic Acid and Derivatives     | 0      | 0      | 586-38-9                         |
| 1669     | 3-Methoxytyramine                       | HMDB    | Endo   | 0.002499911        | 1           | Phenols and Derivatives          | 1      | 3      | 554-52-9                         |
| 9307     | 3-Methoxytyrosine                       | HMDB    | Endo   | 0.089001683        | 1           | Amino Acids and Derivatives      | 0      | 1      | 300-48-1                         |
| 47       | 3-Methyl-2-oxovaleric acid              | HMDB    | Endo   | 20.21449659        | 2           | Fatty Acids and Conjugates       | 0      | 0      | 1460-34-0                        |
| 69520    | 3-Methylhistamine                       | HMDB    | Endo   | 0.01099956         | 1           | Azoles                           | 0      | 0      | 644-42-8                         |
| 64969    | 3-Methylhistidine                       | HMDB    | Endo   | 2.845958734        | 2           | Amino Acids and Derivatives      | 0      | 1      | 368-16-1                         |
| 10455    | 3-Methylsulfinylpropyl isothiocyanate   | HMDB    | Food   | 0.090004105        | 1           | Sulfoxides                       | 0      | 0      | 505-44-2                         |
| 65124    | 3-Nitrotyrosine                         | HMDB    | Endo   | 0.85001609         | 1           | Amino Acids and Derivatives      | 13     | 2      | 621-44-3,3604-79-3               |
| 439168   | 3-Phosphoglyceric acid                  | HMDB    | Endo   | 47.20028827        | 1           | Sugar Acids and Derivatives      | 0      | 26     | 591-57-1                         |

| PC_CID   | Chemical                              | Dataset | Source | Concentration (µM) | No. studies | Class                            | PubMed | Biosys | CAS                           |
|----------|---------------------------------------|---------|--------|--------------------|-------------|----------------------------------|--------|--------|-------------------------------|
| 4615299  | 3-Pyridylacetic acid                  | HMDB    | Endo   | 2.469955168        | 1           | Pyridines and Derivatives        | 0      | 2      | 501-81-5                      |
| 1549098  | 3-Sulfinoalanine                      | HMDB    | Endo   | 1.380022771        | 1           | Amino Acids and Derivatives      | 0      | 7      | 1115-65-7                     |
| 22833586 | 3-trans,5-cis-Octadienoyl-CoA         | HMDB    | Endo   | 0.037500538        | 1           | Purine Nucleotides               | 0      | 0      | 214769-63-8                   |
| 133246   | 4a-Carbinolamine tetrahydrobiopterin  | HMDB    | Endo   | 4.17995299         | 1           | Pteridines and Derivatives       | 0      | 2      | 79647-29-3                    |
| 18189    | 4-Acetamidobutanoic acid              | HMDB    | Endo   | 0.500023591        | 1           | Fatty Acids and Conjugates       | 0      | 3      | 3025-96-5                     |
| 2148     | 4-Aminohippuric acid                  | HMDB    | Endo   | 18.00050837        | 1           | Amino Acids and Derivatives      | 2      | 5      | 554-52-9                      |
| 403      | 4-Aminophenol                         | HMDB    | Endo   | 10.00014907        | 1           | Phenols and Derivatives          | 0      | 0      | 123-30-8                      |
| 12086    | 4-Ethylbenzoic acid                   | HMDB    | Pollut | 1.594085153        | 8           | Benzoic Acid and Derivatives     | 0      | 0      | 619-64-7                      |
| 31242    | 4-Ethylphenol                         | HMDB    | Food   | 2.165822073        | 8           | Phenols and Derivatives          | 0      | 0      | 123-07-9                      |
| 500      | 4-Guanidinobutanoic acid              | HMDB    | Endo   | 0.084500316        | 2           | Amino Acids and Derivatives      | 0      | 2      | 463-00-3                      |
| 31246    | 4-Heptanone                           | HMDB    | Endo   | 0.029998737        | 1           | Carbonyl Compounds               | 0      | 0      | 123-19-3                      |
| 135      | 4-Hydroxybenzoic acid                 | HMDB    | Food   | 3.269378808        | 8           | Benzoic Acid and Derivatives     | 0      | 8      | 99-96-7                       |
| 3037032  | 4-Hydroxybutyric acid                 | HMDB    | Endo   | 47.99995148        | 1           | Hydroxy Acids and Derivatives    | 0      | 5      | 502-85-2,52352-27-9,1320-61-2 |
| 107669   | 4-Hydroxydebrisoquine                 | HMDB    | Drug   | 0.21699087         | 1           | Quinolines and Derivatives       | 0      | 5      | 59333-79-8                    |
| 102526   | 4-Hydroxyphenyl-2-propionic acid      | HMDB    | Food   | 0.168099368        | 8           | Phenols and Derivatives          | 0      | 0      | 938-96-5                      |
| 979      | 4-Hydroxyphenylpyruvic acid           | HMDB    | Endo   | 0.369982342        | 1           | Benzyl Alcohols and Derivatives  | 0      | 9      | 156-39-8                      |
| 699414   | 4-Methoxycinnamic acid                | HMDB    | Food   | 0.716770194        | 8           | Cinnamic Acid Derivatives        | 0      | 0      | 830-09-1                      |
| 7690     | 4-Methoxyphenylacetic acid            | HMDB    | Endo   | 0.143977247        | 8           | Phenols and Derivatives          | 0      | 0      | 104-01-8                      |
| 78016    | 4-O-Methylgallic acid                 | HMDB    | Food   | 0.036563676        | 8           | Benzoic Acid and Derivatives     | 0      | 0      | 4319-02-2                     |
| 6723     | 4-Pyridoxic acid                      | NHANES  | Endo   | 0.031901572        | 1           | Pyridines and Derivatives        | 1      | 6      | 82-82-6,524-07-2              |
| 134      | 4-Trimethylammonibutanoic acid        | HMDB    | Endo   | 10.00014907        | 1           | Fatty Acids and Conjugates       | 0      | 2      | 407-64-7                      |
| 9548565  | 5,10-Methylene-THF                    | HMDB    | Endo   | 0.009999702        | 1           | Pteridines and Derivatives       | 0      | 15     | 31690-11-6                    |
| 5283158  | 5,15-DIHETE                           | HMDB    | Endo   | 0.003179918        | 3           | Eicosanoids                      | 0      | 0      | 82200-87-1                    |
| 5283142  | 5,6-DHET                              | HMDB    | Endo   | 0.010745158        | 4           | Eicosanoids                      | 0      | 8      | 213382-49-1                   |
| 5283202  | 5,6-Epoxy-8,11,14-eicosatrienoic acid | HMDB    | Endo   | 0.000877529        | 2           | Fatty Acids and Conjugates       | 0      | 14     | 81246-84-6                    |
| 4028     | 5,8,11-Eicosatrienoic acid            | HMDB    | Endo   | 0.249798671        | 3           | Fatty Acids and Conjugates       | 0      | 0      | 20590-32-3                    |
| 242332   | 5a-Androstane-3b,17b-diol             | HMDB    | Endo   | 0.000148995        | 1           | Steroids and Steroid Derivatives | 0      | 0      | 571-20-0                      |
| 92810    | 5a-Pregnane-3,20-dione                | HMDB    | Endo   | 0.030669089        | 2           | Steroids and Steroid Derivatives | 0      | 1      | 566-65-4                      |
| 6439678  | 5-HEPE                                | HMDB    | Endo   | 0.019732268        | 4           | Eicosanoids                      | 0      | 0      | 92008-51-0                    |
| 5280733  | 5-HETE                                | HMDB    | Endo   | 0.142573161        | 8           | Eicosanoids                      | 0      | 7      | 70608-72-9                    |

| PC_CID   | Chemical                      | Dataset | Source | Concentration (µM) | No. studies | Class                            | PubMed | Biosys | CAS                           |
|----------|-------------------------------|---------|--------|--------------------|-------------|----------------------------------|--------|--------|-------------------------------|
| 1826     | 5-Hydroxyindoleacetic acid    | HMDB    | Endo   | 0.051601734        | 1           | Indoles                          | 5      | 9      | 54-16-0,1321-73-9,113303-91-6 |
| 439280   | 5-Hydroxy-L-tryptophan        | HMDB    | Endo   | 0.017999703        | 1           | Amino Acids and Derivatives      | 0      | 11     | 4350-09-8                     |
| 3032849  | 5-Hydroxylysine               | HMDB    | Endo   | 2.50002317         | 1           | Amino Acids and Derivatives      | 0      | 0      | 1190-94-9                     |
| 9061     | 5-Hydroxytryptophol           | HMDB    | Endo   | 0.000900014        | 1           | Indoles                          | 0      | 3      | 154-02-9,120465-13-6          |
| 5283159  | 5-KETE                        | HMDB    | Endo   | 0.013893975        | 3           | Fatty Acids and Conjugates       | 0      | 12     | 126432-17-5                   |
| 1832     | 5-Methoxydimethyltryptamine   | HMDB    | Endo   | 0.210010027        | 1           | Alkaloids and Derivatives        | 0      | 0      | 1019-45-0                     |
| 12835    | 5-Methoxytryptophol           | HMDB    | Endo   | 0.000151564        | 5           | Indoles                          | 0      | 3      | 712-09-4                      |
| 439234   | 5-Methyltetrahydrofolic acid  | HMDB    | Endo   | 0.299991841        | 1           | Pteridines and Derivatives       | 9      | 5      | 134-35-0                      |
| 5312400  | 5-Tetradecenoic acid          | HMDB    | Endo   | 1.500052339        | 1           | Fatty Acids and Conjugates       | 0      | 0      | 544-66-1                      |
| 1864     | 6-Hydroxymelatonin            | HMDB    | Endo   | 0.000239993        | 1           | Indoles                          | 0      | 5      | 2208-41-5                     |
| 5280888  | 6-Keto-prostaglandin F1a      | HMDB    | Endo   | 0.005644351        | 4           | Eicosanoids                      | 16     | 6      | 58962-34-8                    |
| 5283129  | 6-trans-12-epi-Leukotriene B4 | HMDB    | Endo   | 0.000146088        | 2           | Eicosanoids                      | 0      | 4      | 71548-19-1                    |
| 5283128  | 6-trans-Leukotriene B4        | HMDB    | Endo   | 0.00176201         | 3           | Eicosanoids                      | 0      | 4      | 71652-82-9                    |
| 53477732 | 7a-Hydroxycholesterol         | HMDB    | Endo   | 0.179999717        | 1           | Steroids and Steroid Derivatives | 0      | 0      | .                             |
| 473141   | 7b-Hydroxycholesterol         | HMDB    | Endo   | 0.01099956         | 1           | Steroids and Steroid Derivatives | 3      | 0      | 566-27-8                      |
| 439423   | 7-Dehydrocholesterol          | HMDB    | Endo   | 4.999810441        | 1           | Steroids and Steroid Derivatives | 0      | 10     | 434-16-2                      |
| 91474    | 7-Ketocholesterol             | HMDB    | Endo   | 0.033001575        | 1           | Steroids and Steroid Derivatives | 2      | 4      | 566-28-9                      |
| 11361    | 7-Methylguanine               | HMDB    | Endo   | 0.129005531        | 1           | Imidazopyrimidines               | 0      | 0      | 578-76-7                      |
| 5280581  | 8,11,14-Eicosatrienoic acid   | NHANES  | Endo   | 151.0030447        | 1           | Fatty Acids and Conjugates       | 0      | 13     | 1783-84-2                     |
| 5283144  | 8,9-DiHETrE                   | HMDB    | Endo   | 0.01099846         | 4           | Eicosanoids                      | 0      | 8      | 192461-96-4                   |
| 5283203  | 8,9-Epoxyeicosatrienoic acid  | HMDB    | Endo   | 0.627005479        | 1           | Eicosanoids                      | 0      | 14     | 81246-85-7                    |
| 129846   | 8-Dehydrocholesterol          | HMDB    | Endo   | 0.649988896        | 1           | Steroids and Steroid Derivatives | 0      | 0      | 70741-38-7                    |
| 5283154  | 8-HETE                        | HMDB    | Endo   | 0.025601611        | 4           | Eicosanoids                      | 0      | 3      | 98462-03-4                    |
| 119315   | 8-Hydroxyguanine              | HMDB    | Endo   | 0.000100004        | 1           | Imidazopyrimidines               | 1      | 5      | 82014-86-6                    |
| 65131    | 8-Hydroxyguanosine            | HMDB    | Endo   | 0.001419998        | 1           | Purine Nucleosides and Analogues | 1      | 0      | 3868-31-3                     |
| 5282263  | 8-Isoprostaglandin F2a        | HMDB    | Endo   | 0.00030106         | 5           | Eicosanoids                      | 41     | 2      | 27415-26-5                    |
| 107873   | 8-Isoprostane                 | HMDB    | Endo   | 0.000301482        | 3           | Cycloalkanes                     | 41     | 0      | 155976-51-5                   |
| 16061060 | 9(10)-EpODE                   | HMDB    | Endo   | 0.192549888        | 3           | Fatty Acids and Conjugates       | 0      | 0      | .                             |
| 9548877  | 9(S)-HPODE                    | HMDB    | Endo   | 5.140241177        | 1           | Lineolic Acids and Derivatives   | 0      | 2      | 29774-12-7                    |
| 5282965  | 9,10,13-TriHOME               | HMDB    | Endo   | 0.067333325        | 3           | Fatty Acids and Conjugates       | 0      | 1      | 29907-57-1                    |

| PC_CID   | Chemical                              | Dataset | Source | Concentration (µM) | No. studies | Class                            | PubMed | Biosys | CAS                                                                                    |
|----------|---------------------------------------|---------|--------|--------------------|-------------|----------------------------------|--------|--------|----------------------------------------------------------------------------------------|
| 9966640  | 9,10-DHOME                            | HMDB    | Endo   | 4.772641857        | 3           | Fatty Acids and Conjugates       | 0      | 1      | .                                                                                      |
| 16061066 | 9,10-DIHODE                           | HMDB    | Endo   | 0.085949102        | 3           | Lineolic Acids and Derivatives   | 0      | 0      | .                                                                                      |
| 6246154  | 9,10-Epoxyoctadecenoic acid           | HMDB    | Endo   | 0.261113526        | 3           | Fatty Acids and Conjugates       | 0      | 0      | .                                                                                      |
| 9858729  | 9,12,13-TriHOME                       | HMDB    | Endo   | 0.141126306        | 3           | Fatty Acids and Conjugates       | 0      | 1      | .                                                                                      |
| 53481687 | 9,12-Hexadecadienoylcarnitine         | HMDB    | Endo   | 0.009999702        | 1           | Fatty Acid Esters                | 0      | 0      | .                                                                                      |
| 449171   | 9-cis-Retinoic acid                   | HMDB    | Endo   | 0.004849886        | 2           | Prenol Lipids                    | 0      | 12     | 5300-03-8                                                                              |
| 53481651 | 9-Decenoylcarnitine                   | HMDB    | Endo   | 0.169992663        | 1           | Fatty Acid Esters                | 0      | 0      | .                                                                                      |
| 5282796  | 9E,11E-Octadecadienoic acid           | HMDB    | Endo   | 19.29990165        | 1           | Lineolic Acids and Derivatives   | 0      | 0      | 1839-11-8                                                                              |
| 5312978  | 9-HETE                                | HMDB    | Endo   | 0.018935818        | 4           | Eicosanoids                      | 0      | 0      | 79495-85-5                                                                             |
| 53481653 | 9-Hexadecenoylcarnitine               | HMDB    | Endo   | 0.029998737        | 1           | Fatty Acid Esters                | 0      | 0      | .                                                                                      |
| 5312830  | 9-HODE                                | HMDB    | Endo   | 0.303158351        | 4           | Lineolic Acids and Derivatives   | 0      | 9      | 73543-67-6                                                                             |
| 53480359 | 9-HOTE                                | HMDB    | Endo   | 0.167093791        | 3           | Lineolic Acids and Derivatives   | 0      | 0      | .                                                                                      |
| 9839084  | 9-OxoODE                              | HMDB    | Endo   | 0.313392149        | 3           | Lineolic Acids and Derivatives   | 0      | 1      | .                                                                                      |
| 16061061 | A-12(13)-EpODE                        | HMDB    | Endo   | 0.043265488        | 3           | Fatty Acids and Conjugates       | 0      | 0      | .                                                                                      |
| 177      | Acetaldehyde                          | HMDB    | Food   | 1                  | 1           | Carbonyl Compounds               | 3      | 24     | 75-07-0,78944-68-0,12772-68-8                                                          |
| 83944    | Acetaminophen glucuronide             | HMDB    | Drug   | 30.19873391        | 1           | Sugar Acids and Derivatives      | 0      | 4      | 16110-10-4                                                                             |
| 176      | Acetic acid                           | HMDB    | Endo   | 35.69105153        | 2           | Carboxylic Acids and Derivatives | 1      | 52     | 64-19-7,1563-79-7,157090-22-7,207004-55-5,248587-59-9,68475-71-8,77671-22-8,9035-69-2  |
| 6971017  | Acetoacetic acid                      | HMDB    | Endo   | 29.19799376        | 2           | Keto-Acids and Derivatives       | 0      | 13     | 141-81-1                                                                               |
| 447765   | Acetoin                               | HMDB    | Food   | 1.060032958        | 1           | Acyloins                         | 0      | 1      | 78183-56-9                                                                             |
| 12035    | Acetylcysteine                        | HMDB    | Endo   | 4.000022556        | 1           | Amino Acids and Derivatives      | 19     | 0      | 616-91-1,7696-05-1                                                                     |
| 10972    | Acetylglycine                         | HMDB    | Endo   | 87.33925342        | 2           | Amino Acids and Derivatives      | 0      | 0      | 543-24-8                                                                               |
| 171161   | Acetyl-N-formyl-5-methoxykynurenamine | HMDB    | Endo   | 6.50015E-05        | 1           | Benzoic Acid and Derivatives     | 0      | 4      | 52450-38-1                                                                             |
| 750      | Adenine                               | HMDB    | Endo   | 0.438191171        | 2           | Imidazopyrimidines               | 30     | 83     | 56-40-6,25718-94-9,18875-39-3,52955-63-2,57678-19-0,848646-45-7,87867-94-5,112898-03-0 |
| 60961    | Adenosine                             | HMDB    | Endo   | 0.376175308        | 5           | Purine Nucleosides and Analogues | 56     | 45     | 58-61-7,30143-02-3,46946-45-6,46969-16-8                                               |
| 2024     | Adenosine 2',3'-cyclic phosphate      | HMDB    | Endo   | 0.025998927        | 1           | Purine Nucleotides               | 0      | 0      | 634-01-5                                                                               |

| PC_CID  | Chemical                         | Dataset | Source | Concentration ( $\mu\text{M}$ ) | No. studies | Class                                          | PubMed | Biosys | CAS                                                                                                                     |
|---------|----------------------------------|---------|--------|---------------------------------|-------------|------------------------------------------------|--------|--------|-------------------------------------------------------------------------------------------------------------------------|
| 6083    | Adenosine monophosphate          | HMDB    | Endo   | 12.25826006                     | 4           | Purine Nucleotides                             | 7      | 153    | 61-19-8,13270-66-1,162756-82-3,24937-83-5,34051-12-2,47286-65-7,47287-97-8,53624-78-5,55036-25-4,67583-85-1,697214-87-2 |
| 5957    | Adenosine triphosphate           | HMDB    | Endo   | 1894.480618                     | 3           | Purine Nucleotides                             | 19     | 707    | 56-65-5,10168-83-9,16488-07-6,34369-07-8,51569-41-6,71800-44-7,84412-18-0,896506-78-8                                   |
| 196     | Adipic acid                      | HMDB    | Food   | 0.090004105                     | 1           | Carboxylic Acids and Derivatives               | 0      | 1      | 124-04-9                                                                                                                |
| 6022    | ADP                              | HMDB    | Endo   | 160.0041896                     | 1           | Purine Nucleotides                             | 76     | 626    | 58-64-0,84412-16-8,20398-34-9,18389-49-6,896506-82-4,905904-58-7                                                        |
| 5497181 | Adrenic acid                     | NHANES  | Endo   | 25.00060439                     | 1           | Fatty Acids and Conjugates                     | 0      | 10     | 2091-25-0                                                                                                               |
| 5282273 | Adrenoyl ethanolamide            | HMDB    | Endo   | 1.630032576                     | 1           | Fatty Amides                                   | 0      | 0      | 150314-35-5                                                                                                             |
| 186907  | Aflatoxin B1                     | HMDB    | Food   | 0.000900014                     | 1           | Aflatoxins                                     | 17     | 5      | 1162-65-8,11003-08-0,13214-11-4,27261-02-5                                                                              |
| 5839    | Aldosterone                      | HMDB    | Endo   | 9.0941E-05                      | 3           | Steroids and Steroid Derivatives               | 94     | 10     | 52-39-1,10328-70-8,152-04-5                                                                                             |
| 204     | Allantoin                        | HMDB    | Endo   | 2.099921578                     | 1           | Imidazolidines                                 | 0      | 0      | 97-59-6                                                                                                                 |
| 92787   | Alloepipregnanolone              | HMDB    | Endo   | 0.000714163                     | 2           | Steroids and Steroid Derivatives               | 0      | 0      | 516-55-2                                                                                                                |
| 440700  | Allopregnanolone                 | HMDB    | Endo   | 0.001259929                     | 3           | Steroids and Steroid Derivatives               | 0      | 2      | 128-20-1                                                                                                                |
| 456569  | Allopurinol riboside             | HMDB    | Endo   | 4.999810441                     | 1           | Pyrazolopyrimidine Nucleosides and Nucleotides | 0      | 0      | 16220-07-8                                                                                                              |
| 5971    | Allyl isothiocyanate             | HMDB    | Food   | 0.1400018                       | 1           | Isothiocyanates                                | 0      | 6      | 57-06-7                                                                                                                 |
| 4369188 | Alpha-Carotene                   | NHANES  | Food   | 0.05141116                      | 1           | Prenol Lipids                                  | 22     | 2      | 7488-99-5,432-70-2,24319-81-1,52646-96-5                                                                                |
| 9943542 | Alpha-CEHC                       | HMDB    | Food   | 0.013000077                     | 1           | Benzopyrans                                    | 0      | 1      | 4072-32-6                                                                                                               |
| 82400   | Alpha-D-Glucose 1,6-bisphosphate | HMDB    | Endo   | 98.00318714                     | 1           | Monosaccharides                                | 0      | 1      | 10139-18-1                                                                                                              |
| 5282945 | Alpha-dimorphecolic acid         | HMDB    | Endo   | 0.006800222                     | 1           | Lineolic Acids and Derivatives                 | 0      | 0      | 15514-85-9                                                                                                              |
| 11671   | Alpha-Hydroxyisobutyric acid     | HMDB    | Pollut | 7.576110945                     | 2           | Hydroxy Acids and Derivatives                  | 0      | 0      | 594-61-6                                                                                                                |
| 49      | Alpha-ketoisovaleric acid        | HMDB    | Endo   | 11.000052                       | 1           | Fatty Acids and Conjugates                     | 0      | 9      | 759-05-7                                                                                                                |
| 5280934 | Alpha-Linolenic acid             | NHANES  | Food   | 63.09868946                     | 1           | Lineolic Acids and Derivatives                 | 42     | 30     | 463-40-1                                                                                                                |
| 5283449 | Alpha-Linolenoyl ethanolamide    | HMDB    | Endo   | 0.117996537                     | 1           | Fatty Amides                                   | 0      | 0      | 57086-93-8                                                                                                              |

| PC_CID  | Chemical                         | Dataset | Source | Concentration (µM) | No. studies | Class                                       | PubMed | Biosys | CAS                                                                                                |
|---------|----------------------------------|---------|--------|--------------------|-------------|---------------------------------------------|--------|--------|----------------------------------------------------------------------------------------------------|
| 92258   | Alpha-N-Phenylacetyl-L-glutamine | HMDB    | Endo   | 3.340097506        | 1           | Amino Acids and Derivatives                 | 0      | 7      | 28047-15-6                                                                                         |
| 14985   | Alpha-Tocopherol                 | NHANES  | Food   | 25.30747989        | 1           | Prenol Lipids                               | 266    | 5      | 59-02-9,1406-18-4,11105-14-9,16826-11-2,181591-70-8,25094-97-7,4072-33-7                           |
| 5282347 | Alpha-Tocotrienol                | HMDB    | Food   | 4.229991569        | 1           | Prenol Lipids                               | 1      | 0      | 58864-81-6,1721-51-3                                                                               |
| 104727  | Aluminum                         | HMDB    | Food   | 0.184999899        | 1           | Homogeneous Post-transition Metal Compounds | 5      | 0      | 22537-23-1                                                                                         |
| 215     | Aminoacetone                     | HMDB    | Endo   | 59.99732633        | 1           | Carbonyl Compounds                          | 0      | 1      | 298-08-8                                                                                           |
| 469     | Amino adipic acid                | HMDB    | Endo   | 1.999905641        | 1           | Amino Acids and Derivatives                 | 0      | 0      | 542-32-5                                                                                           |
| 564     | Aminocaproic acid                | HMDB    | Drug   | 1.999905641        | 1           | Fatty Acids and Conjugates                  | 0      | 1      | 60-32-2,87867-96-7,93208-38-9                                                                      |
| 222     | Ammonia                          | HMDB    | Endo   | 32.94040435        | 4           | Other Non-metal Organides                   | 9      | 130    | 7664-41-7,3589-23-9,13981-22-1,17778-88-0,208990-07-2,214478-05-4,558443-52-0,63993-67-9,8007-57-6 |
| 2181    | Anabasine                        | HMDB    | Pollut | 0.003099855        | 1           | Alkaloids and Derivatives                   | 0      | 0      | 13078-04-1                                                                                         |
| 5281969 | Anandamide                       | HMDB    | Endo   | 0.42100945         | 3           | Fatty Amides                                | 1      | 7      | 94421-68-8                                                                                         |
| 440114  | Androstenedione                  | HMDB    | Endo   | 0.000360002        | 1           | Steroids and Steroid Derivatives            | 0      | 1      | 1229-12-5                                                                                          |
| 6128    | Androstenedione                  | HMDB    | Endo   | 0.002835321        | 4           | Steroids and Steroid Derivatives            | 62     | 18     | 63-05-8,104534-78-3,117598-81-9                                                                    |
| 5879    | Androsterone                     | HMDB    | Endo   | 0.008831769        | 2           | Steroids and Steroid Derivatives            | 3      | 1      | 53-41-8                                                                                            |
| 443078  | Androsterone glucuronide         | HMDB    | Endo   | 0.056909101        | 4           | Steroids and Steroid Derivatives            | 2      | 1      | 3602-09-3                                                                                          |
| 159663  | Androsterone sulfate             | HMDB    | Endo   | 11.09949931        | 1           | Steroids and Steroid Derivatives            | 0      | 0      | 2479-86-9                                                                                          |
| 112072  | Anserine                         | HMDB    | Food   | 41.00114528        | 1           | Peptidomimetics                             | 0      | 3      | 584-85-0                                                                                           |
| 104894  | Antimony                         | HMDB    | Pollut | 0.003799826        | 1           | Homogeneous Metalloid Compounds             | 2      | 0      | 7440-36-0                                                                                          |
| 3082883 | APGPR Enterostatin               | HMDB    | Endo   | 1.39724159         | 4           | Peptides                                    | 0      | 0      | 117830-79-2                                                                                        |
| 5280960 | Apigenin                         | HMDB    | Food   | 0.126995961        | 1           | Flavonoids                                  | 1      | 1      | 25515-46-2                                                                                         |
| 6449885 | Aquacobalamin                    | HMDB    | Food   | 0.000289835        | 2           | Tetrapyrroles and Derivatives               | 0      | 0      | 13422-52-1                                                                                         |
| 10467   | Arachidic acid                   | NHANES  | Food   | 23.39915709        | 1           | Fatty Acids and Conjugates                  | 0      | 5      | 506-30-9                                                                                           |
| 444899  | Arachidonic acid                 | NHANES  | Endo   | 776.0368452        | 1           | Fatty Acids and Conjugates                  | 48     | 66     | 506-32-1,93444-49-6                                                                                |
| 160437  | Argininic acid                   | HMDB    | Endo   | 0.200007583        | 1           | Amino Acids and Derivatives                 | 0      | 0      | 157-07-3                                                                                           |
| 104734  | Arsenic                          | HMDB    | Pollut | 0.017366712        | 2           | Homogeneous Metalloid Compounds             | 33     | 1      | 22541-54-4                                                                                         |

| PC_CID   | Chemical           | Dataset | Source | Concentration (µM) | No. studies | Class                                      | PubMed | Biosys | CAS                                                            |
|----------|--------------------|---------|--------|--------------------|-------------|--------------------------------------------|--------|--------|----------------------------------------------------------------|
| 2244     | Aspirin            | HMDB    | Drug   | 26.4988146         | 1           | Benzoic Acid and Derivatives               | 515    | 1      | 50-78-2,11126-35-5,11126-37-7,2349-94-2,26914-13-6,98201-60-6  |
| 5368397  | Astaxanthin        | HMDB    | Food   | 0.091996937        | 1           | Prenol Lipids                              | 0      | 1      | 472-61-7                                                       |
| 2249     | Atenolol           | HMDB    | Drug   | 3.750165604        | 1           | Ethers                                     | 113    | 0      | 29122-68-7,60966-51-0,106020-65-9                              |
| 60823    | Atorvastatin       | HMDB    | Drug   | 0.009999702        | 1           | Anilides                                   | 206    | 0      | 134523-00-5                                                    |
| 12795736 | Avenasterol        | HMDB    | Food   | 1.450052844        | 1           | Steroids and Steroid Derivatives           | 0      | 1      | 23290-26-8                                                     |
| 2266     | Azelaic acid       | HMDB    | Endo   | 26.99900464        | 1           | Carboxylic Acids and Derivatives           | 0      | 0      | 123-99-9                                                       |
| 104810   | Barium             | HMDB    | Pollut | 0.008400198        | 1           | Homogeneous Alkaline Earth Metal Compounds | .      | .      | #N/A                                                           |
| 154083   | BDE100             | NHANES  | Pollut | 4.65167E-05        | 1           | Bromodiphenyl Ethers                       | 0      | 0      | 189084-64-8                                                    |
| 155166   | BDE153             | NHANES  | Pollut | 5.90929E-05        | 1           | Bromodiphenyl Ethers                       | 0      | 0      | 68631-49-2                                                     |
| 95170    | BDE47              | NHANES  | Pollut | 0.000242648        | 1           | Bromodiphenyl Ethers                       | 0      | 0      | 5436-43-1                                                      |
| 36159    | BDE99              | NHANES  | Pollut | 8.14354E-05        | 1           | Bromodiphenyl Ethers                       | 0      | 0      | 60348-60-9                                                     |
| 8215     | Behenic acid       | NHANES  | Endo   | 69.29688807        | 1           | Fatty Acids and Conjugates                 | 0      | 1      | 112-85-6                                                       |
| 241      | Benzene            | NHANES  | Pollut | 0.000353545        | 3           | Aromatic Homomonocyclic Compounds          | 7      | 6      | 71-43-2,27271-55-2,8030-30-6,174973-66-1,26181-88-4,54682-86-9 |
| 243      | Benzoic acid       | HMDB    | Food   | 15.76196879        | 8           | Benzoic Acid and Derivatives               | 0      | 9      | 65-85-0                                                        |
| 2353     | Berberine          | HMDB    | Drug   | 0.001299988        | 1           | Alkaloids and Derivatives                  | 0      | 0      | 2086-83-1                                                      |
| 107649   | Beryllium          | HMDB    | Pollut | 0.026601172        | 1           | Homogeneous Alkaline Earth Metal Compounds | 13     | 0      | 7440-41-7                                                      |
| 239      | Beta-Alanine       | HMDB    | Endo   | 2.541107476        | 5           | Amino Acids and Derivatives                | 5      | 23     | 107-95-9,87867-95-6                                            |
| 5280489  | Beta-Carotene      | NHANES  | Food   | 0.225372656        | 1           | Prenol Lipids                              | 194    | 10     | 7235-40-7,116-32-5,31797-85-0                                  |
| 5281235  | Beta-Cryptoxanthin | NHANES  | Food   | 0.13927568         | 1           | Prenol Lipids                              | 19     | 1      | 472-70-8                                                       |
| 247      | Betaine            | HMDB    | Endo   | 58.32320257        | 3           | Amino Acids and Derivatives                | 6      | 22     | 107-43-7,11042-12-9,24980-93-6,45631-77-4,590-30-7             |
| 439734   | Beta-Leucine       | HMDB    | Endo   | 4.799923595        | 1           | Amino Acids and Derivatives                | 0      | 0      | 5699-54-7                                                      |
| 222284   | Beta-Sitosterol    | HMDB    | Food   | 22.8008998         | 1           | Steroids and Steroid Derivatives           | 13     | 1      | 83-46-5,68555-08-8,5779-62-4                                   |
| 8989     | Beta-tocopherol    | HMDB    | Food   | 0.200007583        | 1           | Prenol Lipids                              | 0      | 2      | 148-03-8                                                       |



| PC_CID   | Chemical             | Dataset | Source | Concentration (µM) | No. studies | Class                                      | PubMed | Biosys | CAS                                                                                                                  |
|----------|----------------------|---------|--------|--------------------|-------------|--------------------------------------------|--------|--------|----------------------------------------------------------------------------------------------------------------------|
| 5280352  | Bilirubin            | HMDB    | Endo   | 11.64876307        | 3           | Tetrapyrroles and Derivatives              | 167    | 6      | 11053-42-2,114-24-9,18422-02-1,188341-33-5,19245-52-4,39372-61-7,493-86-7,55527-40-7,856927-39-4,917-01-1,93891-87-3 |
| 12646210 | Biopterin            | HMDB    | Endo   | 0.017000713        | 1           | Pteridines and Derivatives                 | 0      | 0      | 13039-82-2                                                                                                           |
| 171548   | Biotin               | HMDB    | Food   | 0.001745874        | 2           | Thienoimidazolidines                       | 1      | 14     | 58-85-5,15720-24-8,56846-45-8,22879-79-4,3672-05-7                                                                   |
| 86492    | Bisnorbiotin         | HMDB    | Endo   | 0.001504041        | 3           | Fatty Acids and Conjugates                 | 0      | 1      | 16968-98-2                                                                                                           |
| 5280644  | Bovinic acid         | HMDB    | Food   | 2.029927341        | 1           | Lineolic Acids and Derivatives             | 0      | 1      | 2540-56-9                                                                                                            |
| 5283660  | Brassicasterol       | HMDB    | Food   | 0.570010783        | 1           | Steroids and Steroid Derivatives           | 0      | 0      | 474-67-9                                                                                                             |
| 6359     | Bromodichloromethane | NHANES  | Pollut | 1.02074E-05        | 3           | Organochlorides                            | 1      | 0      | 75-27-4                                                                                                              |
| 6834     | Brompheniramine      | HMDB    | Drug   | 0.024000035        | 1           | Pheniramines                               | 0      | 0      | 86-22-6                                                                                                              |
| 264      | Butyric acid         | HMDB    | Food   | 1                  | 1           | Fatty Acids and Conjugates                 | 0      | 16     | 107-92-6                                                                                                             |
| 439829   | Butyrylcarnitine     | HMDB    | Endo   | 0.263474155        | 2           | Fatty Acid Esters                          | 0      | 0      | 25576-40-3                                                                                                           |
| 31193    | Cadmium              | NHANES  | Pollut | 0.002861813        | 6           | Homogeneous Transition Metal Compounds     | 30     | 0      | 22537-48-0                                                                                                           |
| 689043   | Caffeic acid         | HMDB    | Food   | 0.687564249        | 9           | Cinnamic Acid Derivatives                  | 1      | 1      | 331-39-5,501-16-6,71693-97-5,3598-26-3                                                                               |
| 2519     | Caffeine             | HMDB    | Food   | 77.99931152        | 1           | Imidazopyrimidines                         | 56     | 14     | 58-08-2,71701-02-5,95789-13-2                                                                                        |
| 5283731  | Calcidiol            | HMDB    | Food   | 0.060319491        | 3           | Prenol Lipids                              | 52     | 12     | 19356-17-3,63283-36-3,25631-40-7,1384584-62-6                                                                        |
| 5280453  | Calcitriol           | HMDB    | Food   | 7.9775E-05         | 2           | Prenol Lipids                              | 34     | 14     | 32222-06-3                                                                                                           |
| 271      | Calcium              | HMDB    | Food   | 2382.724834        | 3           | Homogeneous Alkaline Earth Metal Compounds | 379    | 271    | 14127-61-8,17787-72-3                                                                                                |
| 23724579 | Campestanol          | HMDB    | Food   | 2.50002317         | 1           | Steroids and Steroid Derivatives           | 1      | 1      | 474-60-2                                                                                                             |
| 173183   | Campesterol          | HMDB    | Food   | 17.23082619        | 1           | Steroids and Steroid Derivatives           | 10     | 2      | 474-62-4                                                                                                             |
| 5281227  | Canthaxanthin        | HMDB    | Food   | 0.069997203        | 1           | Prenol Lipids                              | 2      | 1      | 514-78-3                                                                                                             |
| 2969     | Capric acid          | HMDB    | Endo   | 11.000052          | 1           | Fatty Acids and Conjugates                 | 0      | 8      | 334-48-5                                                                                                             |
| 8892     | Caproic acid         | HMDB    | Endo   | 16.99977315        | 1           | Fatty Acids and Conjugates                 | 0      | 0      | 142-62-1                                                                                                             |
| 119389   | Caprylic acid        | HMDB    | Endo   | 4.472287399        | 2           | Fatty Acids and Conjugates                 | 0      | 1      | 124-07-2,68937-74-6                                                                                                  |

| PC_CID   | Chemical                    | Dataset | Source | Concentration (µM) | No. studies | Class                            | PubMed | Biosys | CAS                                                                                                         |
|----------|-----------------------------|---------|--------|--------------------|-------------|----------------------------------|--------|--------|-------------------------------------------------------------------------------------------------------------|
| 712      | Carbon monoxide             | HMDB    | Endo   | 158.7451363        | 2           | Aliphatic Acyclic Compounds      | 6      | 25     | 50-00-0,30525-89-4,104512-58-5,104512-63-2,104814-22-4,112068-71-0,53026-80-5,8005-38-7,8006-07-3,8013-13-6 |
| 439224   | Carnosine                   | HMDB    | Endo   | 6.539756942        | 1           | Peptidomimetics                  | 1      | 4      | 305-84-0                                                                                                    |
| 9064     | Catechin                    | HMDB    | Food   | 0.891633594        | 2           | Flavonoids                       | 9      | 0      | 154-23-4,159761-73-6,16198-00-8,321-01-7,4211-28-3,5323-80-8,7295-85-4,100786-01-4                          |
| 6132     | CDP                         | HMDB    | Endo   | 35.99931822        | 1           | Pyrimidine Nucleotides           | 0      | 15     | 63-38-7                                                                                                     |
| 99486    | CE(14:0)                    | HMDB    | Endo   | 79.99786925        | 1           | Steroids and Steroid Derivatives | 0      | 0      | 1989-52-2                                                                                                   |
| 53480456 | CE(14:1(9Z))                | HMDB    | Endo   | 11.21105113        | 2           | Steroids and Steroid Derivatives | 0      | 0      | .                                                                                                           |
| 246520   | CE(16:0)                    | HMDB    | Endo   | 237.9355884        | 4           | Steroids and Steroid Derivatives | 0      | 0      | 601-34-3                                                                                                    |
| 22833543 | CE(16:1(9Z))                | HMDB    | Endo   | 114.8009777        | 2           | Steroids and Steroid Derivatives | 0      | 0      | 16711-66-3                                                                                                  |
| 118246   | CE(18:0)                    | HMDB    | Endo   | 47.03537603        | 2           | Steroids and Steroid Derivatives | 0      | 1      | 35602-69-8                                                                                                  |
| 53477793 | CE(18:1(11Z))               | HMDB    | Endo   | 153.5459698        | 2           | Steroids and Steroid Derivatives | 0      | 0      | .                                                                                                           |
| 5283632  | CE(18:1(9Z))                | HMDB    | Endo   | 612.7763351        | 2           | Steroids and Steroid Derivatives | 1      | 0      | 303-43-5                                                                                                    |
| 5287939  | CE(18:2(9Z,12Z))            | HMDB    | Endo   | 1655.734507        | 2           | Steroids and Steroid Derivatives | 2      | 0      | 604-33-1,100339-48-8,126346-09-6,55102-87-9                                                                 |
| 53480458 | CE(18:3(6Z,9Z,12Z))         | HMDB    | Endo   | 58.97419645        | 2           | Steroids and Steroid Derivatives | 0      | 0      | .                                                                                                           |
| 6436907  | CE(18:3(9Z,12Z,15Z))        | HMDB    | Endo   | 58.89757981        | 2           | Steroids and Steroid Derivatives | 0      | 0      | 2545-22-4                                                                                                   |
| 16061336 | CE(20:0)                    | HMDB    | Endo   | 6.144761929        | 2           | Steroids and Steroid Derivatives | 0      | 1      | 2573-03-7                                                                                                   |
| 53477794 | CE(20:1(11Z))               | HMDB    | Endo   | 1.260993623        | 2           | Steroids and Steroid Derivatives | 0      | 0      | 70832-37-0                                                                                                  |
| 53477891 | CE(20:2(6Z,9Z))             | HMDB    | Endo   | 12.06368862        | 2           | Steroids and Steroid Derivatives | 0      | 0      | 77715-45-8                                                                                                  |
| 53480461 | CE(20:3(5Z,8Z,11Z))         | HMDB    | Endo   | 9.46593912         | 2           | Steroids and Steroid Derivatives | 0      | 0      | .                                                                                                           |
| 53477892 | CE(20:3(8Z,11Z,14Z))        | HMDB    | Endo   | 24.46882847        | 2           | Steroids and Steroid Derivatives | 0      | 0      | 7274-08-0                                                                                                   |
| 6479222  | CE(20:4(5Z,8Z,11Z,14Z))     | HMDB    | Endo   | 215.2499692        | 2           | Steroids and Steroid Derivatives | 0      | 1      | 604-34-2                                                                                                    |
| 53480459 | CE(20:4(8Z,11Z,14Z,17Z))    | HMDB    | Endo   | 24.19388705        | 2           | Steroids and Steroid Derivatives | 0      | 0      | .                                                                                                           |
| 53477889 | CE(20:5(5Z,8Z,11Z,14Z,17Z)) | HMDB    | Endo   | 39.07176174        | 1           | Steroids and Steroid Derivatives | 0      | 0      | 74892-97-0                                                                                                  |
| 16061339 | CE(22:0)                    | HMDB    | Endo   | 4.98383662         | 2           | Steroids and Steroid Derivatives | 0      | 1      | 61510-09-6                                                                                                  |
| 53480460 | CE(22:1(13Z))               | HMDB    | Endo   | 4.312854578        | 2           | Steroids and Steroid Derivatives | 0      | 0      | .                                                                                                           |
| 53477893 | CE(22:2(13Z,16Z))           | HMDB    | Endo   | 0.387747858        | 3           | Steroids and Steroid Derivatives | 0      | 0      | .                                                                                                           |
| 53480462 | CE(22:5(4Z,7Z,10Z,13Z,16Z)) | HMDB    | Endo   | 3.279857578        | 1           | Steroids and Steroid Derivatives | 0      | 0      | .                                                                                                           |

| PC_CID   | Chemical                                | Dataset | Source | Concentration (µM) | No. studies | Class                                  | PubMed | Biosys | CAS                                                                                                                                                  |
|----------|-----------------------------------------|---------|--------|--------------------|-------------|----------------------------------------|--------|--------|------------------------------------------------------------------------------------------------------------------------------------------------------|
| 53480463 | CE(22:5(7Z,10Z,13Z,16Z,19Z))            | HMDB    | Endo   | 3.230057697        | 1           | Steroids and Steroid Derivatives       | 0      | 0      | .                                                                                                                                                    |
| 53477890 | CE(22:6(4Z,7Z,10Z,13Z,16Z,19Z))         | HMDB    | Endo   | 26.49086615        | 2           | Steroids and Steroid Derivatives       | 0      | 0      | 70110-50-8                                                                                                                                           |
| 53480464 | CE(24:0)                                | HMDB    | Endo   | 0.91998308         | 1           | Steroids and Steroid Derivatives       | 0      | 0      | .                                                                                                                                                    |
| 2662     | Celecoxib                               | HMDB    | Drug   | 0.025699082        | 1           | Phenylpyrazoles                        | 20     | 4      | 169590-42-5,184007-95-2,194044-54-7                                                                                                                  |
| 5283563  | Ceramide (d18:1/9Z-18:1)                | HMDB    | Endo   | 8.999778807        | 1           | Sphingolipids                          | 0      | 0      | 104404-17-3                                                                                                                                          |
| 53481046 | Ceramide(d18:0/12:0)                    | HMDB    | Endo   | 0.081049111        | 14          | Sphingolipids                          | 0      | 0      | .                                                                                                                                                    |
| 53481052 | Ceramide(d18:1/22:1(13Z))               | HMDB    | Endo   | 0.128016003        | 14          | Sphingolipids                          | 0      | 0      | .                                                                                                                                                    |
| 53245830 | Cervonoyl ethanolamide                  | HMDB    | Endo   | 0.400997535        | 1           | Fatty Acid Esters                      | 0      | 0      | .                                                                                                                                                    |
| 10133    | Chenodeoxycholic acid                   | HMDB    | Endo   | 1.150273799        | 2           | Steroids and Steroid Derivatives       | 2      | 19     | 474-25-9                                                                                                                                             |
| 21252312 | Chenodeoxycholic acid 3-sulfate         | HMDB    | Endo   | 0.099998509        | 1           | Steroids and Steroid Derivatives       | 0      | 0      | 59132-32-0                                                                                                                                           |
| 12544    | Chenodeoxycholic acid glycine conjugate | HMDB    | Endo   | 0.060000643        | 1           | Steroids and Steroid Derivatives       | 0      | 11     | 640-79-9                                                                                                                                             |
| 1794427  | Chlorogenic acid                        | HMDB    | Food   | 0.039999033        | 1           | Cyclic Alcohols and Derivatives        | 2      | 0      | 327-97-9                                                                                                                                             |
| 5997     | Cholesterol                             | HMDB    | Endo   | 416.5056388        | 4           | Steroids and Steroid Derivatives       | 4499   | 73     | 57-88-5,80356-14-5,209124-38-9,218965-24-3,22243-67-0,262418-13-3,378185-03-6,676322-57-9,732297-95-9,793670-51-6,80356-33-8,849593-11-9,856708-55-9 |
| 65076    | Cholesterol sulfate                     | HMDB    | Endo   | 5.400005651        | 1           | Steroids and Steroid Derivatives       | 0      | 5      | 1256-86-6                                                                                                                                            |
| 221493   | Cholic acid                             | HMDB    | Endo   | 0.720002928        | 1           | Steroids and Steroid Derivatives       | 0      | 24     | 81-25-4,73163-53-8                                                                                                                                   |
| 305      | Choline                                 | HMDB    | Food   | 8.898653739        | 4           | Alcohols and Polyols                   | 13     | 38     | 62-49-7,123-41-1,139741-81-4                                                                                                                         |
| 24766    | Chondroitin sulfate                     | HMDB    | Endo   | 9.580214671        | 1           | Disaccharides                          | 9      | 2      | 9007-28-7,11120-14-2,25322-46-7,56480-79-6,9046-20-2,9062-29-7,9088-44-2                                                                             |
| 27668    | Chromium                                | HMDB    | Pollut | 0.004806433        | 2           | Homogeneous Transition Metal Compounds | 9      | 1      | 16065-83-1                                                                                                                                           |
| 444539   | Cinnamic acid                           | HMDB    | Food   | 0.190215051        | 8           | Cinnamic Acid Derivatives              | 0      | 2      | 140-10-3                                                                                                                                             |
| 22833575 | cis-5-Tetradecenoylcarnitine            | HMDB    | Endo   | 0.060000643        | 1           | Fatty Acid Esters                      | 0      | 0      | 835598-21-5                                                                                                                                          |
| 6857557  | cis-7,7',8,8',11,12-Hexahydro-Carotene  | HMDB    | Endo   | 0.302008535        | 1           | Prenol Lipids                          | 0      | 0      | 118574-77-9                                                                                                                                          |
| 11722594 | Cis-8,11,14,17-Eicosatetraenoic acid    | HMDB    | Endo   | 0.007000316        | 1           | Fatty Acids and Conjugates             | 0      | 0      | 2091-26-1                                                                                                                                            |
| 5282761  | cis-Vaccenic acid (18:1n-7)             | NHANES  | Food   | 145.9990332        | 1           | Fatty Acids and Conjugates             | 2      | 0      | 506-17-2                                                                                                                                             |

| PC_CID   | Chemical             | Dataset | Source | Concentration (µM) | No. studies | Class                                  | PubMed | Biosys | CAS                                                                                                                                   |
|----------|----------------------|---------|--------|--------------------|-------------|----------------------------------------|--------|--------|---------------------------------------------------------------------------------------------------------------------------------------|
| 311      | Citric acid          | HMDB    | Endo   | 124.0643025        | 3           | Carboxylic Acids and Derivatives       | 7      | 26     | 77-92-9,12262-73-6,5077-53-2,6018-92-4,245654-34-6,43136-35-2,623158-96-3,856568-15-5,878903-72-1,890704-54-8,896506-46-0,906507-37-7 |
| 9750     | Citrulline           | HMDB    | Endo   | 36.64584309        | 3           | Amino Acids and Derivatives            | 10     | 19     | 372-75-8                                                                                                                              |
| 46173708 | Cob(II)alamin        | HMDB    | Endo   | 0.000300008        | 1           | Tetrapyrroles and Derivatives          | 0      | 1      | 18534-66-2                                                                                                                            |
| 5460183  | Cobalamin            | HMDB    | Food   | 0.000244939        | 2           | Prenol Lipids                          | 0      | 9      | 18534-66-2                                                                                                                            |
| 104730   | Cobalt               | HMDB    | Pollut | 0.001830072        | 1           | Homogeneous Transition Metal Compounds | 4      | 10     | 7440-48-4,13981-50-5,16610-75-6,177256-35-8,184637-91-0,195161-79-6                                                                   |
| 9962735  | Coenzyme Q10         | HMDB    | Endo   | 0.27049545         | 5           | Prenol Lipids                          | 0      | 4      | 992-78-9                                                                                                                              |
| 23978    | Copper               | HMDB    | Food   | 18.87616472        | 6           | Homogeneous Transition Metal Compounds | 53     | 17     | 7440-50-8,13982-06-4,15128-03-7,133353-46-5,133353-47-6,195161-80-9,65555-90-0,72514-83-1                                             |
| 68271    | Coproporphyrin I     | HMDB    | Endo   | 0.007745835        | 2           | Tetrapyrroles and Derivatives          | 0      | 1      | 531-14-6                                                                                                                              |
| 321      | Coproporphyrin III   | HMDB    | Endo   | 0.005999975        | 1           | Tetrapyrroles and Derivatives          | 0      | 6      | 2624-63-7                                                                                                                             |
| 440776   | Coproporphyrinogen I | HMDB    | Endo   | 0.015000076        | 1           | Tetrapyrroles and Derivatives          | 0      | 4      | 31110-56-2                                                                                                                            |
| 440707   | Cortexolone          | HMDB    | Endo   | 0.003899917        | 1           | Steroids and Steroid Derivatives       | 1      | 12     | 152-58-9                                                                                                                              |
| 5753     | Corticosterone       | HMDB    | Drug   | 0.027000497        | 1           | Steroids and Steroid Derivatives       | 1      | 13     | 50-22-6                                                                                                                               |
| 5754     | Cortisol             | HMDB    | Endo   | 0.274171899        | 3           | Steroids and Steroid Derivatives       | 176    | 18     | 50-23-7,8056-08-4,80562-38-5,8063-42-1                                                                                                |
| 222786   | Cortisone            | HMDB    | Endo   | 0.046019043        | 3           | Steroids and Steroid Derivatives       | 3      | 11     | 53-06-5                                                                                                                               |
| 854019   | Cotinine             | NHANES  | Pollut | 0.000321858        | 6           | Alkaloids and Derivatives              | 78     | 2      | 486-56-6                                                                                                                              |
| 9815514  | Cotinine N-oxide     | HMDB    | Pollut | 1.7E-05            | 1           | Alkaloids and Derivatives              | 0      | 0      | 36508-80-2                                                                                                                            |
| 323      | Coumaric acid        | HMDB    | Food   | 0.583798144        | 8           | Cinnamic Acid Derivatives              | 3      | 11     | 91-64-5                                                                                                                               |
| 5281707  | Coumesterol          | HMDB    | Food   | 0.012299459        | 1           | Benzopyrans                            | 0      | 0      | 479-13-0                                                                                                                              |
| 586      | Creatine             | HMDB    | Endo   | 39.2636832         | 3           | Amino Acids and Derivatives            | 50     | 8      | 57-00-1                                                                                                                               |
| 588      | Creatinine           | HMDB    | Endo   | 74.47027109        | 5           | Lactams                                | 1654   | 12     | 60-27-5,82016-55-5,15231-31-9,45514-66-7                                                                                              |
| 969516   | Curcumin             | HMDB    | Food   | 0.169992663        | 1           | Curcuminoids                           | 3      | 1      | 458-37-7,8024-37-1,15845-47-3,33171-04-9,73729-23-4,79257-48-0,91884-86-5                                                             |
| 540      | Cyanate              | HMDB    | Endo   | 0.044999676        | 1           | Nitriles                               | 0      | 2      | 420-05-3                                                                                                                              |

| PC_CID   | Chemical                 | Dataset | Source | Concentration ( $\mu\text{M}$ ) | No. studies | Class                                | PubMed | Biosys | CAS                                                                                                                                |
|----------|--------------------------|---------|--------|---------------------------------|-------------|--------------------------------------|--------|--------|------------------------------------------------------------------------------------------------------------------------------------|
| 768      | Cyanide                  | HMDB    | Endo   | 4.440646616                     | 2           | Nitriles                             | 0      | 6      | 74-90-8,191234-22-7,341972-31-4                                                                                                    |
| 68247    | Cyanidin                 | HMDB    | Food   | 0.02000046                      | 1           | Flavonoids                           | 0      | 0      | 528-58-5                                                                                                                           |
| 4289526  | Cyanocobalamin           | NHANES  | Food   | 0.000368894                     | 1           | Tetrapyrroles and Derivatives        | 347    | 0      | 68-19-9                                                                                                                            |
| 6076     | Cyclic AMP               | HMDB    | Endo   | 0.008499907                     | 1           | Purine Nucleotides                   | 9      | 126    | 60-92-4,11002-78-1,54532-48-8                                                                                                      |
| 24316    | Cyclic GMP               | HMDB    | Endo   | 0.00550004                      | 1           | Purine Nucleotides                   | 18     | 24     | 7665-99-8                                                                                                                          |
| 439498   | Cysteinylglycine         | HMDB    | Endo   | 36.22320733                     | 3           | Peptides                             | 14     | 10     | 19246-18-5                                                                                                                         |
| 6175     | Cytidine                 | HMDB    | Endo   | 0.158120165                     | 2           | Pyrimidine Nucleosides and Analogues | 1      | 15     | 65-46-3,4395-95-3,494210-74-1,873077-03-3                                                                                          |
| 764      | Cytosine                 | HMDB    | Endo   | 6.400012862                     | 1           | Diazines                             | 46     | 17     | 73-40-5,11006-44-3,66224-64-4,158475-99-1,15986-36-4,37432-34-1,492-33-1,54435-87-9,69257-39-2,929247-29-0,934585-79-2,936902-27-1 |
| 439391   | D-2-Hydroxyglutaric acid | HMDB    | Endo   | 0.699982461                     | 1           | Hydroxy Acids and Derivatives        | 0      | 6      | 2889-31-8                                                                                                                          |
| 5281708  | Daidzein                 | HMDB    | Food   | 0.003293844                     | 2           | Flavonoids                           | 6      | 0      | 486-66-8                                                                                                                           |
| 83887    | D-Aspartic acid          | HMDB    | Endo   | 20.49334092                     | 2           | Amino Acids and Derivatives          | 0      | 5      | 1783-96-6                                                                                                                          |
| 65091    | dCTP                     | HMDB    | Endo   | 29.00012093                     | 1           | Pyrimidine Nucleotides               | 0      | 24     | 2056-98-6,102783-51-7                                                                                                              |
| 3035     | DDE                      | NHANES  | Pollut | 0.005131281                     | 3           | Organo-chlorine Pesticides           | 36     | 1      | 72-55-9,12002-54-9                                                                                                                 |
| 2966     | Debrisoquine             | HMDB    | Drug   | 0.149001337                     | 1           | Isoquinolines                        | 6      | 7      | 1131-64-2,581-88-4                                                                                                                 |
| 10245190 | Decanoylcarnitine        | HMDB    | Endo   | 0.191474622                     | 2           | Fatty Acid Esters                    | 0      | 0      | 1492-27-9                                                                                                                          |
| 835      | Dehydroascorbic acid     | HMDB    | Endo   | 2.339880828                     | 2           | Monosaccharides                      | 1      | 7      | 490-83-5,19455-06-2                                                                                                                |
| 5881     | Dehydroepiandrosterone   | HMDB    | Endo   | 0.015876742                     | 3           | Steroids and Steroid Derivatives     | 51     | 18     | 53-43-0,105597-37-3,108673-53-6,9013-35-8                                                                                          |
| 92094    | Delta-Tocopherol         | HMDB    | Food   | 11.85441059                     | 3           | Prenol Lipids                        | 0      | 2      | 119-13-1                                                                                                                           |
| 222528   | Deoxycholic acid         | HMDB    | Endo   | 0.433700966                     | 2           | Steroids and Steroid Derivatives     | 3      | 7      | 83-44-3,115349-14-9                                                                                                                |
| 6166     | Deoxycorticosterone      | HMDB    | Endo   | 0.072999696                     | 1           | Steroids and Steroid Derivatives     | 1      | 13     | 64-85-7                                                                                                                            |
| 13711    | Deoxycytidine            | HMDB    | Endo   | 0.200007583                     | 1           | Pyrimidine Nucleosides and Analogues | 43     | 9      | 951-77-9,207121-53-7,56905-41-0                                                                                                    |
| 53477703 | Deoxypridinoline         | HMDB    | Endo   | 0.000700021                     | 1           | Amino Acids and Derivatives          | 3      | 0      | 83462-55-9                                                                                                                         |
| 13712    | Deoxyuridine             | HMDB    | Endo   | 0.184095617                     | 3           | Pyrimidine Nucleosides and Analogues | 0      | 9      | 951-78-0                                                                                                                           |
| 10394    | Desaminotyrosine         | HMDB    | Endo   | 0.810017036                     | 8           | Phenols and Derivatives              | 0      | 0      | 501-97-3                                                                                                                           |

| PC_CID   | Chemical                             | Dataset | Source | Concentration (µM) | No. studies | Class                            | PubMed | Biosys | CAS        |
|----------|--------------------------------------|---------|--------|--------------------|-------------|----------------------------------|--------|--------|------------|
| 439577   | Desmosterol                          | HMDB    | Endo   | 2.6216398          | 2           | Steroids and Steroid Derivatives | 3      | 7      | 313-04-2   |
| 439163   | D-Fructose                           | HMDB    | Endo   | 38.57483034        | 2           | Monosaccharides                  | 11     | 6      | 10247-46-8 |
| 13734178 | DG(14:0/16:0/0:0)                    | HMDB    | Endo   | 0.580015762        | 1           | Glycerolipids                    | 0      | 0      | .          |
| 53477950 | DG(14:0/16:1(9Z)/0:0)                | HMDB    | Endo   | 0.231008678        | 1           | Glycerolipids                    | 0      | 0      | .          |
| 53477951 | DG(14:0/18:0/0:0)                    | HMDB    | Endo   | 1.420061244        | 1           | Glycerolipids                    | 0      | 0      | .          |
| 53477952 | DG(14:0/18:1(11Z)/0:0)               | HMDB    | Endo   | 1.070044247        | 1           | Glycerolipids                    | 0      | 0      | .          |
| 14275352 | DG(14:0/18:2(9Z,12Z)/0:0)            | HMDB    | Endo   | 0.414990355        | 1           | Glycerolipids                    | 0      | 0      | .          |
| 53477953 | DG(14:0/18:3(6Z,9Z,12Z)/0:0)         | HMDB    | Endo   | 0.060000643        | 1           | Glycerolipids                    | 0      | 0      | .          |
| 53477955 | DG(14:0/20:0/0:0)                    | HMDB    | Endo   | 1.369985286        | 1           | Glycerolipids                    | 0      | 0      | .          |
| 53477956 | DG(14:0/20:1(11Z)/0:0)               | HMDB    | Endo   | 3.870176062        | 1           | Glycerolipids                    | 0      | 0      | .          |
| 53477957 | DG(14:0/20:2(11Z,14Z)/0:0)           | HMDB    | Endo   | 2.819895986        | 1           | Eicosanoids                      | 0      | 0      | .          |
| 53477958 | DG(14:0/20:3(5Z,8Z,11Z)/0:0)         | HMDB    | Endo   | 1.650040775        | 1           | Eicosanoids                      | 0      | 0      | .          |
| 53477960 | DG(14:0/20:4(5Z,8Z,11Z,14Z)/0:0)     | HMDB    | Endo   | 0.172993718        | 1           | Eicosanoids                      | 0      | 0      | .          |
| 53477963 | DG(14:0/22:0/0:0)                    | HMDB    | Endo   | 0.689974941        | 1           | Glycerolipids                    | 0      | 0      | .          |
| 53477964 | DG(14:0/22:1(13Z)/0:0)               | HMDB    | Endo   | 1.239985889        | 1           | Glycerolipids                    | 0      | 0      | .          |
| 53477965 | DG(14:0/22:2(13Z,16Z)/0:0)           | HMDB    | Endo   | 4.060069128        | 1           | Glycerolipids                    | 0      | 0      | .          |
| 53477966 | DG(14:0/22:4(7Z,10Z,13Z,16Z)/0:0)    | HMDB    | Endo   | 5.279862206        | 1           | Glycerolipids                    | 0      | 0      | .          |
| 53477967 | DG(14:0/22:5(4Z,7Z,10Z,13Z,16Z)/0:0) | HMDB    | Endo   | 0.960981616        | 1           | Glycerolipids                    | 0      | 0      | .          |
| 53477970 | DG(14:0/24:0/0:0)                    | HMDB    | Endo   | 0.003000129        | 1           | Glycerolipids                    | 0      | 0      | .          |
| 53477971 | DG(14:0/24:1(15Z)/0:0)               | HMDB    | Endo   | 0.013000077        | 1           | Glycerolipids                    | 0      | 0      | .          |
| 53477975 | DG(14:1(9Z)/16:0/0:0)                | HMDB    | Endo   | 0.231008678        | 1           | Glycerolipids                    | 0      | 0      | .          |
| 53477976 | DG(14:1(9Z)/16:1(9Z)/0:0)            | HMDB    | Endo   | 0.03200062         | 1           | Glycerolipids                    | 0      | 0      | .          |
| 53477977 | DG(14:1(9Z)/18:0/0:0)                | HMDB    | Endo   | 1.070044247        | 1           | Glycerolipids                    | 0      | 0      | .          |
| 53477978 | DG(14:1(9Z)/18:1(11Z)/0:0)           | HMDB    | Endo   | 0.414990355        | 1           | Glycerolipids                    | 0      | 0      | .          |
| 53477980 | DG(14:1(9Z)/18:2(9Z,12Z)/0:0)        | HMDB    | Endo   | 0.060000643        | 1           | Glycerolipids                    | 0      | 0      | .          |
| 53477984 | DG(14:1(9Z)/20:0/0:0)                | HMDB    | Endo   | 3.870176062        | 1           | Glycerolipids                    | 0      | 0      | .          |
| 53477985 | DG(14:1(9Z)/20:1(11Z)/0:0)           | HMDB    | Endo   | 2.819895986        | 1           | Glycerolipids                    | 0      | 0      | .          |
| 53477986 | DG(14:1(9Z)/20:2(11Z,14Z)/0:0)       | HMDB    | Endo   | 1.650040775        | 1           | Eicosanoids                      | 0      | 0      | .          |
| 53477987 | DG(14:1(9Z)/20:3(5Z,8Z,11Z)/0:0)     | HMDB    | Endo   | 0.172993718        | 1           | Eicosanoids                      | 0      | 0      | .          |
| 53477992 | DG(14:1(9Z)/22:0/0:0)                | HMDB    | Endo   | 1.239985889        | 1           | Glycerolipids                    | 0      | 0      | .          |
| 53477993 | DG(14:1(9Z)/22:1(13Z)/0:0)           | HMDB    | Endo   | 4.060069128        | 1           | Glycerolipids                    | 0      | 0      | .          |

| PC_CID   | Chemical                                 | Dataset | Source | Concentration (µM) | No. studies | Class         | PubMed | Biosys | CAS |
|----------|------------------------------------------|---------|--------|--------------------|-------------|---------------|--------|--------|-----|
| 53477994 | DG(14:1(9Z)/22:2(13Z,16Z)/0:0)           | HMDB    | Endo   | 8.100291106        | 1           | Glycerolipids | 0      | 0      | .   |
| 53477995 | DG(14:1(9Z)/22:4(7Z,10Z,13Z,16Z)/0:0)    | HMDB    | Endo   | 0.960981616        | 1           | Glycerolipids | 0      | 0      | .   |
| 53477999 | DG(14:1(9Z)/24:0/0:0)                    | HMDB    | Endo   | 0.013000077        | 1           | Glycerolipids | 0      | 0      | .   |
| 53478000 | DG(14:1(9Z)/24:1(15Z)/0:0)               | HMDB    | Endo   | 0.022000282        | 1           | Glycerolipids | 0      | 0      | .   |
| 18642216 | DG(15:0/15:0/0:0)                        | HMDB    | Endo   | 0.580015762        | 1           | Glycerolipids | 0      | 0      | .   |
| 53478024 | DG(16:0/14:0/0:0)                        | HMDB    | Endo   | 0.580015762        | 1           | Glycerolipids | 0      | 0      | .   |
| 53478025 | DG(16:0/14:1(9Z)/0:0)                    | HMDB    | Endo   | 0.231008678        | 1           | Glycerolipids | 0      | 0      | .   |
| 644078   | DG(16:0/16:0/0:0)                        | HMDB    | Endo   | 1.420061244        | 1           | Glycerolipids | 0      | 0      | .   |
| 9543678  | DG(16:0/16:1(9Z)/0:0)                    | HMDB    | Endo   | 1.070044247        | 1           | Glycerolipids | 0      | 4      | .   |
| 9543688  | DG(16:0/18:0/0:0)                        | HMDB    | Endo   | 1.369985286        | 1           | Glycerolipids | 0      | 4      | .   |
| 9543972  | DG(16:0/18:1(11Z)/0:0)                   | HMDB    | Endo   | 3.870176062        | 1           | Glycerolipids | 0      | 4      | .   |
| 9543695  | DG(16:0/18:2(9Z,12Z)/0:0)                | HMDB    | Endo   | 2.819895986        | 1           | Glycerolipids | 0      | 4      | .   |
| 14275390 | DG(16:0/18:3(6Z,9Z,12Z)/0:0)             | HMDB    | Endo   | 1.650040775        | 1           | Glycerolipids | 0      | 0      | .   |
| 53478027 | DG(16:0/18:4(6Z,9Z,12Z,15Z)/0:0)         | HMDB    | Endo   | 0.172993718        | 1           | Glycerolipids | 0      | 0      | .   |
| 9543710  | DG(16:0/20:0/0:0)                        | HMDB    | Endo   | 0.689974941        | 1           | Glycerolipids | 0      | 4      | .   |
| 9543715  | DG(16:0/20:1(11Z)/0:0)                   | HMDB    | Endo   | 1.239985889        | 1           | Glycerolipids | 0      | 4      | .   |
| 9543721  | DG(16:0/20:2(11Z,14Z)/0:0)               | HMDB    | Endo   | 4.060069128        | 1           | Glycerolipids | 0      | 0      | .   |
| 53478028 | DG(16:0/20:3(5Z,8Z,11Z)/0:0)             | HMDB    | Endo   | 8.100291106        | 1           | Glycerolipids | 0      | 0      | .   |
| 9543736  | DG(16:0/20:4(5Z,8Z,11Z,14Z)/0:0)         | HMDB    | Endo   | 5.279862206        | 1           | Glycerolipids | 0      | 4      | .   |
| 9543744  | DG(16:0/20:5(5Z,8Z,11Z,14Z,17Z)/0:0)     | HMDB    | Endo   | 0.960981616        | 1           | Glycerolipids | 0      | 0      | .   |
| 9543762  | DG(16:0/22:0/0:0)                        | HMDB    | Endo   | 0.003000129        | 1           | Glycerolipids | 0      | 0      | .   |
| 9543772  | DG(16:0/22:1(13Z)/0:0)                   | HMDB    | Endo   | 0.013000077        | 1           | Glycerolipids | 0      | 0      | .   |
| 9543792  | DG(16:0/22:2(13Z,16Z)/0:0)               | HMDB    | Endo   | 0.022000282        | 1           | Glycerolipids | 0      | 0      | .   |
| 9543803  | DG(16:0/22:4(7Z,10Z,13Z,16Z)/0:0)        | HMDB    | Endo   | 0.93997688         | 1           | Glycerolipids | 0      | 0      | .   |
| 53478030 | DG(16:0/22:5(4Z,7Z,10Z,13Z,16Z)/0:0)     | HMDB    | Endo   | 1.609944973        | 1           | Glycerolipids | 0      | 0      | .   |
| 9543827  | DG(16:0/22:6(4Z,7Z,10Z,13Z,16Z,19Z)/0:0) | HMDB    | Endo   | 1.137007715        | 1           | Glycerolipids | 0      | 0      | .   |
| 53478033 | DG(16:1(9Z)/14:0/0:0)                    | HMDB    | Endo   | 0.231008678        | 1           | Glycerolipids | 0      | 0      | .   |
| 53478034 | DG(16:1(9Z)/14:1(9Z)/0:0)                | HMDB    | Endo   | 0.03200062         | 1           | Glycerolipids | 0      | 0      | .   |
| 53478036 | DG(16:1(9Z)/16:0/0:0)                    | HMDB    | Endo   | 1.070044247        | 1           | Glycerolipids | 0      | 0      | .   |
| 9543679  | DG(16:1(9Z)/16:1(9Z)/0:0)                | HMDB    | Endo   | 0.414990355        | 1           | Glycerolipids | 0      | 4      | .   |
| 9543691  | DG(16:1(9Z)/18:0/0:0)                    | HMDB    | Endo   | 3.870176062        | 1           | Glycerolipids | 0      | 4      | .   |

| PC_CID   | Chemical                                 | Dataset | Source | Concentration (µM) | No. studies | Class         | PubMed | Biosys | CAS        |
|----------|------------------------------------------|---------|--------|--------------------|-------------|---------------|--------|--------|------------|
| 53478037 | DG(16:1(9Z)/18:1(11Z)/0:0)               | HMDB    | Endo   | 2.819895986        | 1           | Glycerolipids | 0      | 0      | .          |
| 9543699  | DG(16:1(9Z)/18:2(9Z,12Z)/0:0)            | HMDB    | Endo   | 1.650040775        | 1           | Glycerolipids | 0      | 4      | .          |
| 53478038 | DG(16:1(9Z)/18:3(6Z,9Z,12Z)/0:0)         | HMDB    | Endo   | 0.172993718        | 1           | Glycerolipids | 0      | 0      | .          |
| 9543714  | DG(16:1(9Z)/20:0/0:0)                    | HMDB    | Endo   | 1.239985889        | 1           | Glycerolipids | 0      | 4      | .          |
| 9543720  | DG(16:1(9Z)/20:1(11Z)/0:0)               | HMDB    | Endo   | 4.060069128        | 1           | Glycerolipids | 0      | 4      | .          |
| 9543727  | DG(16:1(9Z)/20:2(11Z,14Z)/0:0)           | HMDB    | Endo   | 8.100291106        | 1           | Glycerolipids | 0      | 0      | .          |
| 53478040 | DG(16:1(9Z)/20:3(5Z,8Z,11Z)/0:0)         | HMDB    | Endo   | 5.279862206        | 1           | Glycerolipids | 0      | 0      | .          |
| 9543743  | DG(16:1(9Z)/20:4(5Z,8Z,11Z,14Z)/0:0)     | HMDB    | Endo   | 0.960981616        | 1           | Glycerolipids | 0      | 4      | .          |
| 9543771  | DG(16:1(9Z)/22:0/0:0)                    | HMDB    | Endo   | 0.013000077        | 1           | Glycerolipids | 0      | 0      | .          |
| 9543780  | DG(16:1(9Z)/22:1(13Z)/0:0)               | HMDB    | Endo   | 0.022000282        | 1           | Glycerolipids | 0      | 0      | .          |
| 9543802  | DG(16:1(9Z)/22:2(13Z,16Z)/0:0)           | HMDB    | Endo   | 0.279990389        | 1           | Glycerolipids | 0      | 0      | .          |
| 9543814  | DG(16:1(9Z)/22:4(7Z,10Z,13Z,16Z)/0:0)    | HMDB    | Endo   | 1.609944973        | 1           | Glycerolipids | 0      | 0      | .          |
| 53478042 | DG(16:1(9Z)/22:5(4Z,7Z,10Z,13Z,16Z)/0:0) | HMDB    | Endo   | 1.137007715        | 1           | Glycerolipids | 0      | 0      | .          |
| 53478045 | DG(18:0/14:0/0:0)                        | HMDB    | Endo   | 1.420061244        | 1           | Glycerolipids | 0      | 0      | .          |
| 53478046 | DG(18:0/14:1(9Z)/0:0)                    | HMDB    | Endo   | 1.070044247        | 1           | Glycerolipids | 0      | 0      | .          |
| 3246945  | DG(18:0/16:0/0:0)                        | HMDB    | Endo   | 1.369985286        | 1           | Glycerolipids | 0      | 4      | .          |
| 53478048 | DG(18:0/16:1(9Z)/0:0)                    | HMDB    | Endo   | 3.870176062        | 1           | Glycerolipids | 0      | 0      | .          |
| 9543705  | DG(18:0/18:0/0:0)                        | HMDB    | Endo   | 0.689974941        | 1           | Glycerolipids | 0      | 0      | 10567-21-2 |
| 53478049 | DG(18:0/18:1(11Z)/0:0)                   | HMDB    | Endo   | 1.239985889        | 1           | Glycerolipids | 0      | 0      | .          |
| 6441562  | DG(18:0/18:2(9Z,12Z)/0:0)                | HMDB    | Endo   | 4.060069128        | 1           | Glycerolipids | 0      | 4      | 34487-26-8 |
| 53478050 | DG(18:0/18:3(6Z,9Z,12Z)/0:0)             | HMDB    | Endo   | 8.100291106        | 1           | Glycerolipids | 0      | 0      | .          |
| 53478051 | DG(18:0/18:4(6Z,9Z,12Z,15Z)/0:0)         | HMDB    | Endo   | 5.279862206        | 1           | Glycerolipids | 0      | 0      | .          |
| 9543739  | DG(18:0/20:0/0:0)                        | HMDB    | Endo   | 0.003000129        | 1           | Glycerolipids | 0      | 4      | .          |
| 9543748  | DG(18:0/20:1(11Z)/0:0)                   | HMDB    | Endo   | 0.013000077        | 1           | Glycerolipids | 0      | 4      | .          |
| 9543757  | DG(18:0/20:2(11Z,14Z)/0:0)               | HMDB    | Endo   | 0.022000282        | 1           | Glycerolipids | 0      | 0      | .          |
| 53478052 | DG(18:0/20:3(5Z,8Z,11Z)/0:0)             | HMDB    | Endo   | 0.279990389        | 1           | Glycerolipids | 0      | 0      | .          |
| 6438587  | DG(18:0/20:4(5Z,8Z,11Z,14Z)/0:0)         | HMDB    | Endo   | 0.93997688         | 1           | Glycerolipids | 0      | 4      | .          |
| 9543787  | DG(18:0/20:5(5Z,8Z,11Z,14Z,17Z)/0:0)     | HMDB    | Endo   | 1.609944973        | 1           | Glycerolipids | 0      | 0      | .          |
| 9543859  | DG(18:0/22:4(7Z,10Z,13Z,16Z)/0:0)        | HMDB    | Endo   | 0.036001308        | 1           | Glycerolipids | 0      | 0      | .          |
| 9543881  | DG(18:0/22:6(4Z,7Z,10Z,13Z,16Z,19Z)/0:0) | HMDB    | Endo   | 0.254005337        | 1           | Glycerolipids | 0      | 0      | .          |
| 53478057 | DG(18:1(11Z)/14:0/0:0)                   | HMDB    | Endo   | 1.070044247        | 1           | Glycerolipids | 0      | 0      | .          |



| PC_CID   | Chemical                                      | Dataset | Source | Concentration (µM) | No. studies | Class         | PubMed | Biosys | CAS        |
|----------|-----------------------------------------------|---------|--------|--------------------|-------------|---------------|--------|--------|------------|
| 53478058 | DG(18:1(11Z)/14:1(9Z)/0:0)                    | HMDB    | Endo   | 0.414990355        | 1           | Glycerolipids | 0      | 0      | .          |
| 53478060 | DG(18:1(11Z)/16:0/0:0)                        | HMDB    | Endo   | 3.870176062        | 1           | Glycerolipids | 0      | 0      | .          |
| 53478061 | DG(18:1(11Z)/16:1(9Z)/0:0)                    | HMDB    | Endo   | 2.819895986        | 1           | Glycerolipids | 0      | 0      | .          |
| 53478062 | DG(18:1(11Z)/18:0/0:0)                        | HMDB    | Endo   | 1.239985889        | 1           | Glycerolipids | 0      | 0      | .          |
| 53478063 | DG(18:1(11Z)/18:1(11Z)/0:0)                   | HMDB    | Endo   | 4.060069128        | 1           | Glycerolipids | 0      | 0      | .          |
| 53478065 | DG(18:1(11Z)/18:2(9Z,12Z)/0:0)                | HMDB    | Endo   | 8.100291106        | 1           | Glycerolipids | 0      | 0      | .          |
| 53478066 | DG(18:1(11Z)/18:3(6Z,9Z,12Z)/0:0)             | HMDB    | Endo   | 5.279862206        | 1           | Glycerolipids | 0      | 0      | .          |
| 53478068 | DG(18:1(11Z)/18:4(6Z,9Z,12Z,15Z)/0:0)         | HMDB    | Endo   | 0.960981616        | 1           | Glycerolipids | 0      | 0      | .          |
| 53478069 | DG(18:1(11Z)/20:0/0:0)                        | HMDB    | Endo   | 0.013000077        | 1           | Glycerolipids | 0      | 0      | .          |
| 53478070 | DG(18:1(11Z)/20:1(11Z)/0:0)                   | HMDB    | Endo   | 0.022000282        | 1           | Glycerolipids | 0      | 0      | .          |
| 53478071 | DG(18:1(11Z)/20:2(11Z,14Z)/0:0)               | HMDB    | Endo   | 0.279990389        | 1           | Glycerolipids | 0      | 0      | .          |
| 53478072 | DG(18:1(11Z)/20:3(5Z,8Z,11Z)/0:0)             | HMDB    | Endo   | 0.93997688         | 1           | Glycerolipids | 0      | 0      | .          |
| 53478074 | DG(18:1(11Z)/20:4(5Z,8Z,11Z,14Z)/0:0)         | HMDB    | Endo   | 1.609944973        | 1           | Glycerolipids | 0      | 0      | .          |
| 53478076 | DG(18:1(11Z)/20:5(5Z,8Z,11Z,14Z,17Z)/0:0)     | HMDB    | Endo   | 1.137007715        | 1           | Glycerolipids | 0      | 0      | .          |
| 53478081 | DG(18:1(11Z)/22:5(4Z,7Z,10Z,13Z,16Z)/0:0)     | HMDB    | Endo   | 0.254005337        | 1           | Glycerolipids | 0      | 0      | .          |
| 53478083 | DG(18:1(11Z)/22:6(4Z,7Z,10Z,13Z,16Z,19Z)/0:0) | HMDB    | Endo   | 0.309994724        | 1           | Glycerolipids | 0      | 0      | .          |
| 53478098 | DG(18:2(9Z,12Z)/14:0/0:0)                     | HMDB    | Endo   | 0.414990355        | 1           | Glycerolipids | 0      | 0      | .          |
| 53478099 | DG(18:2(9Z,12Z)/14:1(9Z)/0:0)                 | HMDB    | Endo   | 0.060000643        | 1           | Glycerolipids | 0      | 0      | .          |
| 53478101 | DG(18:2(9Z,12Z)/16:0/0:0)                     | HMDB    | Endo   | 2.819895986        | 1           | Glycerolipids | 0      | 0      | .          |
| 53478102 | DG(18:2(9Z,12Z)/16:1(9Z)/0:0)                 | HMDB    | Endo   | 1.650040775        | 1           | Glycerolipids | 0      | 0      | .          |
| 53478103 | DG(18:2(9Z,12Z)/18:0/0:0)                     | HMDB    | Endo   | 4.060069128        | 1           | Glycerolipids | 0      | 0      | .          |
| 53478104 | DG(18:2(9Z,12Z)/18:1(11Z)/0:0)                | HMDB    | Endo   | 8.100291106        | 1           | Glycerolipids | 0      | 0      | .          |
| 9543729  | DG(18:2(9Z,12Z)/18:2(9Z,12Z)/0:0)             | HMDB    | Endo   | 5.279862206        | 1           | Glycerolipids | 0      | 4      | 24529-89-3 |
| 14275409 | DG(18:2(9Z,12Z)/18:3(6Z,9Z,12Z)/0:0)          | HMDB    | Endo   | 0.960981616        | 1           | Glycerolipids | 0      | 0      | .          |
| 9543755  | DG(18:2(9Z,12Z)/20:0/0:0)                     | HMDB    | Endo   | 0.022000282        | 1           | Glycerolipids | 0      | 4      | .          |
| 9543765  | DG(18:2(9Z,12Z)/20:1(11Z)/0:0)                | HMDB    | Endo   | 0.279990389        | 1           | Glycerolipids | 0      | 4      | .          |
| 9543775  | DG(18:2(9Z,12Z)/20:2(11Z,14Z)/0:0)            | HMDB    | Endo   | 0.93997688         | 1           | Glycerolipids | 0      | 0      | .          |
| 53478107 | DG(18:2(9Z,12Z)/20:3(5Z,8Z,11Z)/0:0)          | HMDB    | Endo   | 1.609944973        | 1           | Glycerolipids | 0      | 0      | .          |
| 9543796  | DG(18:2(9Z,12Z)/20:4(5Z,8Z,11Z,14Z)/0:0)      | HMDB    | Endo   | 1.137007715        | 1           | Glycerolipids | 0      | 4      | .          |
| 9543868  | DG(18:2(9Z,12Z)/22:2(13Z,16Z)/0:0)            | HMDB    | Endo   | 0.036001308        | 1           | Glycerolipids | 0      | 0      | .          |
| 9543879  | DG(18:2(9Z,12Z)/22:4(7Z,10Z,13Z,16Z)/0:0)     | HMDB    | Endo   | 0.254005337        | 1           | Glycerolipids | 0      | 0      | .          |

| PC_CID   | Chemical                                     | Dataset | Source | Concentration (µM) | No. studies | Class         | PubMed | Biosys | CAS |
|----------|----------------------------------------------|---------|--------|--------------------|-------------|---------------|--------|--------|-----|
| 53478109 | DG(18:2(9Z,12Z)/22:5(4Z,7Z,10Z,13Z,16Z)/0:0) | HMDB    | Endo   | 0.309994724        | 1           | Glycerolipids | 0      | 0      | .   |
| 53478112 | DG(18:3(6Z,9Z,12Z)/14:0/0:0)                 | HMDB    | Endo   | 0.060000643        | 1           | Glycerolipids | 0      | 0      | .   |
| 53478115 | DG(18:3(6Z,9Z,12Z)/16:0/0:0)                 | HMDB    | Endo   | 1.650040775        | 1           | Glycerolipids | 0      | 0      | .   |
| 53478116 | DG(18:3(6Z,9Z,12Z)/16:1(9Z)/0:0)             | HMDB    | Endo   | 0.172993718        | 1           | Glycerolipids | 0      | 0      | .   |
| 53478117 | DG(18:3(6Z,9Z,12Z)/18:0/0:0)                 | HMDB    | Endo   | 8.100291106        | 1           | Glycerolipids | 0      | 0      | .   |
| 53478118 | DG(18:3(6Z,9Z,12Z)/18:1(11Z)/0:0)            | HMDB    | Endo   | 5.279862206        | 1           | Glycerolipids | 0      | 0      | .   |
| 53478120 | DG(18:3(6Z,9Z,12Z)/18:2(9Z,12Z)/0:0)         | HMDB    | Endo   | 0.960981616        | 1           | Glycerolipids | 0      | 0      | .   |
| 53478123 | DG(18:3(6Z,9Z,12Z)/20:0/0:0)                 | HMDB    | Endo   | 0.279990389        | 1           | Glycerolipids | 0      | 0      | .   |
| 53478124 | DG(18:3(6Z,9Z,12Z)/20:1(11Z)/0:0)            | HMDB    | Endo   | 0.93997688         | 1           | Glycerolipids | 0      | 0      | .   |
| 53478125 | DG(18:3(6Z,9Z,12Z)/20:2(11Z,14Z)/0:0)        | HMDB    | Endo   | 1.609944973        | 1           | Glycerolipids | 0      | 0      | .   |
| 53478126 | DG(18:3(6Z,9Z,12Z)/20:3(5Z,8Z,11Z)/0:0)      | HMDB    | Endo   | 1.137007715        | 1           | Glycerolipids | 0      | 0      | .   |
| 53478132 | DG(18:3(6Z,9Z,12Z)/22:1(13Z)/0:0)            | HMDB    | Endo   | 0.036001308        | 1           | Glycerolipids | 0      | 0      | .   |
| 53478134 | DG(18:3(6Z,9Z,12Z)/22:4(7Z,10Z,13Z,16Z)/0:0) | HMDB    | Endo   | 0.309994724        | 1           | Glycerolipids | 0      | 0      | .   |
| 53478140 | DG(18:3(9Z,12Z,15Z)/14:0/0:0)                | HMDB    | Endo   | 0.060000643        | 1           | Glycerolipids | 0      | 0      | .   |
| 53478159 | DG(18:4(6Z,9Z,12Z,15Z)/16:0/0:0)             | HMDB    | Endo   | 0.172993718        | 1           | Glycerolipids | 0      | 0      | .   |
| 53478161 | DG(18:4(6Z,9Z,12Z,15Z)/18:0/0:0)             | HMDB    | Endo   | 5.279862206        | 1           | Glycerolipids | 0      | 0      | .   |
| 53478162 | DG(18:4(6Z,9Z,12Z,15Z)/18:1(11Z)/0:0)        | HMDB    | Endo   | 0.960981616        | 1           | Glycerolipids | 0      | 0      | .   |
| 53478168 | DG(18:4(6Z,9Z,12Z,15Z)/20:0/0:0)             | HMDB    | Endo   | 0.93997688         | 1           | Glycerolipids | 0      | 0      | .   |
| 53478169 | DG(18:4(6Z,9Z,12Z,15Z)/20:1(11Z)/0:0)        | HMDB    | Endo   | 1.609944973        | 1           | Glycerolipids | 0      | 0      | .   |
| 53478170 | DG(18:4(6Z,9Z,12Z,15Z)/20:2(11Z,14Z)/0:0)    | HMDB    | Endo   | 1.137007715        | 1           | Glycerolipids | 0      | 0      | .   |
| 53478176 | DG(18:4(6Z,9Z,12Z,15Z)/22:0/0:0)             | HMDB    | Endo   | 0.036001308        | 1           | Glycerolipids | 0      | 0      | .   |
| 53478178 | DG(18:4(6Z,9Z,12Z,15Z)/22:2(13Z,16Z)/0:0)    | HMDB    | Endo   | 0.254005337        | 1           | Glycerolipids | 0      | 0      | .   |
| 53478185 | DG(20:0/14:0/0:0)                            | HMDB    | Endo   | 1.369985286        | 1           | Glycerolipids | 0      | 0      | .   |
| 53478186 | DG(20:0/14:1(9Z)/0:0)                        | HMDB    | Endo   | 3.870176062        | 1           | Glycerolipids | 0      | 0      | .   |
| 53478188 | DG(20:0/16:0/0:0)                            | HMDB    | Endo   | 0.689974941        | 1           | Glycerolipids | 0      | 0      | .   |
| 53478189 | DG(20:0/16:1(9Z)/0:0)                        | HMDB    | Endo   | 1.239985889        | 1           | Glycerolipids | 0      | 0      | .   |
| 3246949  | DG(20:0/18:0/0:0)                            | HMDB    | Endo   | 0.003000129        | 1           | Glycerolipids | 0      | 0      | .   |
| 53478190 | DG(20:0/18:1(11Z)/0:0)                       | HMDB    | Endo   | 0.013000077        | 1           | Glycerolipids | 0      | 0      | .   |
| 53478192 | DG(20:0/18:2(9Z,12Z)/0:0)                    | HMDB    | Endo   | 0.022000282        | 1           | Glycerolipids | 0      | 0      | .   |
| 53478193 | DG(20:0/18:3(6Z,9Z,12Z)/0:0)                 | HMDB    | Endo   | 0.279990389        | 1           | Glycerolipids | 0      | 0      | .   |
| 53478195 | DG(20:0/18:4(6Z,9Z,12Z,15Z)/0:0)             | HMDB    | Endo   | 0.93997688         | 1           | Glycerolipids | 0      | 0      | .   |

| PC_CID   | Chemical                                      | Dataset | Source | Concentration (µM) | No. studies | Class         | PubMed | Biosys | CAS |
|----------|-----------------------------------------------|---------|--------|--------------------|-------------|---------------|--------|--------|-----|
| 9543830  | DG(20:0/20:4(5Z,8Z,11Z,14Z)/0:0)              | HMDB    | Endo   | 0.036001308        | 1           | Glycerolipids | 0      | 4      | .   |
| 53478201 | DG(20:1(11Z)/14:0/0:0)                        | HMDB    | Endo   | 3.870176062        | 1           | Glycerolipids | 0      | 0      | .   |
| 53478202 | DG(20:1(11Z)/14:1(9Z)/0:0)                    | HMDB    | Endo   | 2.819895986        | 1           | Glycerolipids | 0      | 0      | .   |
| 53478204 | DG(20:1(11Z)/16:0/0:0)                        | HMDB    | Endo   | 1.239985889        | 1           | Glycerolipids | 0      | 0      | .   |
| 53478205 | DG(20:1(11Z)/16:1(9Z)/0:0)                    | HMDB    | Endo   | 4.060069128        | 1           | Glycerolipids | 0      | 0      | .   |
| 53478206 | DG(20:1(11Z)/18:0/0:0)                        | HMDB    | Endo   | 0.013000077        | 1           | Glycerolipids | 0      | 0      | .   |
| 53478207 | DG(20:1(11Z)/18:1(11Z)/0:0)                   | HMDB    | Endo   | 0.022000282        | 1           | Glycerolipids | 0      | 0      | .   |
| 53478209 | DG(20:1(11Z)/18:2(9Z,12Z)/0:0)                | HMDB    | Endo   | 0.279990389        | 1           | Glycerolipids | 0      | 0      | .   |
| 53478210 | DG(20:1(11Z)/18:3(6Z,9Z,12Z)/0:0)             | HMDB    | Endo   | 0.93997688         | 1           | Glycerolipids | 0      | 0      | .   |
| 53478212 | DG(20:1(11Z)/18:4(6Z,9Z,12Z,15Z)/0:0)         | HMDB    | Endo   | 1.609944973        | 1           | Glycerolipids | 0      | 0      | .   |
| 53478214 | DG(20:1(11Z)/20:3(5Z,8Z,11Z)/0:0)             | HMDB    | Endo   | 0.036001308        | 1           | Glycerolipids | 0      | 0      | .   |
| 9543853  | DG(20:1(11Z)/20:5(5Z,8Z,11Z,14Z,17Z)/0:0)     | HMDB    | Endo   | 0.254005337        | 1           | Glycerolipids | 0      | 0      | .   |
| 53478219 | DG(20:2(11Z,14Z)/14:0/0:0)                    | HMDB    | Endo   | 2.819895986        | 1           | Glycerolipids | 0      | 0      | .   |
| 53478220 | DG(20:2(11Z,14Z)/14:1(9Z)/0:0)                | HMDB    | Endo   | 1.650040775        | 1           | Glycerolipids | 0      | 0      | .   |
| 53478222 | DG(20:2(11Z,14Z)/16:0/0:0)                    | HMDB    | Endo   | 4.060069128        | 1           | Glycerolipids | 0      | 0      | .   |
| 53478223 | DG(20:2(11Z,14Z)/16:1(9Z)/0:0)                | HMDB    | Endo   | 8.100291106        | 1           | Glycerolipids | 0      | 0      | .   |
| 53478224 | DG(20:2(11Z,14Z)/18:0/0:0)                    | HMDB    | Endo   | 0.022000282        | 1           | Glycerolipids | 0      | 0      | .   |
| 53478225 | DG(20:2(11Z,14Z)/18:1(11Z)/0:0)               | HMDB    | Endo   | 0.279990389        | 1           | Glycerolipids | 0      | 0      | .   |
| 53478227 | DG(20:2(11Z,14Z)/18:2(9Z,12Z)/0:0)            | HMDB    | Endo   | 0.93997688         | 1           | Glycerolipids | 0      | 0      | .   |
| 53478228 | DG(20:2(11Z,14Z)/18:3(6Z,9Z,12Z)/0:0)         | HMDB    | Endo   | 1.609944973        | 1           | Glycerolipids | 0      | 0      | .   |
| 53478230 | DG(20:2(11Z,14Z)/18:4(6Z,9Z,12Z,15Z)/0:0)     | HMDB    | Endo   | 1.137007715        | 1           | Glycerolipids | 0      | 0      | .   |
| 9543828  | DG(20:2(11Z,14Z)/20:2(11Z,14Z)/0:0)           | HMDB    | Endo   | 0.036001308        | 1           | Glycerolipids | 0      | 0      | .   |
| 9543852  | DG(20:2(11Z,14Z)/20:4(5Z,8Z,11Z,14Z)/0:0)     | HMDB    | Endo   | 0.254005337        | 1           | Glycerolipids | 0      | 0      | .   |
| 9543863  | DG(20:2(11Z,14Z)/20:5(5Z,8Z,11Z,14Z,17Z)/0:0) | HMDB    | Endo   | 0.309994724        | 1           | Glycerolipids | 0      | 0      | .   |
| 53478238 | DG(20:3(5Z,8Z,11Z)/14:0/0:0)                  | HMDB    | Endo   | 1.650040775        | 1           | Glycerolipids | 0      | 0      | .   |
| 53478239 | DG(20:3(5Z,8Z,11Z)/14:1(9Z)/0:0)              | HMDB    | Endo   | 0.172993718        | 1           | Glycerolipids | 0      | 0      | .   |
| 53478241 | DG(20:3(5Z,8Z,11Z)/16:0/0:0)                  | HMDB    | Endo   | 8.100291106        | 1           | Glycerolipids | 0      | 0      | .   |
| 53478242 | DG(20:3(5Z,8Z,11Z)/16:1(9Z)/0:0)              | HMDB    | Endo   | 5.279862206        | 1           | Glycerolipids | 0      | 0      | .   |
| 53478243 | DG(20:3(5Z,8Z,11Z)/18:0/0:0)                  | HMDB    | Endo   | 0.279990389        | 1           | Glycerolipids | 0      | 0      | .   |
| 53478244 | DG(20:3(5Z,8Z,11Z)/18:1(11Z)/0:0)             | HMDB    | Endo   | 0.93997688         | 1           | Glycerolipids | 0      | 0      | .   |
| 53478246 | DG(20:3(5Z,8Z,11Z)/18:2(9Z,12Z)/0:0)          | HMDB    | Endo   | 1.609944973        | 1           | Glycerolipids | 0      | 0      | .   |

| PC_CID   | Chemical                                      | Dataset | Source | Concentration (µM) | No. studies | Class         | PubMed | Biosys | CAS |
|----------|-----------------------------------------------|---------|--------|--------------------|-------------|---------------|--------|--------|-----|
| 53478247 | DG(20:3(5Z,8Z,11Z)/18:3(6Z,9Z,12Z)/0:0)       | HMDB    | Endo   | 1.137007715        | 1           | Glycerolipids | 0      | 0      | .   |
| 53478251 | DG(20:3(5Z,8Z,11Z)/20:1(11Z)/0:0)             | HMDB    | Endo   | 0.036001308        | 1           | Glycerolipids | 0      | 0      | .   |
| 53478253 | DG(20:3(5Z,8Z,11Z)/20:3(5Z,8Z,11Z)/0:0)       | HMDB    | Endo   | 0.254005337        | 1           | Glycerolipids | 0      | 0      | .   |
| 53478255 | DG(20:3(5Z,8Z,11Z)/20:4(5Z,8Z,11Z,14Z)/0:0)   | HMDB    | Endo   | 0.309994724        | 1           | Glycerolipids | 0      | 0      | .   |
| 53478280 | DG(20:3(8Z,11Z,14Z)/20:1(11Z)/0:0)            | HMDB    | Endo   | 0.036001308        | 1           | Glycerolipids | 0      | 0      | .   |
| 53478287 | DG(20:4(5Z,8Z,11Z,14Z)/14:0/0:0)              | HMDB    | Endo   | 0.172993718        | 1           | Glycerolipids | 0      | 0      | .   |
| 53478290 | DG(20:4(5Z,8Z,11Z,14Z)/16:0/0:0)              | HMDB    | Endo   | 5.279862206        | 1           | Glycerolipids | 0      | 0      | .   |
| 53478291 | DG(20:4(5Z,8Z,11Z,14Z)/16:1(9Z)/0:0)          | HMDB    | Endo   | 0.960981616        | 1           | Glycerolipids | 0      | 0      | .   |
| 53478292 | DG(20:4(5Z,8Z,11Z,14Z)/18:0/0:0)              | HMDB    | Endo   | 0.93997688         | 1           | Glycerolipids | 0      | 0      | .   |
| 53478293 | DG(20:4(5Z,8Z,11Z,14Z)/18:1(11Z)/0:0)         | HMDB    | Endo   | 1.609944973        | 1           | Glycerolipids | 0      | 0      | .   |
| 53478295 | DG(20:4(5Z,8Z,11Z,14Z)/18:2(9Z,12Z)/0:0)      | HMDB    | Endo   | 1.137007715        | 1           | Glycerolipids | 0      | 0      | .   |
| 53478299 | DG(20:4(5Z,8Z,11Z,14Z)/20:0/0:0)              | HMDB    | Endo   | 0.036001308        | 1           | Glycerolipids | 0      | 0      | .   |
| 53478301 | DG(20:4(5Z,8Z,11Z,14Z)/20:2(11Z,14Z)/0:0)     | HMDB    | Endo   | 0.254005337        | 1           | Glycerolipids | 0      | 0      | .   |
| 53478302 | DG(20:4(5Z,8Z,11Z,14Z)/20:3(5Z,8Z,11Z)/0:0)   | HMDB    | Endo   | 0.309994724        | 1           | Glycerolipids | 0      | 0      | .   |
| 53478340 | DG(20:5(5Z,8Z,11Z,14Z,17Z)/16:0/0:0)          | HMDB    | Endo   | 0.960981616        | 1           | Glycerolipids | 0      | 0      | .   |
| 53478342 | DG(20:5(5Z,8Z,11Z,14Z,17Z)/18:0/0:0)          | HMDB    | Endo   | 1.609944973        | 1           | Glycerolipids | 0      | 0      | .   |
| 53478343 | DG(20:5(5Z,8Z,11Z,14Z,17Z)/18:1(11Z)/0:0)     | HMDB    | Endo   | 1.137007715        | 1           | Glycerolipids | 0      | 0      | .   |
| 53478350 | DG(20:5(5Z,8Z,11Z,14Z,17Z)/20:1(11Z)/0:0)     | HMDB    | Endo   | 0.254005337        | 1           | Glycerolipids | 0      | 0      | .   |
| 53478351 | DG(20:5(5Z,8Z,11Z,14Z,17Z)/20:2(11Z,14Z)/0:0) | HMDB    | Endo   | 0.309994724        | 1           | Glycerolipids | 0      | 0      | .   |
| 53478359 | DG(22:0/14:0/0:0)                             | HMDB    | Endo   | 0.689974941        | 1           | Glycerolipids | 0      | 0      | .   |
| 53478360 | DG(22:0/14:1(9Z)/0:0)                         | HMDB    | Endo   | 1.239985889        | 1           | Glycerolipids | 0      | 0      | .   |
| 53478362 | DG(22:0/16:0/0:0)                             | HMDB    | Endo   | 0.003000129        | 1           | Glycerolipids | 0      | 0      | .   |
| 53478363 | DG(22:0/16:1(9Z)/0:0)                         | HMDB    | Endo   | 0.013000077        | 1           | Glycerolipids | 0      | 0      | .   |
| 53478370 | DG(22:0/18:4(6Z,9Z,12Z,15Z)/0:0)              | HMDB    | Endo   | 0.036001308        | 1           | Glycerolipids | 0      | 0      | .   |
| 53478382 | DG(22:1(13Z)/14:0/0:0)                        | HMDB    | Endo   | 1.239985889        | 1           | Glycerolipids | 0      | 0      | .   |
| 53478383 | DG(22:1(13Z)/14:1(9Z)/0:0)                    | HMDB    | Endo   | 4.060069128        | 1           | Glycerolipids | 0      | 0      | .   |
| 53478385 | DG(22:1(13Z)/16:0/0:0)                        | HMDB    | Endo   | 0.013000077        | 1           | Glycerolipids | 0      | 0      | .   |
| 53478386 | DG(22:1(13Z)/16:1(9Z)/0:0)                    | HMDB    | Endo   | 0.022000282        | 1           | Glycerolipids | 0      | 0      | .   |
| 53478391 | DG(22:1(13Z)/18:3(6Z,9Z,12Z)/0:0)             | HMDB    | Endo   | 0.036001308        | 1           | Glycerolipids | 0      | 0      | .   |
| 53478406 | DG(22:2(13Z,16Z)/14:0/0:0)                    | HMDB    | Endo   | 4.060069128        | 1           | Glycerolipids | 0      | 0      | .   |
| 53478407 | DG(22:2(13Z,16Z)/14:1(9Z)/0:0)                | HMDB    | Endo   | 8.100291106        | 1           | Glycerolipids | 0      | 0      | .   |

| PC_CID   | Chemical                                      | Dataset | Source | Concentration (µM) | No. studies | Class                                    | PubMed | Biosys | CAS                          |
|----------|-----------------------------------------------|---------|--------|--------------------|-------------|------------------------------------------|--------|--------|------------------------------|
| 53478409 | DG(22:2(13Z,16Z)/16:0/0:0)                    | HMDB    | Endo   | 0.022000282        | 1           | Glycerolipids                            | 0      | 0      | .                            |
| 53478410 | DG(22:2(13Z,16Z)/16:1(9Z)/0:0)                | HMDB    | Endo   | 0.279990389        | 1           | Glycerolipids                            | 0      | 0      | .                            |
| 53478414 | DG(22:2(13Z,16Z)/18:2(9Z,12Z)/0:0)            | HMDB    | Endo   | 0.036001308        | 1           | Glycerolipids                            | 0      | 0      | .                            |
| 53478417 | DG(22:2(13Z,16Z)/18:4(6Z,9Z,12Z,15Z)/0:0)     | HMDB    | Endo   | 0.254005337        | 1           | Glycerolipids                            | 0      | 0      | .                            |
| 53478431 | DG(22:4(7Z,10Z,13Z,16Z)/14:0/0:0)             | HMDB    | Endo   | 5.279862206        | 1           | Glycerolipids                            | 0      | 0      | .                            |
| 53478432 | DG(22:4(7Z,10Z,13Z,16Z)/14:1(9Z)/0:0)         | HMDB    | Endo   | 0.960981616        | 1           | Glycerolipids                            | 0      | 0      | .                            |
| 53478434 | DG(22:4(7Z,10Z,13Z,16Z)/16:0/0:0)             | HMDB    | Endo   | 0.93997688         | 1           | Glycerolipids                            | 0      | 0      | .                            |
| 53478435 | DG(22:4(7Z,10Z,13Z,16Z)/16:1(9Z)/0:0)         | HMDB    | Endo   | 1.609944973        | 1           | Glycerolipids                            | 0      | 0      | .                            |
| 53478436 | DG(22:4(7Z,10Z,13Z,16Z)/18:0/0:0)             | HMDB    | Endo   | 0.036001308        | 1           | Glycerolipids                            | 0      | 0      | .                            |
| 53478439 | DG(22:4(7Z,10Z,13Z,16Z)/18:2(9Z,12Z)/0:0)     | HMDB    | Endo   | 0.254005337        | 1           | Glycerolipids                            | 0      | 0      | .                            |
| 53478440 | DG(22:4(7Z,10Z,13Z,16Z)/18:3(6Z,9Z,12Z)/0:0)  | HMDB    | Endo   | 0.309994724        | 1           | Glycerolipids                            | 0      | 0      | .                            |
| 53478457 | DG(22:5(4Z,7Z,10Z,13Z,16Z)/14:0/0:0)          | HMDB    | Endo   | 0.960981616        | 1           | Glycerolipids                            | 0      | 0      | .                            |
| 53478460 | DG(22:5(4Z,7Z,10Z,13Z,16Z)/16:0/0:0)          | HMDB    | Endo   | 1.609944973        | 1           | Glycerolipids                            | 0      | 0      | .                            |
| 53478461 | DG(22:5(4Z,7Z,10Z,13Z,16Z)/16:1(9Z)/0:0)      | HMDB    | Endo   | 1.137007715        | 1           | Glycerolipids                            | 0      | 0      | .                            |
| 53478463 | DG(22:5(4Z,7Z,10Z,13Z,16Z)/18:1(11Z)/0:0)     | HMDB    | Endo   | 0.254005337        | 1           | Glycerolipids                            | 0      | 0      | .                            |
| 53478465 | DG(22:5(4Z,7Z,10Z,13Z,16Z)/18:2(9Z,12Z)/0:0)  | HMDB    | Endo   | 0.309994724        | 1           | Glycerolipids                            | 0      | 0      | .                            |
| 53478516 | DG(22:6(4Z,7Z,10Z,13Z,16Z,19Z)/16:0/0:0)      | HMDB    | Endo   | 1.137007715        | 1           | Glycerolipids                            | 0      | 0      | .                            |
| 53478518 | DG(22:6(4Z,7Z,10Z,13Z,16Z,19Z)/18:0/0:0)      | HMDB    | Endo   | 0.254005337        | 1           | Glycerolipids                            | 0      | 0      | .                            |
| 53478519 | DG(22:6(4Z,7Z,10Z,13Z,16Z,19Z)/18:1(11Z)/0:0) | HMDB    | Endo   | 0.309994724        | 1           | Glycerolipids                            | 0      | 0      | .                            |
| 53478541 | DG(24:0/14:0/0:0)                             | HMDB    | Endo   | 0.003000129        | 1           | Glycerolipids                            | 0      | 0      | .                            |
| 53478542 | DG(24:0/14:1(9Z)/0:0)                         | HMDB    | Endo   | 0.013000077        | 1           | Glycerolipids                            | 0      | 0      | .                            |
| 53478570 | DG(24:1(15Z)/14:0/0:0)                        | HMDB    | Endo   | 0.013000077        | 1           | Glycerolipids                            | 0      | 0      | .                            |
| 53478571 | DG(24:1(15Z)/14:1(9Z)/0:0)                    | HMDB    | Endo   | 0.022000282        | 1           | Glycerolipids                            | 0      | 0      | .                            |
| 439357   | D-Galactose                                   | HMDB    | Endo   | 58.68592972        | 2           | Monosaccharides                          | 0      | 25     | 3646-73-9                    |
| 79025    | D-Glucose                                     | HMDB    | Endo   | 4801.098381        | 11          | Monosaccharides                          | 247    | 45     | 50-99-7                      |
| 94715    | D-Glucuronic acid                             | HMDB    | Endo   | 164.992497         | 1           | Sugar Acids and Derivatives              | 0      | 6      | 6556-12-3                    |
| 24794350 | D-Glyceraldehyde 3-phosphate                  | HMDB    | Endo   | 4.799923595        | 1           | Organic Phosphoric Acids and Derivatives | 0      | 6      | 142-10-9                     |
| 12594    | DHEA sulfate                                  | HMDB    | Endo   | 3.951518755        | 2           | Steroids and Steroid Derivatives         | 110    | 16     | 651-48-9,1099-87-2,1095-56-3 |
| 31296    | Dibromochloromethane                          | NHANES  | Pollut | 4.16248E-06        | 1           | Organochlorides                          | 0      | 0      | 124-48-1                     |
| 2724385  | Digoxin                                       | HMDB    | Drug   | 0.000700021        | 1           | Steroids and Steroid Derivatives         | 43     | 5      | 20830-75-5                   |

| PC_CID  | Chemical                             | Dataset | Source | Concentration (µM) | No. studies | Class                                    | PubMed | Biosys | CAS                                                           |
|---------|--------------------------------------|---------|--------|--------------------|-------------|------------------------------------------|--------|--------|---------------------------------------------------------------|
| 5282272 | Dihomo-gamma-Linolenoyl ethanolamide | HMDB    | Endo   | 1.010050167        | 1           | Fatty Amides                             | 0      | 0      | 150314-34-4                                                   |
| 15818   | Dihydroandrosterone                  | HMDB    | Endo   | 0.000474998        | 1           | Steroids and Steroid Derivatives         | 0      | 0      | 1852-53-5                                                     |
| 5460203 | Dihydrobiopterin                     | HMDB    | Endo   | 0.005999975        | 1           | Pteridines and Derivatives               | 2      | 5      | 6779-87-9                                                     |
| 98792   | Dihydrofolic acid                    | HMDB    | Endo   | 0.005000087        | 1           | Pteridines and Derivatives               | 0      | 12     | 4033-27-6                                                     |
| 10635   | Dihydrotestosterone                  | HMDB    | Endo   | 0.001487884        | 2           | Steroids and Steroid Derivatives         | 19     | 11     | 521-18-6,12040-51-6,28801-96-9                                |
| 649     | Dihydrouracil                        | HMDB    | Endo   | 0.314963034        | 2           | Diazines                                 | 0      | 16     | 504-07-4                                                      |
| 668     | Dihydroxyacetone phosphate           | HMDB    | Endo   | 15.60045374        | 1           | Organic Phosphoric Acids and Derivatives | 0      | 34     | 57-04-5,2134-85-2                                             |
| 6213    | Dimethyl sulfone                     | HMDB    | Endo   | 8.800424861        | 1           | Sulfonyls                                | 0      | 1      | 67-71-0                                                       |
| 674     | Dimethylamine                        | HMDB    | Endo   | 4.566741816        | 3           | Alkylamines                              | 1      | 1      | 124-40-3                                                      |
| 673     | Dimethylglycine                      | HMDB    | Endo   | 2.222649605        | 2           | Amino Acids and Derivatives              | 1      | 5      | 1118-68-9,18319-88-5,780741-89-1                              |
| 123831  | Dimethyl-L-arginine                  | HMDB    | Endo   | 0.480609591        | 2           | Amino Acids and Derivatives              | 0      | 0      | 102783-24-4                                                   |
| 61503   | D-Lactic acid                        | HMDB    | Endo   | 11.000052          | 1           | Hydroxy Acids and Derivatives            | 0      | 1      | 10326-41-7                                                    |
| 10010   | DL-Homocystine                       | HMDB    | Endo   | 9.800172622        | 1           | Amino Acids and Derivatives              | 36     | 1      | 870-93-9,462-10-2,626-72-2                                    |
| 440917  | D-Limonene                           | HMDB    | Food   | 0.190005929        | 1           | Prenol Lipids                            | 0      | 1      | 5989-27-5                                                     |
| 18950   | D-Mannose                            | HMDB    | Endo   | 49.95886666        | 2           | Monosaccharides                          | 0      | 25     | 31103-86-3,530-26-7,50986-23-7,50986-24-8,147-74-0,40866-07-7 |
| 445580  | Docosahexaenoic acid                 | NHANES  | Food   | 124.9982828        | 1           | Fatty Acids and Conjugates               | 79     | 14     | 6217-54-5,1024594-51-1,25377-50-8                             |
| 5497182 | Docosapentaenoic acid                | NHANES  | Food   | 41.59999304        | 1           | Fatty Acids and Conjugates               | 0      | 10     | 24880-45-3                                                    |
| 6441454 | Docosapentaenoic-6 acid (22:5n-6)    | NHANES  | Food   | 19.59942051        | 1           | Fatty Acids and Conjugates               | 0      | 4      | 25182-74-5                                                    |
| 5312557 | Docosatrenoic acid                   | HMDB    | Endo   | 0.003999844        | 1           | Fatty Acids and Conjugates               | 0      | 0      | 28845-86-5                                                    |
| 5283028 | Dodecanedioic acid                   | HMDB    | Endo   | 219.7081336        | 1           | Carboxylic Acids and Derivatives         | 0      | 1      | 6402-36-4                                                     |
| 102182  | Dodecanoic acid                      | HMDB    | Food   | 3.277562481        | 4           | Fatty Acids and Conjugates               | 0      | 1      | 1908-11-8                                                     |
| 168381  | Dodecanoylcarnitine                  | HMDB    | Food   | 0.07211451         | 2           | Fatty Acid Esters                        | 0      | 0      | 25518-54-1                                                    |
| 6433320 | Dolichol-20                          | HMDB    | Endo   | 0.03099901         | 1           | Prenol Lipids                            | 0      | 0      | 2067-66-5                                                     |
| 681     | Dopamine                             | HMDB    | Endo   | 22.49965555        | 1           | Phenols and Derivatives                  | 0      | 54     | 51-61-6,50444-17-2                                            |
| 122136  | Dopamine 3-O-sulfate                 | HMDB    | Endo   | 0.026500279        | 1           | Phenols and Derivatives                  | 0      | 4      | 51317-41-0                                                    |
| 123932  | Dopamine 4-sulfate                   | HMDB    | Endo   | 0.002700009        | 1           | Phenols and Derivatives                  | 0      | 0      | 38339-02-5                                                    |
| 71082   | D-Ornithine                          | HMDB    | Endo   | 88.99676315        | 1           | Amino Acids and Derivatives              | 3      | 2      | 348-66-3                                                      |

| PC_CID   | Chemical                    | Dataset | Source | Concentration (µM) | No. studies | Class                            | PubMed | Biosys | CAS                                      |
|----------|-----------------------------|---------|--------|--------------------|-------------|----------------------------------|--------|--------|------------------------------------------|
| 736316   | D-Pipecolic acid            | HMDB    | Endo   | 0.10999724         | 1           | Amino Acids and Derivatives      | 0      | 0      | 1723-00-8                                |
| 5779     | D-Ribose                    | HMDB    | Endo   | 2.299979017        | 1           | Monosaccharides                  | 0      | 3      | 50-69-1                                  |
| 77982    | D-Ribose 5-phosphate        | HMDB    | Endo   | 13.19977785        | 1           | Monosaccharides                  | 0      | 9      | 3615-55-2                                |
| 439184   | D-Ribulose 5-phosphate      | HMDB    | Endo   | 1.579960742        | 1           | Monosaccharides                  | 0      | 13     | 4151-19-3                                |
| 165007   | D-Sedoheptulose 7-phosphate | HMDB    | Endo   | 0.890030097        | 1           | Disaccharides                    | 0      | 11     | 2646-35-7                                |
| 71077    | D-Serine                    | HMDB    | Endo   | 2.865090678        | 2           | Amino Acids and Derivatives      | 0      | 5      | 312-84-5                                 |
| 145729   | dUDP                        | HMDB    | Endo   | 0.500023591        | 1           | Pyrimidine Nucleotides           | 0      | 5      | 4208-67-7                                |
| 6912     | D-Xylitol                   | HMDB    | Food   | 0.676989172        | 1           | Sugar Alcohols                   | 0      | 5      | 488-81-3                                 |
| 644160   | D-Xylose                    | HMDB    | Endo   | 2356.187204        | 2           | Monosaccharides                  | 0      | 18     | 25990-60-7                               |
| 443844   | Ecgonine methyl ester       | HMDB    | Drug   | 0.236998848        | 1           | Piperidines                      | 0      | 1      | 7143-09-1                                |
| 6439848  | Eicosadienoic acid          | NHANES  | Endo   | 21.19997495        | 1           | Fatty Acids and Conjugates       | 0      | 1      | 2091-39-6                                |
| 446284   | Eicosapentaenoic acid       | HMDB    | Food   | 10.44997933        | 8           | Fatty Acids and Conjugates       | 83     | 27     | 10417-94-4,25377-48-4,1553-41-9          |
| 5282768  | Eicosenoic acid             | NHANES  | Food   | 13.60041082        | 1           | Fatty Acids and Conjugates       | 0      | 1      | 26764-41-0                               |
| 637517   | Elaidic acid                | HMDB    | Food   | 100.0029814        | 1           | Fatty Acids and Conjugates       | 2      | 9      | 112-79-8,2027-47-6,1120-45-2,861204-23-1 |
| 5281855  | Ellagic acid                | HMDB    | Food   | 0.066997498        | 1           | Benzopyrans                      | 0      | 0      | 476-66-4                                 |
| 461776   | Enkephalin L                | HMDB    | Endo   | 0.000300008        | 1           | Peptides                         | 0      | 0      | 14-18-6                                  |
| 11055399 | Epiandrosterone             | HMDB    | Endo   | 2.899968863        | 1           | Steroids and Steroid Derivatives | 0      | 0      | 481-29-8                                 |
| 182232   | Epicatechin                 | HMDB    | Food   | 0.625002268        | 1           | Flavonoids                       | 0      | 0      | 35323-91-2                               |
| 247732   | Epietiocholanolone          | HMDB    | Drug   | 1.7E-05            | 1           | Steroids and Steroid Derivatives | 0      | 0      | 571-31-3                                 |
| 5816     | Epinephrine                 | HMDB    | Endo   | 0.000566123        | 4           | Phenols and Derivatives          | 95     | 40     | 51-43-4,51028-73-0                       |
| 3035453  | Epinephrine sulfate         | HMDB    | Endo   | 0.005699938        | 1           | Phenols and Derivatives          | 0      | 0      | 77469-50-2                               |
| 228491   | Epipregnanolone             | HMDB    | Endo   | 0.001009904        | 2           | Steroids and Steroid Derivatives | 0      | 0      | 128-21-2                                 |
| 91469    | Equol                       | HMDB    | Food   | 0.000599989        | 1           | Flavonoids                       | 10     | 0      | 531-95-3                                 |
| 5280793  | Ergocalciferol              | HMDB    | Food   | 0.002738623        | 2           | Steroids and Steroid Derivatives | 0      | 2      | 50-14-6                                  |
| 444679   | Ergosterol                  | HMDB    | Food   | 0.009326458        | 1           | Steroids and Steroid Derivatives | 0      | 2      | 57-87-4                                  |
| 5281116  | Erucic acid                 | NHANES  | Food   | 3.44009814         | 1           | Fatty Acids and Conjugates       | 0      | 1      | 112-86-7                                 |
| 222285   | Erythritol                  | HMDB    | Food   | 4.100053408        | 1           | Sugar Alcohols                   | 0      | 1      | 149-32-6                                 |
| 2781043  | Erythronic acid             | HMDB    | Endo   | 1.999905641        | 1           | Monosaccharides                  | 0      | 0      | 13752-84-6                               |
| 5757     | Estradiol                   | HMDB    | Endo   | 0.000116188        | 2           | Steroids and Steroid Derivatives | 373    | 21     | 50-28-2,73459-61-7,873662-39-6           |

| PC_CID   | Chemical                  | Dataset | Source | Concentration ( $\mu\text{M}$ ) | No. studies | Class                                  | PubMed | Biosys | CAS                                                                      |
|----------|---------------------------|---------|--------|---------------------------------|-------------|----------------------------------------|--------|--------|--------------------------------------------------------------------------|
| 5756     | Estriol                   | HMDB    | Endo   | 0.005999975                     | 1           | Steroids and Steroid Derivatives       | 13     | 2      | 50-27-1                                                                  |
| 160638   | Estriol-3-glucuronide     | HMDB    | Endo   | 0.013999971                     | 1           | Steroids and Steroid Derivatives       | 0      | 0      | 2479-91-6                                                                |
| 5870     | Estrone                   | HMDB    | Endo   | 0.000159798                     | 3           | Steroids and Steroid Derivatives       | 69     | 18     | 53-16-7,37242-41-4                                                       |
| 3001028  | Estrone sulfate           | HMDB    | Endo   | 0.001798684                     | 6           | Steroids and Steroid Derivatives       | 10     | 13     | 481-97-0,438-67-5                                                        |
| 702      | Ethanol                   | HMDB    | Food   | 24.49575899                     | 2           | Alcohols and Polyols                   | 95     | 13     | 64-17-5,121182-78-3,68475-56-9,71076-86-3,71329-38-9,8000-16-6,8024-45-1 |
| 700      | Ethanolamine              | HMDB    | Endo   | 1.599994193                     | 1           | Alkylamines                            | 0      | 12     | 141-43-5                                                                 |
| 7500     | Ethyl benzene             | NHANES  | Pollut | 0.000335563                     | 3           | Aromatic Homomonocyclic Compounds      | 0      | 1      | 100-41-4                                                                 |
| 18392195 | Ethyl glucuronide         | HMDB    | Food   | 2.899968863                     | 1           | Sugar Acids and Derivatives            | 0      | 0      | 17685-04-0                                                               |
| 134494   | Etiocholenediol           | HMDB    | Drug   | 6.70012E-05                     | 1           | Steroids and Steroid Derivatives       | 0      | 0      | 1851-23-6                                                                |
| 5880     | Etiocholanolone           | HMDB    | Endo   | 0.001249015                     | 2           | Steroids and Steroid Derivatives       | 1      | 1      | 53-42-9                                                                  |
| 3314     | Eugenol                   | HMDB    | Food   | 6.49998585                      | 1           | Phenols and Derivatives                | 0      | 0      | 97-53-0                                                                  |
| 643975   | FAD                       | HMDB    | Endo   | 0.067637007                     | 2           | Flavin Nucleotides                     | 0      | 93     | 146-14-5,16426-55-4,887565-61-9                                          |
| 3325     | Famotidine                | HMDB    | Drug   | 4.000022556                     | 1           | Organic Sulfuric Acids and Derivatives | 2      | 2      | 76824-35-6                                                               |
| 445070   | Farnesol                  | HMDB    | Endo   | 0.24999859                      | 1           | Prenol Lipids                          | 1      | 1      | 4602-84-0,106-28-5                                                       |
| 445713   | Farnesyl pyrophosphate    | HMDB    | Endo   | 0.00859994                      | 1           | Prenol Lipids                          | 0      | 9      | 13058-04-3                                                               |
| 643976   | Flavin Mononucleotide     | HMDB    | Endo   | 0.007937158                     | 2           | Pteridines and Derivatives             | 1      | 35     | 146-17-8                                                                 |
| 6037     | Folic acid                | NHANES  | Food   | 0.02786455                      | 1           | Pteridines and Derivatives             | 595    | 13     | 59-30-3,33609-88-0,47707-78-8                                            |
| 284      | Formic acid               | HMDB    | Endo   | 98.83976465                     | 4           | Carboxylic Acids and Derivatives       | 0      | 70     | 64-18-6,82069-14-5,15907-03-6,8006-93-7                                  |
| 20484    | Fructosamine              | HMDB    | Endo   | 1427.528634                     | 4           | Monosaccharides                        | 44     | 2      | 4429-04-3                                                                |
| 10267    | Fructose 1,6-bisphosphate | HMDB    | Endo   | 1.199974132                     | 1           | Monosaccharides                        | 0      | 8      | 488-69-7                                                                 |
| 69507    | Fructose 6-phosphate      | HMDB    | Endo   | 10.20012525                     | 1           | Monosaccharides                        | 0      | 25     | 6814-87-5                                                                |
| 444972   | Fumaric acid              | HMDB    | Endo   | 1.500052339                     | 1           | Fatty Acids and Conjugates             | 0      | 20     | 110-17-8,623158-97-4,6915-18-0                                           |
| 3446     | Gabapentin                | HMDB    | Drug   | 0.309994724                     | 1           | Amino Acids and Derivatives            | 0      | 0      | 60142-96-3                                                               |
| 11850    | Galactitol                | HMDB    | Food   | 0.543296537                     | 2           | Fatty Alcohols                         | 0      | 2      | 608-66-2,18089-21-9,362631-40-1,40742-76-5                               |
| 123986   | Galactosylhydroxylysine   | HMDB    | Endo   | 0.060998866                     | 1           | Glycosyl Compounds                     | 0      | 0      | 32448-36-5                                                               |



| PC_CID   | Chemical                          | Dataset | Source | Concentration (µM) | No. studies | Class                            | PubMed | Biosys | CAS                                                                                                                              |
|----------|-----------------------------------|---------|--------|--------------------|-------------|----------------------------------|--------|--------|----------------------------------------------------------------------------------------------------------------------------------|
| 370      | Gallic acid                       | HMDB    | Food   | 0.008773671        | 8           | Benzoic Acid and Derivatives     | 0      | 0      | 149-91-7                                                                                                                         |
| 119      | Gamma-Aminobutyric acid           | HMDB    | Endo   | 0.10999724         | 1           | Amino Acids and Derivatives      | 2      | 49     | 56-12-2,3131-86-0                                                                                                                |
| 7302     | Gamma-Butyrolactone               | HMDB    | Endo   | 0.279990389        | 1           | Lactones                         | 28     | 0      | 96-48-0,187997-16-6                                                                                                              |
| 15887183 | Gamma-CEHC                        | HMDB    | Food   | 0.159997034        | 1           | Benzopyrans                      | 0      | 0      | 178167-77-6                                                                                                                      |
| 123938   | Gamma-Glutamylcysteine            | HMDB    | Endo   | 6.892266597        | 2           | Amino Acids and Derivatives      | 1      | 11     | 636-58-8                                                                                                                         |
| 5280933  | Gamma-Linolenic acid              | NHANES  | Food   | 46.89917103        | 1           | Lineolic Acids and Derivatives   | 2      | 12     | 506-26-3                                                                                                                         |
| 92729    | Gamma-Tocopherol                  | NHANES  | Food   | 4.364920604        | 1           | Prenol Lipids                    | 0      | 2      | 54-28-4                                                                                                                          |
| 20057285 | Ganglioside GM3 (d18:1/16:0)      | HMDB    | Endo   | 4.500101716        | 1           | Sphingolipids                    | 0      | 0      | 54827-14-4                                                                                                                       |
| 20057290 | Ganglioside GM3 (d18:1/26:1(17Z)) | HMDB    | Endo   | 0.566997718        | 1           | Sphingolipids                    | 0      | 0      | 54827-14-4                                                                                                                       |
| 5280961  | Genistein                         | HMDB    | Food   | 0.003873875        | 4           | Flavonoids                       | 14     | 0      | 446-72-0,690224-00-1                                                                                                             |
| 3469     | Gentisic acid                     | HMDB    | Endo   | 0.806218888        | 2           | Benzoic Acid and Derivatives     | 0      | 2      | 490-79-9                                                                                                                         |
| 27812    | Gestrinone                        | HMDB    | Drug   | 0.24999859         | 1           | Steroids and Steroid Derivatives | 0      | 0      | 16320-04-0,40542-65-2                                                                                                            |
| 439213   | Glucosamine                       | HMDB    | Drug   | 0.289992563        | 1           | Monosaccharides                  | 0      | 1      | 3416-24-8                                                                                                                        |
| 5958     | Glucose 6-phosphate               | HMDB    | Endo   | 29.09888915        | 1           | Monosaccharides                  | 0      | 11     | 56-73-5                                                                                                                          |
| 6475228  | Glucosylceramide                  | HMDB    | Endo   | 6.00024319         | 1           | Sphingolipids                    | 0      | 1      | 85305-87-9                                                                                                                       |
| 20057354 | Glucosylceramide (d18:1/12:0)     | HMDB    | Endo   | 3.599878158        | 1           | Sphingolipids                    | 0      | 0      | 85305-87-9                                                                                                                       |
| 53481620 | Glutaconylcarnitine               | HMDB    | Endo   | 0.02000046         | 1           | Fatty Acid Esters                | 0      | 0      | .                                                                                                                                |
| 743      | Glutaric acid                     | HMDB    | Endo   | 0.800034842        | 1           | Carboxylic Acids and Derivatives | 0      | 2      | 110-94-1                                                                                                                         |
| 124886   | Glutathione                       | HMDB    | Endo   | 21.77146135        | 2           | Peptides                         | 60     | 39     | 70-18-8                                                                                                                          |
| 751      | Glyceraldehyde                    | HMDB    | Endo   | 1476.013276        | 1           | Alcohols and Polyols             | 0      | 1      | 56-82-6                                                                                                                          |
| 439194   | Glyceric acid                     | HMDB    | Endo   | 10.00014907        | 1           | Sugar Acids and Derivatives      | 0      | 6      | 473-81-4                                                                                                                         |
| 753      | Glycerol                          | HMDB    | Endo   | 71.87295166        | 5           | Sugar Alcohols                   | 9      | 34     | 56-81-5,25618-55-7,175385-78-1,280575-69-1,29796-42-7,30049-52-6,37228-54-9,64333-26-2,75398-78-6,78630-16-7,8013-25-0,8043-29-6 |
| 439162   | Glycerol 3-phosphate              | HMDB    | Endo   | 30.00007855        | 1           | Monosaccharides                  | 0      | 17     | 17989-41-2                                                                                                                       |
| 439285   | Glycerophosphocholine             | HMDB    | Endo   | 32.99975047        | 1           | Glycerophospholipids             | 0      | 8      | 28319-77-9,103709-68-8,117829-79-5                                                                                               |
| 5257127  | Glycine                           | HMDB    | Endo   | 262.5390939        | 6           | Amino Acids and Derivatives      | 30     | 25     | 56-40-6                                                                                                                          |
| 5317750  | Glycitein                         | HMDB    | Food   | 0.000474333        | 2           | Flavonoids                       | 0      | 0      | 40957-83-3                                                                                                                       |
| 10140    | Glycocholic acid                  | HMDB    | Endo   | 0.060000643        | 1           | Steroids and Steroid Derivatives | 0      | 16     | 475-31-0                                                                                                                         |

| PC_CID   | Chemical                         | Dataset | Source | Concentration (µM) | No. studies | Class                                  | PubMed | Biosys | CAS                                                                         |
|----------|----------------------------------|---------|--------|--------------------|-------------|----------------------------------------|--------|--------|-----------------------------------------------------------------------------|
| 439177   | Glycogen                         | HMDB    | Endo   | 41.14490071        | 2           | Tetrasaccharides                       | 0      | 1      | 9005-79-2                                                                   |
| 757      | Glycolic acid                    | HMDB    | Endo   | 7.849893776        | 2           | Hydroxy Acids and Derivatives          | 0      | 6      | 79-14-1                                                                     |
| 12310288 | Glycoursodeoxycholic acid        | HMDB    | Endo   | 0.190005929        | 1           | Steroids and Steroid Derivatives       | 0      | 0      | 64480-66-6                                                                  |
| 10114    | Glycyrrhetic acid                | HMDB    | Food   | 0.103996296        | 1           | Prenol Lipids                          | 1      | 0      | 471-53-4,1449-05-4,107420-91-7,15301-63-0,202522-39-2,299198-00-8,8055-71-8 |
| 760      | Glyoxylic acid                   | HMDB    | Endo   | 3.049873151        | 1           | Carboxylic Acids and Derivatives       | 0      | 10     | 298-12-4                                                                    |
| 23985    | Gold                             | HMDB    | Pollut | 0.000239993        | 1           | Homogeneous Transition Metal Compounds | 6      | 0      | 7440-57-5                                                                   |
| 460      | Guaiacol                         | HMDB    | Endo   | 8.500287615        | 1           | Phenols and Derivatives                | 0      | 0      | 90-05-1                                                                     |
| 3520     | Guanidine                        | HMDB    | Endo   | 0.17662967         | 2           | Guanidines                             | 0      | 5      | 50-01-1                                                                     |
| 439918   | Guanidinosuccinic acid           | HMDB    | Endo   | 0.293875227        | 4           | Amino Acids and Derivatives            | 0      | 0      | 6133-30-8                                                                   |
| 763      | Guanidoacetic acid               | HMDB    | Endo   | 4.343584809        | 6           | Amino Acids and Derivatives            | 2      | 8      | 352-97-6                                                                    |
| 6802     | Guanosine                        | HMDB    | Endo   | 0.800034842        | 1           | Purine Nucleosides and Analogues       | 3      | 15     | 118-00-3,484-80-0,685891-87-6                                               |
| 8977     | Guanosine diphosphate            | HMDB    | Endo   | 16.43149631        | 2           | Purine Nucleotides                     | 0      | 224    | 146-91-8                                                                    |
| 6804     | Guanosine monophosphate          | HMDB    | Endo   | 0.009698345        | 2           | Purine Nucleotides                     | 0      | 48     | 85-32-5,25191-14-4,29593-02-0,573-48-8,642-41-1                             |
| 6830     | Guanosine triphosphate           | HMDB    | Endo   | 56.00270538        | 1           | Purine Nucleotides                     | 0      | 305    | 86-01-1,56001-37-7                                                          |
| 53477714 | Heparan sulfate                  | HMDB    | Endo   | 0.500023591        | 1           | Disaccharides                          | 9      | 0      | 9050-30-0                                                                   |
| 5283211  | Hepoxilin A3                     | HMDB    | Endo   | 0.113995079        | 1           | Eicosanoids                            | 0      | 5      | 85589-24-8                                                                  |
| 10465    | Heptadecanoic acid               | HMDB    | Food   | 1.505913966        | 2           | Fatty Acids and Conjugates             | 2      | 0      | 506-12-7                                                                    |
| 53477856 | Heptaglutamyl folic acid         | HMDB    | Endo   | 0.007600053        | 1           | Pteridines and Derivatives             | 0      | 0      | .                                                                           |
| 72281    | Hesperetin                       | HMDB    | Food   | 0.418323593        | 2           | Flavonoids                             | 0      | 0      | 520-33-2                                                                    |
| 8370     | Hexachlorobenzene                | NHANES  | Pollut | 0.000296371        | 1           | Organo-chlorine Pesticides             | 12     | 0      | 118-74-1                                                                    |
| 10469    | Hexacosanoic acid                | HMDB    | Endo   | 0.302159577        | 2           | Fatty Acids and Conjugates             | 2      | 0      | 506-46-7                                                                    |
| 464      | Hippuric acid                    | HMDB    | Food   | 2.999963134        | 1           | Amino Acids and Derivatives            | 0      | 9      | 495-69-2,66407-11-2,140480-84-8,21251-67-2,892119-18-5,892119-19-6          |
| 774      | Histamine                        | HMDB    | Endo   | 0.000670022        | 1           | Azoles                                 | 12     | 31     | 51-45-6,65592-96-3                                                          |
| 65137    | Histidylproline diketopiperazine | HMDB    | Endo   | 2.19993E-05        | 1           | Piperazines                            | 0      | 0      | 53109-32-3                                                                  |
| 778      | Homocysteine                     | NHANES  | Endo   | 8.210386507        | 1           | Amino Acids and Derivatives            | 1469   | 19     | 454-29-5,454-28-4,6681-97-6                                                 |

| PC_CID   | Chemical                 | Dataset | Source | Concentration (µM) | No. studies | Class                                  | PubMed | Biosys | CAS                                                                                                                                                                                              |
|----------|--------------------------|---------|--------|--------------------|-------------|----------------------------------------|--------|--------|--------------------------------------------------------------------------------------------------------------------------------------------------------------------------------------------------|
| 107712   | Homocysteine thiolactone | HMDB    | Endo   | 0.002820052        | 1           | Thiolanes                              | 3      | 0      | 14007-10-4,10593-85-8                                                                                                                                                                            |
| 780      | Homogentisic acid        | HMDB    | Endo   | 0.042998072        | 1           | Phenylacetic Acid Derivatives          | 0      | 4      | 451-13-8                                                                                                                                                                                         |
| 9085     | Homo-L-arginine          | HMDB    | Endo   | 2.37762003         | 3           | Amino Acids and Derivatives            | 5      | 0      | 156-86-5,13094-78-5                                                                                                                                                                              |
| 1738     | Homovanillic acid        | HMDB    | Endo   | 0.049011515        | 9           | Phenols and Derivatives                | 1      | 3      | 306-08-1                                                                                                                                                                                         |
| 7139     | Homoveratric acid        | HMDB    | Endo   | 0.815217769        | 8           | Phenols and Derivatives                | 0      | 0      | 93-40-3                                                                                                                                                                                          |
| 37270    | HpCDD                    | NHANES  | Pollut | 4.93669E-07        | 2           | Chlorinated-p-dibenzo Dioxins          | 0      | 0      | 35822-46-9                                                                                                                                                                                       |
| 38199    | HpCDF                    | NHANES  | Pollut | 1.55115E-07        | 2           | Chlorinated-p-dibenzo Dioxins          | 0      | 0      | 67562-39-4                                                                                                                                                                                       |
| 29575    | HxCDD                    | NHANES  | Pollut | 4.17117E-07        | 2           | Chlorinated-p-dibenzo Dioxins          | 0      | 0      | 19408-74-3                                                                                                                                                                                       |
| 24759    | Hyaluronan               | HMDB    | Endo   | 0.052998058        | 1           | Tetrasaccharides                       | 0      | 3      | 29382-75-0,165324-65-2,37243-73-5,9039-38-7                                                                                                                                                      |
| 3639     | Hydrochlorothiazide      | HMDB    | Drug   | 0.299991841        | 1           | Benzothiadiazines                      | 81     | 1      | 58-93-5,125727-50-6,8049-49-8                                                                                                                                                                    |
| 107      | Hydrocinnamic acid       | HMDB    | Food   | 1.298876942        | 8           | Aromatic Homomonocyclic Compounds      | 0      | 1      | 501-52-0                                                                                                                                                                                         |
| 769      | Hydrogen carbonate       | HMDB    | Endo   | 24219.17612        | 3           | Organic Carbonic Acids and Derivatives | 0      | 42     | 71-52-3                                                                                                                                                                                          |
| 784      | Hydrogen peroxide        | HMDB    | Endo   | 10.5002598         | 1           | Non-metal Oxoanionic Compounds         | 13     | 100    | 7722-84-1,218625-72-0,37355-84-3,66554-50-5,8007-30-5                                                                                                                                            |
| 402      | Hydrogen sulfide         | HMDB    | Endo   | 0.333170803        | 2           | Other Non-metal Organides              | 3      | 18     | 7704-34-9,7783-06-4,9035-99-8,15117-53-0,11144-15-3,12673-82-4,12684-31-0,12767-24-7,37331-50-3,56449-52-6,56591-09-4,56645-30-8,57035-13-9,63705-05-5,7782-45-8,8050-82-6,81032-32-8,97124-07-7 |
| 53481617 | Hydroxybutyrylcarnitine  | HMDB    | Endo   | 0.10999724         | 1           | Fatty Acid Esters                      | 0      | 0      | .                                                                                                                                                                                                |
| 414      | Hydroxycotinine          | HMDB    | Pollut | 0.295791637        | 2           | Alkaloids and Derivatives              | 0      | 1      | 27323-64-4                                                                                                                                                                                       |
| 89       | Hydroxykynurenine        | HMDB    | Endo   | 0.050001614        | 1           | Amino Acids and Derivatives            | 1      | 2      | 2147-61-7,484-78-6,606-14-4                                                                                                                                                                      |
| 9378     | Hydroxyphenyllactic acid | HMDB    | Endo   | 0.639991746        | 1           | Benzyl Alcohols and Derivatives        | 0      | 2      | 306-23-0                                                                                                                                                                                         |
| 69248    | Hydroxyproline           | HMDB    | Endo   | 14.88419631        | 4           | Amino Acids and Derivatives            | 2      | 9      | 30724-02-8                                                                                                                                                                                       |
| 68152    | Hydroxypropionic acid    | HMDB    | Endo   | 2.299979017        | 1           | Hydroxy Acids and Derivatives          | 0      | 6      | 503-66-2                                                                                                                                                                                         |
| 82755    | Hydroxytyrosol           | HMDB    | Food   | 0.159997034        | 1           | Phenols and Derivatives                | 2      | 0      | 10597-60-1                                                                                                                                                                                       |

| PC_CID  | Chemical             | Dataset | Source | Concentration (µM) | No. studies | Class                            | PubMed | Biosys | CAS                                                                                                                                                                |
|---------|----------------------|---------|--------|--------------------|-------------|----------------------------------|--------|--------|--------------------------------------------------------------------------------------------------------------------------------------------------------------------|
| 790     | Hypoxanthine         | HMDB    | Endo   | 3.452850079        | 8           | Imidazopyrimidines               | 2      | 25     | 68-94-0,146469-94-5,146469-95-6,51953-23-2,184856-40-4,184856-41-5,25991-07-5,25991-08-6,25991-09-7,39464-15-8,39464-17-0,480-99-9,51953-04-9,6535-89-3,95121-06-5 |
| 3672    | Ibuprofen            | HMDB    | Drug   | 241.9908704        | 1           | Prenol Lipids                    | 10     | 0      | 15687-27-1,58560-75-1,139466-08-3                                                                                                                                  |
| 96215   | Imidazoleacetic acid | HMDB    | Endo   | 0.099998509        | 1           | Azoles                           | 0      | 1      | 645-65-8                                                                                                                                                           |
| 504     | Imidazolone          | HMDB    | Endo   | 0.039999033        | 1           | Imidazolines                     | 0      | 1      | 1968-28-1                                                                                                                                                          |
| 802     | Indoleacetic acid    | HMDB    | Food   | 0.050001614        | 1           | Indoles                          | 1      | 2      | 87-51-4,6505-45-9,54692-39-6                                                                                                                                       |
| 92904   | Indolelactic acid    | HMDB    | Endo   | 2.799945632        | 1           | Indoles                          | 0      | 1      | 1821-52-9                                                                                                                                                          |
| 10258   | Indoxyl sulfate      | HMDB    | Food   | 14.0005974         | 1           | Indoles                          | 2      | 0      | 487-94-5,130385-38-5                                                                                                                                               |
| 6021    | Inosine              | HMDB    | Endo   | 0.349972745        | 4           | Purine Nucleosides and Analogues | 1      | 17     | 58-63-9,12712-98-0,132953-54-9,28861-88-3,292853-81-7,4181-51-5,691344-25-9,740029-83-8                                                                            |
| 8582    | Inosinic acid        | HMDB    | Endo   | 62.99781228        | 1           | Purine Nucleotides               | 1      | 16     | 131-99-7,30918-54-8,138240-72-9,25249-22-3,485-83-6,736074-82-1,801187-33-7                                                                                        |
| 439744  | Iodotyrosine         | HMDB    | Endo   | 0.000690013        | 1           | Amino Acids and Derivatives      | 0      | 8      | 70-78-0                                                                                                                                                            |
| 6590    | Isobutyric acid      | HMDB    | Endo   | 2.299979017        | 1           | Carboxylic Acids and Derivatives | 0      | 1      | 79-31-2                                                                                                                                                            |
| 1198    | Isocitric acid       | HMDB    | Endo   | 6.00024319         | 1           | Carboxylic Acids and Derivatives | 0      | 9      | 320-77-4                                                                                                                                                           |
| 736186  | Isoferulic acid      | HMDB    | Food   | 0.173253403        | 8           | Cinnamic Acid Derivatives        | 0      | 0      | 537-73-5                                                                                                                                                           |
| 3776    | Isopropyl alcohol    | HMDB    | Endo   | 83.29595595        | 1           | Alcohols and Polyols             | 0      | 2      | 67-63-0,555-31-7,21388-65-8,5131-95-3                                                                                                                              |
| 5281654 | Isorhamnetin         | HMDB    | Food   | 0.042998072        | 1           | Flavonoids                       | 0      | 0      | 480-19-3                                                                                                                                                           |
| 11552   | Iso-Valeraldehyde    | HMDB    | Food   | 0.10999724         | 1           | Carbonyl Compounds               | 0      | 0      | 590-86-3                                                                                                                                                           |
| 1001    | Isovaleric acid      | HMDB    | Food   | 1.599994193        | 1           | Fatty Acids and Conjugates       | 0      | 13     | 64-04-0                                                                                                                                                            |
| 6426851 | Isovalerylcarnitine  | HMDB    | Food   | 0.13800022         | 1           | Fatty Acid Esters                | 0      | 0      | 31023-24-2                                                                                                                                                         |
| 5280863 | Kaempferol           | HMDB    | Food   | 0.009999702        | 1           | Flavonoids                       | 1      | 1      | 520-18-3                                                                                                                                                           |

| PC_CID   | Chemical                      | Dataset | Source | Concentration (µM) | No. studies | Class                            | PubMed | Biosys | CAS                                                                                                                                                          |
|----------|-------------------------------|---------|--------|--------------------|-------------|----------------------------------|--------|--------|--------------------------------------------------------------------------------------------------------------------------------------------------------------|
| 446715   | Keratan                       | HMDB    | Endo   | 0.1400018          | 1           | Tetrasaccharides                 | 0      | 0      | 69992-87-6                                                                                                                                                   |
| 70       | Ketoleucine                   | HMDB    | Endo   | 30.62755212        | 2           | Fatty Acids and Conjugates       | 0      | 6      | 816-66-0                                                                                                                                                     |
| 3845     | Kynurenic acid                | HMDB    | Endo   | 0.022999104        | 1           | Amino Acids and Derivatives      | 2      | 5      | 492-27-3,13593-94-7                                                                                                                                          |
| 89594    | L(-)-Nicotine pestanal        | HMDB    | Pollut | 0.366264327        | 3           | Alkaloids and Derivatives        | 30     | 7      | 54-11-5,16760-37-5,13890-81-8,13890-82-9,551-13-3                                                                                                            |
| 439939   | L-2-Hydroxyglutaric acid      | HMDB    | Endo   | 1.500052339        | 1           | Hydroxy Acids and Derivatives    | 0      | 4      | 13095-48-2                                                                                                                                                   |
| 18230    | L-Acetylcarnitine             | HMDB    | Endo   | 5.785761584        | 3           | Fatty Acid Esters                | 0      | 1      | 4398-79-2                                                                                                                                                    |
| 20057304 | Lactosylceramide (d18:1/12:0) | HMDB    | Endo   | 4.500101716        | 1           | Sphingolipids                    | 1      | 0      | 4682-48-8                                                                                                                                                    |
| 11333    | Lactulose                     | HMDB    | Drug   | 0.119995624        | 1           | Disaccharides                    | 1      | 0      | 4618-18-2,58166-24-8,29319-45-7,33980-82-4,40773-84-0,576-08-9                                                                                               |
| 5950     | L-Alanine                     | HMDB    | Endo   | 436.592384         | 3           | Amino Acids and Derivatives      | 38     | 53     | 56-41-7,115967-49-2,170805-71-7,18875-37-1,25191-17-7,6898-94-8,759445-89-1,787635-21-6,130380-93-7                                                          |
| 99288    | L-Alloisoleucine              | HMDB    | Endo   | 1.900087618        | 1           | Amino Acids and Derivatives      | 0      | 0      | 1509-34-8                                                                                                                                                    |
| 80283    | L-Alpha-aminobutyric acid     | HMDB    | Endo   | 22.94270452        | 3           | Amino Acids and Derivatives      | 0      | 0      | 1492-24-6                                                                                                                                                    |
| 439195   | L-Arabinose                   | HMDB    | Endo   | 2.50002317         | 1           | Monosaccharides                  | 0      | 5      | 5328-37-0                                                                                                                                                    |
| 439255   | L-Arabitol                    | HMDB    | Endo   | 1.999905641        | 1           | Sugar Alcohols                   | 0      | 2      | 7643-75-6                                                                                                                                                    |
| 6322     | L-Arginine                    | HMDB    | Food   | 102.0537872        | 9           | Amino Acids and Derivatives      | 286    | 65     | 74-79-3,1119-34-2,142-49-4,25212-18-4,4455-52-1,667422-95-9                                                                                                  |
| 6267     | L-Asparagine                  | HMDB    | Endo   | 45.57229655        | 6           | Amino Acids and Derivatives      | 7      | 36     | 70-47-3,5794-13-8,7006-34-0,32640-57-6,328-41-6                                                                                                              |
| 5960     | L-Aspartic acid               | HMDB    | Endo   | 20.62904429        | 3           | Amino Acids and Derivatives      | 16     | 72     | 56-84-8,25608-40-6,39162-75-9,6899-03-2,155436-59-2,155436-61-6,155436-63-8,155436-65-0,181119-33-5,181119-34-6,221628-95-1,26834-87-7,27881-03-4,90819-17-3 |
| 93078    | L-Aspartyl-L-phenylalanine    | HMDB    | Food   | 0.017999703        | 1           | Amino Acids and Derivatives      | 0      | 0      | 13433-09-5                                                                                                                                                   |
| 65728    | Lathosterol                   | HMDB    | Endo   | 9.89965591         | 1           | Steroids and Steroid Derivatives | 12     | 4      | 80-99-9                                                                                                                                                      |
| 10917    | L-Carnitine                   | HMDB    | Endo   | 38.6559226         | 4           | Alkylamines                      | 11     | 14     | 541-15-1,44985-71-9,7634-98-2                                                                                                                                |
| 439258   | L-Cystathionine               | HMDB    | Endo   | 0.203599592        | 2           | Amino Acids and Derivatives      | 3      | 13     | 56-88-2                                                                                                                                                      |

| PC_CID   | Chemical                     | Dataset | Source | Concentration (µM) | No. studies | Class                       | PubMed | Biosys | CAS                                                                                                                 |
|----------|------------------------------|---------|--------|--------------------|-------------|-----------------------------|--------|--------|---------------------------------------------------------------------------------------------------------------------|
| 5862     | L-Cysteine                   | HMDB    | Endo   | 71.74369671        | 3           | Amino Acids and Derivatives | 61     | 53     | 52-90-4,4371-52-2,62488-11-3                                                                                        |
| 22833544 | L-Cysteinylglycine disulfide | HMDB    | Endo   | 13.60041082        | 1           | Peptides                    | 0      | 0      | 70555-24-7                                                                                                          |
| 67678    | L-Cystine                    | HMDB    | Endo   | 96.45725916        | 4           | Amino Acids and Derivatives | 4      | 7      | 56-89-3,24645-67-8                                                                                                  |
| 6047     | L-Dopa                       | HMDB    | Endo   | 0.007230117        | 1           | Amino Acids and Derivatives | 0      | 17     | 59-92-7,587-45-1,23734-74-9,25525-15-9,34241-25-3,72572-99-7,72573-00-3,88250-23-1,90638-38-3                       |
| 5352425  | Lead                         | NHANES  | Pollut | 0.065618343        | 6           | Post-transition Metals      | 65     | 3      | 7439-92-1,54076-28-7,14701-27-0,15158-12-0,724427-66-1                                                              |
| 5280492  | Leukotriene B4               | HMDB    | Endo   | 0.001019646        | 3           | Eicosanoids                 | 8      | 25     | 71160-24-2                                                                                                          |
| 5283125  | Leukotriene B5               | HMDB    | Endo   | 0.002498162        | 2           | Eicosanoids                 | 0      | 0      | 80445-66-5                                                                                                          |
| 5280493  | Leukotriene C4               | HMDB    | Endo   | 0.000156493        | 3           | Eicosanoids                 | 0      | 23     | 72025-60-6,10-34-4                                                                                                  |
| 5280878  | Leukotriene D4               | HMDB    | Endo   | 4.20017E-05        | 1           | Eicosanoids                 | 1      | 19     | 73836-78-9                                                                                                          |
| 5280879  | Leukotriene E4               | HMDB    | Endo   | 3.54744E-05        | 3           | Eicosanoids                 | 1      | 18     | 75715-89-8                                                                                                          |
| 5280938  | Leukotriene F4               | HMDB    | Endo   | 0.000305           | 1           | Eicosanoids                 | 0      | 3      | .                                                                                                                   |
| 149096   | Levofloxacin                 | HMDB    | Drug   | 0.134997368        | 1           | Phenylpiperazines           | 6      | 1      | 100986-85-4                                                                                                         |
| 33032    | L-Glutamic acid              | HMDB    | Endo   | 56.00830593        | 6           | Amino Acids and Derivatives | 21     | 131    | 56-86-0,25513-46-6,10549-13-0,138-16-9,24938-00-9,26717-13-5,6899-05-4,84960-48-5                                   |
| 6992086  | L-Glutamine                  | HMDB    | Endo   | 547.5205526        | 6           | Amino Acids and Derivatives | 33     | 21     | 56-85-9                                                                                                             |
| 6326776  | L-Glyceric acid              | HMDB    | Endo   | 1.999905641        | 1           | Sugar Acids and Derivatives | 0      | 0      | 28305-26-2                                                                                                          |
| 3246938  | L-Hexanoylcarnitine          | HMDB    | Endo   | 0.080002292        | 1           | Fatty Acid Esters           | 0      | 0      | 22671-29-0                                                                                                          |
| 6274     | L-Histidine                  | HMDB    | Food   | 102.6063683        | 5           | Amino Acids and Derivatives | 6      | 35     | 71-00-1,7006-35-1,6027-02-7,150-35-6,155304-24-8,26062-48-6,35479-49-3,35558-59-9,45955-20-2,54166-13-1,736075-03-9 |
| 12647    | L-Homoserine                 | HMDB    | Endo   | 11.9999202         | 1           | Amino Acids and Derivatives | 0      | 6      | 672-15-1                                                                                                            |

| PC_CID   | Chemical                           | Dataset | Source | Concentration (µM) | No. studies | Class                                  | PubMed | Biosys | CAS                                                                                                                                                                                  |
|----------|------------------------------------|---------|--------|--------------------|-------------|----------------------------------------|--------|--------|--------------------------------------------------------------------------------------------------------------------------------------------------------------------------------------|
| 727      | Lindane                            | NHANES  | Pollut | 0.000208724        | 3           | Chlorinated Organo-chlorine Pesticides | 5      | 1      | 58-89-9,319-84-6,319-85-7,319-86-8,608-73-1,6108-10-7,20437-97-2,25897-48-7,39284-22-5,53529-37-6,55963-79-6,60291-32-9,6108-11-8,6108-12-9,6108-13-0,8007-42-9,8073-23-2,89609-19-8 |
| 5280450  | Linoleic acid                      | NHANES  | Food   | 3449.898192        | 1           | Lineolic Acids and Derivatives         | 42     | 31     | 60-33-3,506-21-8,80969-37-5,8024-22-4,949900-18-9,98353-71-0                                                                                                                         |
| 5283446  | Linoleoyl ethanolamide             | HMDB    | Endo   | 13.70005709        | 1           | Fatty Amides                           | 0      | 0      | 68171-52-8                                                                                                                                                                           |
| 6450015  | Linoleyl carnitine                 | HMDB    | Endo   | 0.060000643        | 1           | Fatty Acid Esters                      | 0      | 0      | 36816-10-1                                                                                                                                                                           |
| 864      | Lipoic acid                        | HMDB    | Endo   | 0.077003839        | 1           | Dithiolanes                            | 0      | 6      | 1077-28-7                                                                                                                                                                            |
| 5280914  | Lipoxin A4                         | HMDB    | Endo   | 7.42406E-05        | 2           | Eicosanoids                            | 0      | 19     | 89663-86-5                                                                                                                                                                           |
| 6306     | L-Isoleucine                       | HMDB    | Food   | 67.80934383        | 5           | Amino Acids and Derivatives            | 9      | 37     | 73-32-5,7004-09-3,34464-35-2,410078-51-2,501028-75-7,807611-99-0,959215-79-3                                                                                                         |
| 28486    | Lithium                            | HMDB    | Drug   | 0.1400018          | 1           | Homogeneous Alkali Metal Compounds     | 0      | 6      | 17341-24-1                                                                                                                                                                           |
| 9903     | Lithocholic acid                   | HMDB    | Endo   | 0.329987666        | 1           | Steroids and Steroid Derivatives       | 1      | 11     | 434-13-9                                                                                                                                                                             |
| 115245   | Lithocholic acid glycine conjugate | HMDB    | Endo   | 0.009000276        | 1           | Steroids and Steroid Derivatives       | 0      | 0      | 474-74-8                                                                                                                                                                             |
| 53477716 | Lithocholytaurine                  | HMDB    | Endo   | 1.05421878         | 2           | Steroids and Steroid Derivatives       | 0      | 0      | 516-90-5                                                                                                                                                                             |
| 161166   | L-Kynurenine                       | HMDB    | Endo   | 1.751723219        | 3           | Amino Acids and Derivatives            | 0      | 8      | 2922-83-0,16055-80-4                                                                                                                                                                 |
| 107689   | L-Lactic acid                      | HMDB    | Endo   | 1996.198698        | 5           | Hydroxy Acids and Derivatives          | 65     | 27     | 50-21-5                                                                                                                                                                              |
| 6106     | L-Leucine                          | HMDB    | Food   | 150.2348896        | 5           | Amino Acids and Derivatives            | 29     | 37     | 61-90-5,21675-61-6,25248-98-0,70-45-1,71000-80-1                                                                                                                                     |
| 5962     | L-Lysine                           | HMDB    | Food   | 221.0745555        | 5           | Amino Acids and Derivatives            | 40     | 48     | 56-87-1,26714-32-9,10098-89-2,20166-34-1,12798-06-0,25104-18-1,280114-50-3,48050-57-3,6899-06-5                                                                                      |
| 222656   | L-Malic acid                       | HMDB    | Endo   | 6.196595324        | 2           | Carboxylic Acids and Derivatives       | 0      | 31     | 97-67-6,124501-05-9,498-37-3,6294-10-6,84781-39-5                                                                                                                                    |
| 6137     | L-Methionine                       | HMDB    | Food   | 29.27400732        | 5           | Amino Acids and Derivatives            | 88     | 54     | 63-68-3,7005-18-7,58576-49-1,24425-78-3,26062-47-5,3654-96-4                                                                                                                         |
| 11953814 | L-Octanoylcarnitine                | HMDB    | Endo   | 0.166826655        | 2           | Fatty Acid Esters                      | 0      | 0      | 25243-95-2                                                                                                                                                                           |

| PC_CID   | Chemical             | Dataset | Source | Concentration ( $\mu\text{M}$ ) | No. studies | Class                       | PubMed | Biosys | CAS                                                                      |
|----------|----------------------|---------|--------|---------------------------------|-------------|-----------------------------|--------|--------|--------------------------------------------------------------------------|
| 3955     | Loperamide           | HMDB    | Drug   | 0.002399968                     | 1           | Diphenylmethanes            | 0      | 6      | 53179-11-6                                                               |
| 3957     | Loratadine           | HMDB    | Drug   | 1.01999732                      | 1           | Piperidines                 | 0      | 0      | 79794-75-5                                                               |
| 16902    | L-Palmitoylcarnitine | HMDB    | Endo   | 0.112996323                     | 1           | Fatty Acid Esters           | 0      | 4      | 2364-67-2                                                                |
| 6140     | L-Phenylalanine      | HMDB    | Food   | 72.95917222                     | 7           | Amino Acids and Derivatives | 12     | 46     | 63-91-2,67675-33-6,10549-09-4,3617-44-5,5297-02-9,801204-11-5,62056-68-2 |
| 145742   | L-Proline            | HMDB    | Endo   | 188.4061491                     | 5           | Amino Acids and Derivatives | 35     | 38     | 147-85-3,18875-45-1,37159-97-0,4305-67-3,4607-28-7                       |
| 53481794 | LPS core             | HMDB    | Endo   | 6.1479E-06                      | 2           | Polysaccharides             | 0      | 0      | .                                                                        |
| 53481793 | LPS with O-antigen   | HMDB    | Endo   | 3.31087E-06                     | 3           | Polysaccharides             | 0      | 0      | .                                                                        |
| 14461866 | L-Rhamnulose         | HMDB    | Food   | 0.00043699                      | 1           | Monosaccharides             | 0      | 1      | 14807-05-7                                                               |
| 5951     | L-Serine             | HMDB    | Endo   | 137.7031113                     | 8           | Amino Acids and Derivatives | 19     | 60     | 56-45-1,25821-52-7                                                       |
| 22253    | L-Threo-2-pentulose  | HMDB    | Endo   | 8.999778807                     | 1           | Monosaccharides             | 0      | 1      | 527-50-4                                                                 |
| 6288     | L-Threonine          | HMDB    | Food   | 148.4280012                     | 6           | Amino Acids and Derivatives | 23     | 34     | 72-19-5,13095-55-1,25275-17-6,36676-50-3,7013-32-3                       |
| 5461103  | L-Thyronine          | HMDB    | Endo   | 0.289992563                     | 1           | Amino Acids and Derivatives | 0      | 1      | 1596-67-4                                                                |
| 6305     | L-Tryptophan         | HMDB    | Food   | 52.84166556                     | 5           | Amino Acids and Derivatives | 17     | 46     | 73-22-3,6912-86-3,80206-30-0                                             |
| 6057     | L-Tyrosine           | HMDB    | Endo   | 81.20688222                     | 6           | Amino Acids and Derivatives | 51     | 58     | 60-18-4,55520-40-6,140-43-2,1991-85-1,25619-78-7,46209-14-7              |
| 5281243  | Lutein               | NHANES  | Food   | 0.242585756                     | 1           | Prenol Lipids               | 20     | 1      | 127-40-2                                                                 |
| 6287     | L-Valine             | HMDB    | Food   | 233.4808358                     | 5           | Amino Acids and Derivatives | 80     | 39     | 72-18-4,7004-03-7,16872-32-5                                             |
| 446925   | Lycopene             | NHANES  | Food   | 0.693641516                     | 1           | Prenol Lipids               | 62     | 2      | 502-65-8                                                                 |
| 460604   | LysoPC(14:0)         | HMDB    | Endo   | 3.616114114                     | 3           | Glycerophospholipids        | 0      | 0      | 20559-16-4                                                               |
| 24779456 | LysoPC(14:1(9Z))     | HMDB    | Endo   | 0.210999398                     | 1           | Glycerophospholipids        | 0      | 0      | .                                                                        |
| 24779458 | LysoPC(15:0)         | HMDB    | Endo   | 1.764028299                     | 1           | Glycerophospholipids        | 0      | 0      | .                                                                        |
| 10917802 | LysoPC(16:0)         | HMDB    | Endo   | 117.0147506                     | 3           | Glycerophospholipids        | 0      | 0      | .                                                                        |
| 24779461 | LysoPC(16:1(9Z))     | HMDB    | Endo   | 2.670324498                     | 3           | Glycerophospholipids        | 0      | 0      | .                                                                        |
| 24779463 | LysoPC(17:0)         | HMDB    | Endo   | 2.550016934                     | 1           | Glycerophospholipids        | 0      | 0      | 50930-23-9                                                               |
| 24779527 | LysoPC(18:0)         | HMDB    | Endo   | 47.85616741                     | 3           | Glycerophospholipids        | 0      | 0      | .                                                                        |
| 53480465 | LysoPC(18:1(11Z))    | HMDB    | Endo   | 7.499227386                     | 3           | Glycerophospholipids        | 0      | 0      | .                                                                        |



| PC_CID   | Chemical                            | Dataset | Source | Concentration (µM) | No. studies | Class                                      | PubMed | Biosys | CAS                   |
|----------|-------------------------------------|---------|--------|--------------------|-------------|--------------------------------------------|--------|--------|-----------------------|
| 16081932 | LysoPC(18:1(9Z))                    | HMDB    | Endo   | 35.36066344        | 3           | Glycerophospholipids                       | 0      | 0      | 3542-29-8             |
| 11005824 | LysoPC(18:2(9Z,12Z))                | HMDB    | Endo   | 43.8642659         | 3           | Glycerophospholipids                       | 0      | 0      | .                     |
| 52924045 | LysoPC(18:3(6Z,9Z,12Z))             | HMDB    | Endo   | 0.234007994        | 1           | Glycerophospholipids                       | 0      | 0      | .                     |
| 24779469 | LysoPC(18:3(9Z,12Z,15Z))            | HMDB    | Endo   | 1.238994297        | 1           | Glycerophospholipids                       | 0      | 0      | .                     |
| 52924047 | LysoPC(18:4(6Z,9Z,12Z,15Z))         | HMDB    | Endo   | 0.285989552        | 1           | Glycerophospholipids                       | 0      | 0      | .                     |
| 24779473 | LysoPC(20:0)                        | HMDB    | Endo   | 0.687976912        | 1           | Glycerophospholipids                       | 0      | 0      | .                     |
| 52924051 | LysoPC(20:1(11Z))                   | HMDB    | Endo   | 0.525975839        | 1           | Glycerophospholipids                       | 0      | 0      | .                     |
| 52924053 | LysoPC(20:2(11Z,14Z))               | HMDB    | Endo   | 0.711983886        | 1           | Glycerophospholipids                       | 0      | 0      | .                     |
| 53480467 | LysoPC(20:3(5Z,8Z,11Z))             | HMDB    | Endo   | 0.549910358        | 3           | Glycerophospholipids                       | 0      | 0      | .                     |
| 52924055 | LysoPC(20:3(8Z,11Z,14Z))            | HMDB    | Endo   | 2.715836475        | 3           | Glycerophospholipids                       | 0      | 0      | .                     |
| 24779476 | LysoPC(20:4(5Z,8Z,11Z,14Z))         | HMDB    | Endo   | 7.55795008         | 3           | Glycerophospholipids                       | 0      | 0      | .                     |
| 53480469 | LysoPC(20:4(8Z,11Z,14Z,17Z))        | HMDB    | Endo   | 0.740744143        | 3           | Glycerophospholipids                       | 0      | 0      | .                     |
| 11757087 | LysoPC(20:5(5Z,8Z,11Z,14Z,17Z))     | HMDB    | Endo   | 1.608014197        | 1           | Glycerophospholipids                       | 0      | 0      | 162440-04-2           |
| 24779479 | LysoPC(22:0)                        | HMDB    | Endo   | 0.42998713         | 1           | Glycerophospholipids                       | 0      | 0      | .                     |
| 53480471 | LysoPC(22:1(13Z))                   | HMDB    | Endo   | 0.568985687        | 1           | Glycerophospholipids                       | 0      | 0      | .                     |
| 52924059 | LysoPC(22:2(13Z,16Z))               | HMDB    | Endo   | 0.094997947        | 1           | Glycerophospholipids                       | 0      | 0      | .                     |
| 52924039 | LysoPC(22:4(7Z,10Z,13Z,16Z))        | HMDB    | Endo   | 0.063998221        | 1           | Glycerophospholipids                       | 0      | 0      | .                     |
| 53480473 | LysoPC(22:5(4Z,7Z,10Z,13Z,16Z))     | HMDB    | Endo   | 0.10700283         | 1           | Glycerophospholipids                       | 0      | 0      | .                     |
| 53480475 | LysoPC(22:5(7Z,10Z,13Z,16Z,19Z))    | HMDB    | Endo   | 0.742969712        | 1           | Glycerophospholipids                       | 0      | 0      | .                     |
| 10415542 | LysoPC(22:6(4Z,7Z,10Z,13Z,16Z,19Z)) | HMDB    | Endo   | 2.780136424        | 1           | Glycerophospholipids                       | 0      | 0      | .                     |
| 24779481 | LysoPC(24:0)                        | HMDB    | Endo   | 0.210662069        | 3           | Glycerophospholipids                       | 0      | 0      | .                     |
| 53480477 | LysoPC(24:1(15Z))                   | HMDB    | Endo   | 0.727966681        | 1           | Glycerophospholipids                       | 0      | 0      | .                     |
| .        | LysoPC(P-16:0)                      | HMDB    | Endo   | 0.928021851        | 1           | Glycerophospholipids                       | .      | .      | .                     |
| .        | LysoPC(P-18:0)                      | HMDB    | Endo   | 0.066997498        | 1           | Glycerophospholipids                       | .      | .      | .                     |
| 24779513 | LysoPC(P-18:1(9Z))                  | HMDB    | Endo   | 0.093331277        | 2           | Glycerophospholipids                       | 0      | 0      | .                     |
| 7809     | m/p-Xylene                          | NHANES  | Pollut | 0.001327577        | 3           | Aromatic Homomonocyclic Compounds          | 0      | 1      | 106-42-3              |
| 888      | Magnesium                           | HMDB    | Food   | 832.9719765        | 1           | Homogeneous Alkaline Earth Metal Compounds | 135    | 209    | 22537-22-0,71763-40-1 |
| 10964    | Malondialdehyde                     | HMDB    | Endo   | 1.276089087        | 2           | Carbonyl Compounds                         | 122    | 5      | 542-78-9              |
| 867      | Malonic acid                        | HMDB    | Endo   | 10.02818873        | 3           | Carboxylic Acids and Derivatives           | 0      | 2      | 141-82-2              |

| PC_CID   | Chemical                        | Dataset | Source | Concentration (µM) | No. studies | Class                                  | PubMed | Biosys | CAS                                                                                              |
|----------|---------------------------------|---------|--------|--------------------|-------------|----------------------------------------|--------|--------|--------------------------------------------------------------------------------------------------|
| 23930    | Manganese                       | HMDB    | Food   | 0.041585655        | 2           | Homogeneous Transition Metal Compounds | 2      | 105    | 7439-96-5,19768-33-3,13966-31-9,17375-02-9,195161-78-5,22325-60-6,39303-06-5,8031-40-1,8075-39-6 |
| 6251     | Mannitol                        | HMDB    | Food   | 34.00134219        | 1           | Fatty Alcohols                         | 10     | 2      | 69-65-8,87-78-5,123897-58-5,133-43-7,36413-61-3,5149-40-6,75398-80-0,85085-15-0                  |
| 637541   | m-Coumaric acid                 | HMDB    | Food   | 0.028438825        | 8           | Cinnamic Acid Derivatives              | 0      | 1      | 588-30-7                                                                                         |
| 6325610  | Melanin                         | HMDB    | Endo   | 5184.869751        | 2           | Indolequinones                         | 0      | 1      | 8049-97-6                                                                                        |
| 896      | Melatonin                       | HMDB    | Endo   | 6.14799E-05        | 2           | Indoles                                | 15     | 24     | 73-31-4                                                                                          |
| 16666    | Menthol                         | HMDB    | Food   | 0.063998221        | 1           | Prenol Lipids                          | 0      | 0      | 2216-51-5                                                                                        |
| 26623    | Mercury                         | NHANES  | Pollut | 0.004097821        | 4           | Homogeneous Transition Metal Compounds | 21     | 0      | 14302-87-5                                                                                       |
| 688084   | Metanephrine                    | HMDB    | Endo   | 0.001599923        | 1           | Phenols and Derivatives                | 0      | 2      | 5001-33-2                                                                                        |
| 878      | Methanethiol                    | HMDB    | Endo   | 5.700192807        | 1           | Thiols                                 | 0      | 2      | 74-93-1                                                                                          |
| 887      | Methanol                        | HMDB    | Endo   | 60.44295333        | 2           | Alcohols and Polyols                   | 1      | 3      | 67-56-1,31648-08-5,14742-26-8,54841-71-3                                                         |
| 158980   | Methionine sulfoxide            | HMDB    | Endo   | 4.000022556        | 1           | Amino Acids and Derivatives            | 1      | 1      | 3226-65-1,86631-49-4                                                                             |
| 6329     | Methylamine                     | HMDB    | Endo   | 1                  | 1           | Alkylamines                            | 0      | 5      | 74-89-5                                                                                          |
| 24417    | Methylcysteine                  | HMDB    | Food   | 3.900091444        | 1           | Amino Acids and Derivatives            | 0      | 0      | 1187-84-4                                                                                        |
| 10111    | Methylguanidine                 | HMDB    | Endo   | 0.024999486        | 1           | Guanidines                             | 0      | 0      | 471-29-4                                                                                         |
| 75810    | Methylimidazoleacetic acid      | HMDB    | Endo   | 0.084567944        | 1           | Azoles                                 | 0      | 1      | 2625-49-2                                                                                        |
| 487      | Methylmalonic acid              | NHANES  | Endo   | 0.134002074        | 1           | Carboxylic Acids and Derivatives       | 14     | 3      | 516-05-2                                                                                         |
| 15413    | Methyl-t-butyl ether            | NHANES  | Pollut | 0.117501991        | 3           | Aliphatic Acyclic Compounds            | 0      | 0      | 1634-04-4                                                                                        |
| 4171     | Metoprolol                      | HMDB    | Drug   | 0.070998254        | 1           | Phenols and Derivatives                | 34     | 0      | 51384-51-1,37350-58-6,54163-88-1                                                                 |
| 439230   | Mevalonic acid                  | HMDB    | Endo   | 0.034697071        | 2           | Hydroxy Acids and Derivatives          | 0      | 7      | 17817-88-8                                                                                       |
| 5319879  | MG(0:0/18:1(9Z)/0:0)            | HMDB    | Endo   | 166.0020271        | 1           | Glycerolipids                          | 0      | 0      | 3443-84-3                                                                                        |
| 5365676  | MG(0:0/18:2(9Z,12Z)/0:0)        | HMDB    | Endo   | 145.9990332        | 1           | Lineolic Acids and Derivatives         | 0      | 0      | 3443-82-1                                                                                        |
| 12178130 | MG(18:1(9Z)/0:0/0:0)            | HMDB    | Endo   | 170.0002657        | 1           | Glycerolipids                          | 0      | 0      | .                                                                                                |
| 6436630  | MG(18:2(9Z,12Z)/0:0/0:0)        | HMDB    | Endo   | 37.59984771        | 1           | Lineolic Acids and Derivatives         | 0      | 0      | 107380-08-5                                                                                      |
| 16019980 | MG(20:4(5Z,8Z,11Z,14Z)/0:0/0:0) | HMDB    | Endo   | 4.710056954        | 1           | Eicosanoids                            | 0      | 0      | 124511-15-5                                                                                      |

| PC_CID   | Chemical                      | Dataset | Source | Concentration (µM) | No. studies | Class                                  | PubMed | Biosys | CAS                                                                                                                                    |
|----------|-------------------------------|---------|--------|--------------------|-------------|----------------------------------------|--------|--------|----------------------------------------------------------------------------------------------------------------------------------------|
| 16945    | Mirex                         | HMDB    | Pollut | 4.00012E-05        | 1           | Organo-chlorine Pesticides             | 1      | 0      | 2385-85-5,12557-88-9,12707-43-6,12766-04-0,20594-49-4,56449-78-6                                                                       |
| 185498   | Molybdenum                    | HMDB    | Food   | 0.006779174        | 2           | Homogeneous Transition Metal Compounds | 0      | 0      | 7439-98-7                                                                                                                              |
| 92272    | Monoisobutyl phthalic acid    | HMDB    | Food   | 0.002199995        | 1           | Benzoic Acid and Derivatives           | 0      | 0      | 30833-53-5                                                                                                                             |
| 11492    | m-Tyramine                    | HMDB    | Endo   | 3.80009E-05        | 1           | Phenethylamines                        | 0      | 0      | 588-05-6                                                                                                                               |
| 892      | Myoinositol                   | HMDB    | Endo   | 23.06923704        | 4           | Cyclic Alcohols and Derivatives        | 5      | 24     | 87-89-8,6917-35-7,643-12-9,488-59-5,551-72-4,488-55-1,643-10-7,488-58-4,173524-45-3,38876-99-2,41546-34-3,488-54-0,53319-35-0,576-63-6 |
| 890      | Myo-inositol hexakisphosphate | HMDB    | Endo   | 0.340003285        | 1           | Cyclic Alcohols and Derivatives        | 2      | 11     | 83-86-3,50762-79-3,78039-41-5,894854-44-5                                                                                              |
| 5281672  | Myricetin                     | HMDB    | Food   | 45.00168799        | 1           | Flavonoids                             | 1      | 0      | 529-44-2                                                                                                                               |
| 11005    | Myristic acid                 | NHANES  | Endo   | 118.9972044        | 1           | Fatty Acids and Conjugates             | 0      | 14     | 544-63-8,32112-52-0,45184-05-2                                                                                                         |
| 5281119  | Myristoleic acid              | NHANES  | Endo   | 6.569909121        | 1           | Fatty Acids and Conjugates             | 0      | 0      | 544-64-9                                                                                                                               |
| 164795   | N(6)-Methyllysine             | HMDB    | Endo   | 6.999928957        | 1           | Amino Acids and Derivatives            | 0      | 0      | 1188-07-4                                                                                                                              |
| 496      | N1-Acetylspermidine           | HMDB    | Endo   | 0.007000316        | 1           | Carboxylic Acids and Derivatives       | 0      | 8      | 14278-49-0                                                                                                                             |
| 92919    | N2,N2-Dimethylguanosine       | HMDB    | Endo   | 0.029983741        | 2           | Purine Nucleosides and Analogues       | 0      | 0      | 2140-67-2                                                                                                                              |
| 143      | N5-Formyl-THF                 | HMDB    | Endo   | 0.002499911        | 1           | Pteridines and Derivatives             | 52     | 4      | 54353-24-1,58-05-9,121451-09-0                                                                                                         |
| 123689   | N8-Acetylspermidine           | HMDB    | Endo   | 0.050001614        | 1           | Carboxylic Acids and Derivatives       | 0      | 0      | 34450-15-2                                                                                                                             |
| 67427    | N-a-Acetyl-L-arginine         | HMDB    | Endo   | 1.249945562        | 1           | Amino Acids and Derivatives            | 0      | 0      | 155-84-0                                                                                                                               |
| 5255     | N-Acetylaspartylglutamic acid | HMDB    | Endo   | 4.890037636        | 1           | Peptides                               | 0      | 0      | 3106-85-2                                                                                                                              |
| 439197   | N-Acetylneuraminic acid       | HMDB    | Endo   | 1.067692737        | 2           | Sugar Acids and Derivatives            | 45     | 6      | 131-48-6                                                                                                                               |
| 439232   | N-Acetylorithine              | HMDB    | Endo   | 1.099988802        | 1           | Amino Acids and Derivatives            | 0      | 5      | 6205-08-9                                                                                                                              |
| 15938971 | NAD                           | HMDB    | Endo   | 24.0011081         | 1           | Purine Nucleotides                     | 1      | 87     | 53-84-9                                                                                                                                |
| 21604869 | NADH                          | HMDB    | Endo   | 21.99906605        | 1           | Purine Nucleotides                     | 0      | 80     | 58-68-4                                                                                                                                |
| 5884     | NADPH                         | HMDB    | Endo   | 50.99869275        | 1           | Purine Nucleotides                     | 0      | 118    | 53-57-6,2646-71-1,22046-90-8,3545-01-5                                                                                                 |

| PC_CID   | Chemical                  | Dataset | Source | Concentration (µM) | No. studies | Class                                  | PubMed | Biosys | CAS                                                                        |
|----------|---------------------------|---------|--------|--------------------|-------------|----------------------------------------|--------|--------|----------------------------------------------------------------------------|
| 9904     | Nandrolone                | HMDB    | Endo   | 0.014500096        | 1           | Steroids and Steroid Derivatives       | 1      | 0      | 434-22-0                                                                   |
| 156391   | Naproxen                  | HMDB    | Drug   | 301.9918409        | 1           | Acenes                                 | 3      | 0      | 22204-53-1                                                                 |
| 5283389  | N-Arachidonoyl glycine    | HMDB    | Endo   | 1.090024311        | 1           | Amino Acids and Derivatives            | 0      | 6      | .                                                                          |
| 439246   | Naringenin                | HMDB    | Food   | 0.02000046         | 1           | Flavonoids                             | 0      | 1      | 480-41-1                                                                   |
| 448839   | Neopterin                 | HMDB    | Endo   | 0.006993319        | 3           | Pteridines and Derivatives             | 40     | 1      | 2009-64-5                                                                  |
| 5281120  | Nervonic acid             | NHANES  | Endo   | 74.90345368        | 1           | Fatty Acids and Conjugates             | 2      | 1      | 506-37-6                                                                   |
| 513472   | Neuraminic acid           | HMDB    | Endo   | 0.570010783        | 1           | Sugar Acids and Derivatives            | 0      | 0      | 114-04-5                                                                   |
| 936      | Niacinamide               | HMDB    | Endo   | 0.439991443        | 1           | Pyridines and Derivatives              | 10     | 16     | 98-92-0,123574-63-0,37321-14-5,78731-47-2,11032-50-1,55600-01-6,63748-44-7 |
| 934      | Nickel                    | HMDB    | Pollut | 0.066810168        | 4           | Homogeneous Transition Metal Compounds | 7      | 1      | 14701-22-5                                                                 |
| 72661    | Nicotinamide N-oxide      | HMDB    | Endo   | 282.9867283        | 1           | Pyridines and Derivatives              | 0      | 0      | 1986-81-8                                                                  |
| 938      | Nicotinic acid            | HMDB    | Food   | 51.11101338        | 2           | Pyridines and Derivatives              | 35     | 16     | 59-67-6,123574-58-3                                                        |
| 68499    | Nicotinuric acid          | HMDB    | Endo   | 5.770738143        | 2           | Amino Acids and Derivatives            | 0      | 1      | 583-08-4                                                                   |
| 944      | Nitrate                   | HMDB    | Endo   | 39.6979679         | 2           | Non-metal Oxoanionic Compounds         | 0      | 8      | 7697-37-2                                                                  |
| 145068   | Nitric oxide              | HMDB    | Endo   | 1.2E-05            | 1           | Other Non-metal Organides              | 223    | 34     | 10102-43-9                                                                 |
| 946      | Nitrite                   | HMDB    | Endo   | 8.667669897        | 4           | Non-metal Oxoanionic Compounds         | 0      | 4      | 14797-65-0                                                                 |
| 5283454  | N-Oleoylethanolamine      | HMDB    | Endo   | 0.410450476        | 2           | Fatty Amides                           | 0      | 0      | 111-58-0                                                                   |
| 5312513  | Nonadeca-10(Z)-enoic acid | HMDB    | Endo   | 0.645971431        | 1           | Fatty Acids and Conjugates             | 0      | 0      | 67228-95-9                                                                 |
| 53481660 | Nonanoylcarnitine         | HMDB    | Endo   | 0.029998737        | 1           | Fatty Acid Esters                      | 0      | 0      | .                                                                          |
| 92223    | Norcotinine               | HMDB    | Pollut | 0.051001512        | 1           | Pyrrolidinylpyridines                  | 0      | 2      | 5980-06-3                                                                  |
| 439260   | Norepinephrine            | HMDB    | Endo   | 0.0026439          | 3           | Phenols and Derivatives                | 117    | 48     | 51-41-2,4899-05-2,66197-73-7                                               |
| 123747   | Norepinephrine sulfate    | HMDB    | Endo   | 0.007937158        | 2           | Phenols and Derivatives                | 0      | 0      | 77469-51-3                                                                 |
| 1237     | Normetanephrine           | HMDB    | Endo   | 0.000326004        | 3           | Phenols and Derivatives                | 5      | 1      | 97-31-4,17484-20-7                                                         |
| 126923   | N-Ribosylhistidine        | HMDB    | Endo   | 0.072999696        | 1           | Amino Acids and Derivatives            | 0      | 0      | 98379-91-0                                                                 |
| 18636    | OCDD                      | NHANES  | Pollut | 5.02995E-06        | 1           | Chlorinated-p-dibenzo Dioxins          | 0      | 0      | 3268-87-9                                                                  |
| 89472    | O-Desmethylangolensin     | HMDB    | Food   | 0.000618694        | 2           | Stilbenes                              | 2      | 0      | 21255-69-6                                                                 |
| 10494    | Oleanolic acid            | HMDB    | Endo   | 0.025998927        | 1           | Prenol Lipids                          | 1      | 0      | 508-02-1                                                                   |

| PC_CID   | Chemical                       | Dataset | Source | Concentration (µM) | No. studies | Class                                    | PubMed | Biosys | CAS                                                                    |
|----------|--------------------------------|---------|--------|--------------------|-------------|------------------------------------------|--------|--------|------------------------------------------------------------------------|
| 445639   | Oleic acid                     | NHANES  | Endo   | 2100.01549         | 1           | Fatty Acids and Conjugates               | 25     | 29     | 112-80-1,17156-84-2,56833-51-3,68412-07-7,8046-01-3,949900-16-7        |
| 6436908  | Oleoyl glycine                 | HMDB    | Endo   | 20.99952881        | 1           | Amino Acids and Derivatives              | 0      | 0      | 2601-90-3                                                              |
| 4594     | Omeprazole                     | HMDB    | Drug   | 0.340003285        | 1           | Benzimidazoles                           | 7      | 5      | 73590-58-6,119141-89-8,131959-78-9,172964-80-6,119141-88-7,161796-78-7 |
| 1015     | O-Phosphoethanolamine          | HMDB    | Endo   | 4.000022556        | 1           | Organic Phosphoric Acids and Derivatives | 0      | 13     | 1071-23-4                                                              |
| 134490   | Ornithine                      | HMDB    | Endo   | 71.35732489        | 6           | Amino Acids and Derivatives              | 0      | 15     | 1758-80-1                                                              |
| 967      | Orotic acid                    | HMDB    | Endo   | 2.109603468        | 2           | Amino Acids and Derivatives              | 1      | 7      | 65-86-1,50887-69-9                                                     |
| 92751    | Orotidine                      | HMDB    | Endo   | 148.9931006        | 1           | Pyrimidine Nucleosides and Analogues     | 0      | 0      | 314-50-1                                                               |
| 11970    | Ortho-Hydroxyphenylacetic acid | HMDB    | Food   | 0.324263118        | 8           | Phenylacetic Acid Derivatives            | 0      | 2      | 614-75-5                                                               |
| 971      | Oxalic acid                    | HMDB    | Drug   | 10.95066297        | 3           | Carboxylic Acids and Derivatives         | 1      | 5      | 144-62-7,1068-63-9,2847-15-6,547-66-0,553-91-3,216451-38-6,63504-28-9  |
| 65359    | Oxidized glutathione           | HMDB    | Endo   | 1.689951787        | 1           | Peptides                                 | 7      | 19     | 27025-41-8,10421-65-5                                                  |
| 51       | Oxoglutaric acid               | HMDB    | Endo   | 7.89318714         | 2           | Keto-Acids and Derivatives               | 0      | 75     | 328-50-7,27175-99-1,34410-46-3                                         |
| 46174053 | Oxychlorane                    | NHANES  | Pollut | 0.000152782        | 2           | Organo-chlorine Pesticides               | 1      | 0      | 27304-13-8                                                             |
| 7237     | o-Xylene                       | NHANES  | Pollut | 0.00034849         | 1           | Aromatic Homomonocyclic Compounds        | 0      | 1      | 95-47-6                                                                |
| 4644     | Oxypurinol                     | HMDB    | Endo   | 49.99884974        | 1           | Imidazopyrimidines                       | 0      | 0      | 2465-59-0                                                              |
| 46891879 | PA(16:0/16:0)                  | HMDB    | Endo   | 0.186001601        | 1           | Glycerophospholipids                     | 0      | 0      | 169051-60-9                                                            |
| 9547158  | PA(16:0/18:1(11Z))             | HMDB    | Endo   | 0.147003336        | 1           | Glycerophospholipids                     | 0      | 0      | .                                                                      |
| 46891859 | PA(16:0/18:2(9Z,12Z))          | HMDB    | Endo   | 0.144006045        | 1           | Glycerophospholipids                     | 0      | 0      | 322647-59-6                                                            |
| 46891863 | PA(18:0/18:2(9Z,12Z))          | HMDB    | Endo   | 0.222996322        | 1           | Glycerophospholipids                     | 0      | 0      | 474943-29-8                                                            |
| 53478602 | PA(18:1(11Z)/18:1(11Z))        | HMDB    | Endo   | 0.222996322        | 1           | Glycerophospholipids                     | 0      | 0      | .                                                                      |
| 5282745  | Palmitelaidic acid             | HMDB    | Food   | 1.969933922        | 1           | Fatty Acids and Conjugates               | 10     | 0      | 2091-29-4,10030-73-6,373-49-9                                          |
| 985      | Palmitic acid                  | NHANES  | Endo   | 2709.989393        | 1           | Fatty Acids and Conjugates               | 12     | 60     | 57-10-3,116860-99-2,212625-86-0,60605-23-4,66321-94-6,67701-02-4       |
| 445638   | Palmitoleic acid               | NHANES  | Endo   | 217.0005743        | 1           | Fatty Acids and Conjugates               | 10     | 10     | 373-49-9                                                               |
| 4671     | Palmitoylethanolamide          | HMDB    | Endo   | 0.571209064        | 2           | Fatty Amides                             | 0      | 0      | 544-31-0                                                               |

| PC_CID   | Chemical            | Dataset | Source | Concentration (µM) | No. studies | Class                        | PubMed | Biosys | CAS                  |
|----------|---------------------|---------|--------|--------------------|-------------|------------------------------|--------|--------|----------------------|
| 978      | p-Aminobenzoic acid | HMDB    | Drug   | 15.000747          | 1           | Benzoic Acid and Derivatives | 0      | 6      | 150-13-0             |
| 4679     | Pantoprazole        | HMDB    | Drug   | 10.00014907        | 1           | Benzimidazoles               | 0      | 0      | 102625-70-7          |
| 988      | Pantothenic acid    | HMDB    | Food   | 3.747166671        | 2           | Alkylamines                  | 0      | 8      | 79-83-4              |
| 4687     | Paraxanthine        | HMDB    | Endo   | 10.00014907        | 1           | Imidazopyrimidines           | 0      | 10     | 611-59-6             |
| 42948    | PBB153              | NHANES  | Pollut | 2.43885E-05        | 1           | Brominated Biphenyls         | 0      | 0      | 59080-40-9           |
| 53478671 | PC(16:0/16:0)       | HMDB    | Endo   | 584.5837176        | 1           | Glycerophospholipids         | 0      | 0      | 63-89-8              |
| 37807    | PCB101              | NHANES  | Pollut | 3.37848E-05        | 1           | Chlorinated Biphenyls        | .      | .      | 37680-73-2           |
| 36188    | PCB105              | NHANES  | Pollut | 2.45721E-05        | 1           | Chlorinated Biphenyls        | .      | .      | 32598-14-4           |
| 38015    | PCB110              | NHANES  | Pollut | 2.49809E-05        | 1           | Chlorinated Biphenyls        | .      | .      | 38380-03-9           |
| 35823    | PCB118              | NHANES  | Pollut | 0.000122856        | 1           | Chlorinated Biphenyls        | .      | .      | 31508-00-6           |
| 63090    | PCB126              | NHANES  | Pollut | 3.93888E-07        | 2           | Chlorinated Biphenyls        | .      | .      | 57465-28-8           |
| 37035    | PCB138_158          | NHANES  | Pollut | 0.000321054        | 2           | Chlorinated Biphenyls        | .      | .      | 35065-28-2           |
| 40234    | PCB146              | NHANES  | Pollut | 4.01897E-05        | 1           | Chlorinated Biphenyls        | .      | .      | 52112-04-6           |
| 38016    | PCB149              | NHANES  | Pollut | 1.10763E-05        | 1           | Chlorinated Biphenyls        | .      | .      | 38380-04-0           |
| 37034    | PCB153              | NHANES  | Pollut | 0.000429839        | 2           | Chlorinated Biphenyls        | .      | .      | 35065-27-1           |
| 38019    | PCB156              | NHANES  | Pollut | 4.70453E-05        | 1           | Chlorinated Biphenyls        | .      | .      | 38380-08-4           |
| 50891    | PCB157              | NHANES  | Pollut | 1.12056E-05        | 1           | Chlorinated Biphenyls        | .      | .      | 69782-90-7           |
| 40479    | PCB167              | NHANES  | Pollut | 9.1496E-06         | 1           | Chlorinated Biphenyls        | .      | .      | 52663-72-6           |
| 36231    | PCB169              | NHANES  | Pollut | 0.000331527        | 1           | Chlorinated Biphenyls        | .      | .      | 32774-16-6,1336-36-3 |
| 37037    | PCB170              | NHANES  | Pollut | 9.23154E-05        | 1           | Chlorinated Biphenyls        | .      | .      | 35065-30-6           |
| 40481    | PCB172              | NHANES  | Pollut | 1.09398E-05        | 1           | Chlorinated Biphenyls        | .      | .      | 52663-74-8           |
| 40477    | PCB177              | NHANES  | Pollut | 1.91062E-05        | 1           | Chlorinated Biphenyls        | .      | .      | 52663-70-4           |
| 40474    | PCB178              | NHANES  | Pollut | 1.57747E-05        | 1           | Chlorinated Biphenyls        | .      | .      | 52663-67-9           |
| 37036    | PCB180              | NHANES  | Pollut | 0.000287899        | 2           | Chlorinated Biphenyls        | .      | .      | 35065-29-3           |
| 40476    | PCB183              | NHANES  | Pollut | 2.45156E-05        | 1           | Chlorinated Biphenyls        | .      | .      | 52663-69-1           |
| 40475    | PCB187              | NHANES  | Pollut | 7.15224E-05        | 1           | Chlorinated Biphenyls        | .      | .      | 52663-68-0           |
| 37251    | PCB194              | NHANES  | Pollut | 4.18382E-05        | 1           | Chlorinated Biphenyls        | .      | .      | 31472-83-0           |
| 40485    | PCB195              | NHANES  | Pollut | 1.24424E-05        | 1           | Chlorinated Biphenyls        | .      | .      | 52663-78-2           |
| 39253    | PCB196_203          | NHANES  | Pollut | 5.24107E-05        | 1           | Chlorinated Biphenyls        | .      | .      | 42740-50-1           |
| 40482    | PCB199              | NHANES  | Pollut | 4.37027E-05        | 1           | Chlorinated Biphenyls        | .      | .      | 52663-75-9           |
| 38411    | PCB206              | NHANES  | Pollut | 3.06708E-05        | 1           | Chlorinated Biphenyls        | .      | .      | 40186-72-9           |

| PC_CID   | Chemical                             | Dataset | Source | Concentration (µM) | No. studies | Class                      | PubMed | Biosys | CAS                                               |
|----------|--------------------------------------|---------|--------|--------------------|-------------|----------------------------|--------|--------|---------------------------------------------------|
| 16318    | PCB209                               | NHANES  | Pollut | 2.01582E-05        | 1           | Chlorinated Biphenyls      | .      | .      | 2051-24-3                                         |
| 23448    | PCB28                                | NHANES  | Pollut | 0.000127168        | 1           | Chlorinated Biphenyls      | .      | .      | 7012-37-5                                         |
| 38875    | PCB44                                | NHANES  | Pollut | 4.71583E-05        | 1           | Chlorinated Biphenyls      | .      | .      | 41464-39-5                                        |
| 38876    | PCB49                                | NHANES  | Pollut | 2.95301E-05        | 1           | Chlorinated Biphenyls      | .      | .      | 41464-40-8                                        |
| 37248    | PCB52                                | NHANES  | Pollut | 6.08925E-05        | 1           | Chlorinated Biphenyls      | .      | .      | 35693-99-3                                        |
| 36185    | PCB66                                | NHANES  | Pollut | 3.18173E-05        | 1           | Chlorinated Biphenyls      | .      | .      | 32598-10-0                                        |
| 36218    | PCB74                                | NHANES  | Pollut | 0.000110102        | 1           | Chlorinated Biphenyls      | .      | .      | 32690-93-0                                        |
| 38014    | PCB87                                | NHANES  | Pollut | 1.34329E-05        | 1           | Chlorinated Biphenyls      | .      | .      | 38380-02-8                                        |
| 38013    | PCB99                                | NHANES  | Pollut | 8.51837E-05        | 1           | Chlorinated Biphenyls      | .      | .      | 38380-01-7                                        |
| .        | PCBs (all)                           | NHANES  | Pollut | .                  | .           | Chlorinated Biphenyls      | 92     | 0      | .                                                 |
| 637542   | p-coumaric acid                      | HMDB    | Food   | 0.114211875        | 8           | Cinnamic Acid Derivatives  | 0      | 3      | 7400-08-0                                         |
| 13849    | Pentadecanoic acid                   | HMDB    | Endo   | 1.330560125        | 3           | Fatty Acids and Conjugates | 0      | 18     | 1002-84-2                                         |
| 9555     | Perfluorodecanoic acid               | NHANES  | Pollut | 0.00059295         | 3           | Perfluorinated Compounds   | 0      | 0      | 335-76-2                                          |
| 67734    | Perfluorohexane sulfonic acid        | NHANES  | Pollut | 0.004647155        | 5           | Perfluorinated Compounds   | 0      | 0      | 355-46-4                                          |
| 67821    | Perfluorononanoic acid               | NHANES  | Pollut | 0.002283605        | 5           | Perfluorinated Compounds   | 0      | 0      | 375-95-1                                          |
| 74483    | Perfluorooctane sulfonic acid        | NHANES  | Pollut | 0.033517084        | 5           | Perfluorinated Compounds   | 2      | 0      | 1763-23-1,132324-11-9                             |
| 9554     | Perfluorooctanoic acid               | NHANES  | Pollut | 0.00965287         | 5           | Perfluorinated Compounds   | 4      | 0      | 335-67-1,2395-00-8,335-93-3,65618-66-8,71244-15-0 |
| 5289145  | PG(16:0/18:1(11Z))                   | HMDB    | Endo   | 0.603988573        | 1           | Glycerophospholipids       | 0      | 0      | .                                                 |
| 52927246 | PG(16:0/18:2(9Z,12Z))                | HMDB    | Endo   | 0.080002292        | 1           | Glycerophospholipids       | 0      | 0      | .                                                 |
| 53480603 | PG(16:0/20:3(5Z,8Z,11Z))             | HMDB    | Endo   | 0.338003172        | 1           | Glycerophospholipids       | 0      | 0      | .                                                 |
| 24779550 | PG(16:0/20:4(5Z,8Z,11Z,14Z))         | HMDB    | Endo   | 0.21699087         | 1           | Glycerophospholipids       | 0      | 0      | .                                                 |
| 52927231 | PG(16:0/22:4(7Z,10Z,13Z,16Z))        | HMDB    | Endo   | 0.190996534        | 1           | Glycerophospholipids       | 0      | 0      | .                                                 |
| 53480604 | PG(16:0/22:5(4Z,7Z,10Z,13Z,16Z))     | HMDB    | Endo   | 0.605016227        | 1           | Glycerophospholipids       | 0      | 0      | .                                                 |
| 52926307 | PG(16:0/22:6(4Z,7Z,10Z,13Z,16Z,19Z)) | HMDB    | Endo   | 0.918971655        | 1           | Glycerophospholipids       | 0      | 0      | .                                                 |
| 52926476 | PG(16:1(9Z)/18:0)                    | HMDB    | Endo   | 0.603988573        | 1           | Glycerophospholipids       | 0      | 0      | .                                                 |
| 53480606 | PG(16:1(9Z)/18:1(11Z))               | HMDB    | Endo   | 0.080002292        | 1           | Glycerophospholipids       | 0      | 0      | .                                                 |
| 53480607 | PG(16:1(9Z)/20:3(5Z,8Z,11Z))         | HMDB    | Endo   | 0.21699087         | 1           | Glycerophospholipids       | 0      | 0      | .                                                 |
| 52927164 | PG(16:1(9Z)/20:4(5Z,8Z,11Z,14Z))     | HMDB    | Endo   | 0.350989139        | 1           | Glycerophospholipids       | 0      | 0      | .                                                 |
| 52926490 | PG(16:1(9Z)/22:4(7Z,10Z,13Z,16Z))    | HMDB    | Endo   | 0.605016227        | 1           | Glycerophospholipids       | 0      | 0      | .                                                 |
| 53480608 | PG(16:1(9Z)/22:5(4Z,7Z,10Z,13Z,16Z)) | HMDB    | Endo   | 0.918971655        | 1           | Glycerophospholipids       | 0      | 0      | .                                                 |
| 52927152 | PG(18:0/16:1(9Z))                    | HMDB    | Endo   | 0.603988573        | 1           | Glycerophospholipids       | 0      | 0      | .                                                 |

| PC_CID   | Chemical                                     | Dataset | Source | Concentration (µM) | No. studies | Class                | PubMed | Biosys | CAS |
|----------|----------------------------------------------|---------|--------|--------------------|-------------|----------------------|--------|--------|-----|
| 53480610 | PG(18:0/18:1(11Z))                           | HMDB    | Endo   | 1.589945915        | 1           | Glycerophospholipids | 0      | 0      | .   |
| 52927245 | PG(18:0/18:2(9Z,12Z))                        | HMDB    | Endo   | 0.193999441        | 1           | Glycerophospholipids | 0      | 0      | .   |
| 52926580 | PG(18:0/18:3(6Z,9Z,12Z))                     | HMDB    | Endo   | 0.338003172        | 1           | Glycerophospholipids | 0      | 0      | .   |
| 24779553 | PG(18:0/20:4(5Z,8Z,11Z,14Z))                 | HMDB    | Endo   | 0.190996534        | 1           | Glycerophospholipids | 0      | 0      | .   |
| 52927148 | PG(18:0/22:4(7Z,10Z,13Z,16Z))                | HMDB    | Endo   | 0.323000955        | 1           | Glycerophospholipids | 0      | 0      | .   |
| 53480612 | PG(18:0/22:5(4Z,7Z,10Z,13Z,16Z))             | HMDB    | Endo   | 0.158992221        | 1           | Glycerophospholipids | 0      | 0      | .   |
| 24779554 | PG(18:0/22:6(4Z,7Z,10Z,13Z,16Z,19Z))         | HMDB    | Endo   | 0.145003123        | 1           | Glycerophospholipids | 0      | 0      | .   |
| 53480614 | PG(18:1(11Z)/16:0)                           | HMDB    | Endo   | 0.603988573        | 1           | Glycerophospholipids | 0      | 0      | .   |
| 53480615 | PG(18:1(11Z)/16:1(9Z))                       | HMDB    | Endo   | 0.080002292        | 1           | Glycerophospholipids | 0      | 0      | .   |
| 53480616 | PG(18:1(11Z)/18:0)                           | HMDB    | Endo   | 1.589945915        | 1           | Glycerophospholipids | 0      | 0      | .   |
| 53480617 | PG(18:1(11Z)/18:1(11Z))                      | HMDB    | Endo   | 0.193999441        | 1           | Glycerophospholipids | 0      | 0      | .   |
| 53480619 | PG(18:1(11Z)/18:2(9Z,12Z))                   | HMDB    | Endo   | 0.338003172        | 1           | Glycerophospholipids | 0      | 0      | .   |
| 53480620 | PG(18:1(11Z)/18:3(6Z,9Z,12Z))                | HMDB    | Endo   | 0.21699087         | 1           | Glycerophospholipids | 0      | 0      | .   |
| 53480622 | PG(18:1(11Z)/20:3(5Z,8Z,11Z))                | HMDB    | Endo   | 0.190996534        | 1           | Glycerophospholipids | 0      | 0      | .   |
| 53480624 | PG(18:1(11Z)/20:4(5Z,8Z,11Z,14Z))            | HMDB    | Endo   | 0.605016227        | 1           | Glycerophospholipids | 0      | 0      | .   |
| 53480625 | PG(18:1(11Z)/22:4(7Z,10Z,13Z,16Z))           | HMDB    | Endo   | 0.158992221        | 1           | Glycerophospholipids | 0      | 0      | .   |
| 53480626 | PG(18:1(11Z)/22:5(4Z,7Z,10Z,13Z,16Z))        | HMDB    | Endo   | 0.145003123        | 1           | Glycerophospholipids | 0      | 0      | .   |
| 53480628 | PG(18:1(11Z)/22:6(4Z,7Z,10Z,13Z,16Z,19Z))    | HMDB    | Endo   | 0.180992443        | 1           | Glycerophospholipids | 0      | 0      | .   |
| 52927146 | PG(18:1(9Z)/16:1(9Z))                        | HMDB    | Endo   | 0.080002292        | 1           | Glycerophospholipids | 0      | 0      | .   |
| 52927224 | PG(18:1(9Z)/18:0)                            | HMDB    | Endo   | 1.589945915        | 1           | Glycerophospholipids | 0      | 0      | .   |
| 52927142 | PG(18:2(9Z,12Z)/16:0)                        | HMDB    | Endo   | 0.080002292        | 1           | Glycerophospholipids | 0      | 0      | .   |
| 52927141 | PG(18:2(9Z,12Z)/18:0)                        | HMDB    | Endo   | 0.193999441        | 1           | Glycerophospholipids | 0      | 0      | .   |
| 53480633 | PG(18:2(9Z,12Z)/18:1(11Z))                   | HMDB    | Endo   | 0.338003172        | 1           | Glycerophospholipids | 0      | 0      | .   |
| 52927219 | PG(18:2(9Z,12Z)/18:2(9Z,12Z))                | HMDB    | Endo   | 0.21699087         | 1           | Glycerophospholipids | 0      | 0      | .   |
| 52926616 | PG(18:2(9Z,12Z)/18:3(6Z,9Z,12Z))             | HMDB    | Endo   | 0.350989139        | 1           | Glycerophospholipids | 0      | 0      | .   |
| 53480634 | PG(18:2(9Z,12Z)/20:3(5Z,8Z,11Z))             | HMDB    | Endo   | 0.605016227        | 1           | Glycerophospholipids | 0      | 0      | .   |
| 52927140 | PG(18:2(9Z,12Z)/20:4(5Z,8Z,11Z,14Z))         | HMDB    | Endo   | 0.918971655        | 1           | Glycerophospholipids | 0      | 0      | .   |
| 52926630 | PG(18:2(9Z,12Z)/22:4(7Z,10Z,13Z,16Z))        | HMDB    | Endo   | 0.145003123        | 1           | Glycerophospholipids | 0      | 0      | .   |
| 53480635 | PG(18:2(9Z,12Z)/22:5(4Z,7Z,10Z,13Z,16Z))     | HMDB    | Endo   | 0.180992443        | 1           | Glycerophospholipids | 0      | 0      | .   |
| 52926310 | PG(18:2(9Z,12Z)/22:6(4Z,7Z,10Z,13Z,16Z,19Z)) | HMDB    | Endo   | 0.104999468        | 1           | Glycerophospholipids | 0      | 0      | .   |
| 52926642 | PG(18:3(6Z,9Z,12Z)/18:0)                     | HMDB    | Endo   | 0.338003172        | 1           | Glycerophospholipids | 0      | 0      | .   |



| PC_CID   | Chemical                                    | Dataset | Source | Concentration (µM) | No. studies | Class                                 | PubMed | Biosys | CAS                                                                                              |
|----------|---------------------------------------------|---------|--------|--------------------|-------------|---------------------------------------|--------|--------|--------------------------------------------------------------------------------------------------|
| 53480637 | PG(18:3(6Z,9Z,12Z)/18:1(11Z))               | HMDB    | Endo   | 0.21699087         | 1           | Glycerophospholipids                  | 0      | 0      | .                                                                                                |
| 52926644 | PG(18:3(6Z,9Z,12Z)/18:2(9Z,12Z))            | HMDB    | Endo   | 0.350989139        | 1           | Glycerophospholipids                  | 0      | 0      | .                                                                                                |
| 53480638 | PG(18:3(6Z,9Z,12Z)/20:3(5Z,8Z,11Z))         | HMDB    | Endo   | 0.918971655        | 1           | Glycerophospholipids                  | 0      | 0      | .                                                                                                |
| 52926660 | PG(18:3(6Z,9Z,12Z)/22:4(7Z,10Z,13Z,16Z))    | HMDB    | Endo   | 0.180992443        | 1           | Glycerophospholipids                  | 0      | 0      | .                                                                                                |
| 53480639 | PG(18:3(6Z,9Z,12Z)/22:5(4Z,7Z,10Z,13Z,16Z)) | HMDB    | Endo   | 0.104999468        | 1           | Glycerophospholipids                  | 0      | 0      | .                                                                                                |
| 71434303 | PGD2 ethanolamide                           | HMDB    | Endo   | 0.160992097        | 1           | Fatty Amides                          | 0      | 0      | 398138-28-8                                                                                      |
| 53481911 | PGF2a ethanolamide                          | HMDB    | Endo   | 0.017300844        | 1           | Fatty Amides                          | 0      | 0      | .                                                                                                |
| 996      | Phenol                                      | HMDB    | Endo   | 0.860019685        | 1           | Phenols and Derivatives               | 0      | 11     | 108-95-2,100790-31-6,14534-23-7,27073-41-2,50356-25-7,61788-41-8,63496-48-0,73607-76-8,8002-07-1 |
| 999      | Phenylacetic acid                           | HMDB    | Endo   | 54.21729752        | 8           | Phenylacetic Acid Derivatives         | 1      | 2      | 103-82-2,51146-16-8                                                                              |
| 6041     | Phenylephrine                               | HMDB    | Drug   | 2.299979017        | 1           | Phenethylamines                       | 13     | 0      | 59-42-7,1416-03-1                                                                                |
| 10297    | Phenylpropanolamine                         | HMDB    | Drug   | 1.999905641        | 1           | Phenethylamines                       | 0      | 2      | 492-41-1                                                                                         |
| 997      | Phenylpyruvic acid                          | HMDB    | Endo   | 0.500023591        | 1           | Benzyl Alcohols and Derivatives       | 0      | 5      | 156-06-9                                                                                         |
| 1061     | Phosphate                                   | HMDB    | Endo   | 379.0999915        | 1           | Non-metal Oxoanionic Compounds        | 0      | 343    | 14265-44-2,264888-19-9                                                                           |
| 1005     | Phosphoenolpyruvic acid                     | HMDB    | Endo   | 17.40051842        | 1           | Organic Oxoanionic Compounds          | 0      | 13     | 138-08-9                                                                                         |
| 7339     | Phosphoribosyl pyrophosphate                | HMDB    | Endo   | 4.899827498        | 1           | Monosaccharides                       | 0      | 24     | 7540-64-9,13270-65-0,13860-42-9,29321-99-1,62726-16-3,97-55-2                                    |
| 1004     | Phosphoric acid                             | HMDB    | Endo   | 949.9411165        | 2           | Non-metal Oxoanionic Compounds        | 0      | 5      | 7664-38-2,1339-32-8,178560-73-1,28602-75-7,68891-72-5,71751-05-8,8017-16-1,9044-08-0             |
| 24404    | Phosphorus                                  | HMDB    | Food   | 2358.308727        | 3           | Homogeneous Other Non-metal Compounds | 78     | 0      | 7723-14-0,7803-51-2,51457-48-8,13769-19-2,167076-44-0,29879-37-6                                 |
| 1014     | Phosphorylcholine                           | HMDB    | Endo   | 2.200093809        | 1           | Alcohols and Polyols                  | 9      | 13     | 3616-04-4                                                                                        |
| 68841    | Phosphoserine                               | HMDB    | Endo   | 16.99977315        | 1           | Amino Acids and Derivatives           | 0      | 11     | 407-41-0                                                                                         |
| 127      | p-Hydroxyphenylacetic acid                  | HMDB    | Food   | 5.580620662        | 9           | Phenols and Derivatives               | 0      | 2      | 156-38-7                                                                                         |
| 26840    | Phytanic acid                               | HMDB    | Endo   | 3.599878158        | 2           | Prenol Lipids                         | 2      | 4      | 14721-66-5,18654-64-3                                                                            |
| 9963391  | Phytoene                                    | HMDB    | Endo   | 0.130002708        | 1           | Prenol Lipids                         | 0      | 1      | 13920-14-4                                                                                       |
| 6436722  | Phytofluene                                 | HMDB    | Food   | 0.193398974        | 3           | Prenol Lipids                         | 0      | 1      | 540-05-6                                                                                         |

| PC_CID   | Chemical                             | Dataset | Source | Concentration (µM) | No. studies | Class                | PubMed | Biosys | CAS |
|----------|--------------------------------------|---------|--------|--------------------|-------------|----------------------|--------|--------|-----|
| 52928334 | PI(16:0/16:1(9Z))                    | HMDB    | Endo   | 0.746022141        | 1           | Glycerophospholipids | 0      | 0      | .   |
| 71296229 | PI(16:0/18:0)                        | HMDB    | Endo   | 0.472981029        | 1           | Glycerophospholipids | 0      | 0      | .   |
| 53480051 | PI(16:0/18:1(11Z))                   | HMDB    | Endo   | 1.779976212        | 1           | Glycerophospholipids | 0      | 0      | .   |
| 46891796 | PI(16:0/18:2(9Z,12Z))                | HMDB    | Endo   | 2.640055659        | 1           | Glycerophospholipids | 0      | 0      | .   |
| 52928395 | PI(16:0/20:0)                        | HMDB    | Endo   | 0.269011809        | 1           | Glycerophospholipids | 0      | 0      | .   |
| 52927618 | PI(16:0/20:2(11Z,14Z))               | HMDB    | Endo   | 4.290056916        | 1           | Glycerophospholipids | 0      | 0      | .   |
| 53480052 | PI(16:0/20:3(5Z,8Z,11Z))             | HMDB    | Endo   | 1.169995614        | 1           | Glycerophospholipids | 0      | 0      | .   |
| 52928411 | PI(16:0/20:4(5Z,8Z,11Z,14Z))         | HMDB    | Endo   | 1.269978537        | 1           | Glycerophospholipids | 0      | 0      | .   |
| 52927621 | PI(16:0/22:2(13Z,16Z))               | HMDB    | Endo   | 0.189001562        | 1           | Glycerophospholipids | 0      | 0      | .   |
| 53480054 | PI(16:0/22:3(10Z,13Z,16Z))           | HMDB    | Endo   | 1.829970781        | 1           | Glycerophospholipids | 0      | 0      | .   |
| 53480055 | PI(16:0/22:4(10Z,13Z,16Z,19Z))       | HMDB    | Endo   | 11.000052          | 1           | Glycerophospholipids | 0      | 0      | .   |
| 53480056 | PI(16:0/22:5(4Z,7Z,10Z,13Z,16Z))     | HMDB    | Endo   | 1.280051101        | 1           | Glycerophospholipids | 0      | 0      | .   |
| 52927628 | PI(16:1(9Z)/16:0)                    | HMDB    | Endo   | 0.746022141        | 1           | Glycerophospholipids | 0      | 0      | .   |
| 52927632 | PI(16:1(9Z)/18:0)                    | HMDB    | Endo   | 1.779976212        | 1           | Glycerophospholipids | 0      | 0      | .   |
| 53480058 | PI(16:1(9Z)/18:1(11Z))               | HMDB    | Endo   | 2.640055659        | 1           | Glycerophospholipids | 0      | 0      | .   |
| 53480060 | PI(16:2(9Z,12Z)/18:0)                | HMDB    | Endo   | 2.640055659        | 1           | Glycerophospholipids | 0      | 0      | .   |
| 53480061 | PI(16:2(9Z,12Z)/22:3(10Z,13Z,16Z))   | HMDB    | Endo   | 1.280051101        | 1           | Glycerophospholipids | 0      | 0      | .   |
| 52928311 | PI(18:0/16:0)                        | HMDB    | Endo   | 0.472981029        | 1           | Glycerophospholipids | 0      | 0      | .   |
| 52928310 | PI(18:0/16:1(9Z))                    | HMDB    | Endo   | 1.779976212        | 1           | Glycerophospholipids | 0      | 0      | .   |
| 53480062 | PI(18:0/16:2(9Z,12Z))                | HMDB    | Endo   | 2.640055659        | 1           | Glycerophospholipids | 0      | 0      | .   |
| 42607490 | PI(18:0/18:0)                        | HMDB    | Endo   | 0.269011809        | 1           | Glycerophospholipids | 0      | 0      | .   |
| 52928409 | PI(18:0/18:2(9Z,12Z))                | HMDB    | Endo   | 4.290056916        | 1           | Glycerophospholipids | 0      | 0      | .   |
| 52927736 | PI(18:0/18:3(6Z,9Z,12Z))             | HMDB    | Endo   | 1.169995614        | 1           | Glycerophospholipids | 0      | 0      | .   |
| 52928387 | PI(18:0/20:2(11Z,14Z))               | HMDB    | Endo   | 0.189001562        | 1           | Glycerophospholipids | 0      | 0      | .   |
| 53480063 | PI(18:0/20:3(5Z,8Z,11Z))             | HMDB    | Endo   | 1.829970781        | 1           | Glycerophospholipids | 0      | 0      | .   |
| 42607491 | PI(18:0/20:4(5Z,8Z,11Z,14Z))         | HMDB    | Endo   | 11.000052          | 1           | Glycerophospholipids | 0      | 0      | .   |
| 53480065 | PI(18:0/22:4(10Z,13Z,16Z,19Z))       | HMDB    | Endo   | 0.450994561        | 1           | Glycerophospholipids | 0      | 0      | .   |
| 53480066 | PI(18:0/22:5(4Z,7Z,10Z,13Z,16Z))     | HMDB    | Endo   | 0.475019226        | 1           | Glycerophospholipids | 0      | 0      | .   |
| 52927465 | PI(18:0/22:6(4Z,7Z,10Z,13Z,16Z,19Z)) | HMDB    | Endo   | 0.539992515        | 1           | Glycerophospholipids | 0      | 0      | .   |
| 53480068 | PI(18:1(11Z)/16:0)                   | HMDB    | Endo   | 1.779976212        | 1           | Glycerophospholipids | 0      | 0      | .   |
| 53480069 | PI(18:1(11Z)/16:1(9Z))               | HMDB    | Endo   | 2.640055659        | 1           | Glycerophospholipids | 0      | 0      | .   |

| PC_CID   | Chemical                              | Dataset | Source | Concentration (µM) | No. studies | Class                | PubMed | Biosys | CAS |
|----------|---------------------------------------|---------|--------|--------------------|-------------|----------------------|--------|--------|-----|
| 53480070 | PI(18:1(11Z)/18:1(11Z))               | HMDB    | Endo   | 4.290056916        | 1           | Glycerophospholipids | 0      | 0      | .   |
| 53480072 | PI(18:1(11Z)/18:2(9Z,12Z))            | HMDB    | Endo   | 1.169995614        | 1           | Glycerophospholipids | 0      | 0      | .   |
| 53480073 | PI(18:1(11Z)/18:3(6Z,9Z,12Z))         | HMDB    | Endo   | 1.269978537        | 1           | Glycerophospholipids | 0      | 0      | .   |
| 53480075 | PI(18:1(11Z)/20:1(11Z))               | HMDB    | Endo   | 0.189001562        | 1           | Glycerophospholipids | 0      | 0      | .   |
| 53480076 | PI(18:1(11Z)/20:3(5Z,8Z,11Z))         | HMDB    | Endo   | 11.000052          | 1           | Glycerophospholipids | 0      | 0      | .   |
| 53480078 | PI(18:1(11Z)/20:4(5Z,8Z,11Z,14Z))     | HMDB    | Endo   | 1.280051101        | 1           | Glycerophospholipids | 0      | 0      | .   |
| 52928300 | PI(18:2(9Z,12Z)/16:0)                 | HMDB    | Endo   | 2.640055659        | 1           | Glycerophospholipids | 0      | 0      | .   |
| 52928299 | PI(18:2(9Z,12Z)/18:0)                 | HMDB    | Endo   | 4.290056916        | 1           | Glycerophospholipids | 0      | 0      | .   |
| 53480083 | PI(18:2(9Z,12Z)/18:1(11Z))            | HMDB    | Endo   | 1.169995614        | 1           | Glycerophospholipids | 0      | 0      | .   |
| 52928380 | PI(18:2(9Z,12Z)/18:2(9Z,12Z))         | HMDB    | Endo   | 1.269978537        | 1           | Glycerophospholipids | 0      | 0      | .   |
| 52927777 | PI(18:2(9Z,12Z)/20:0)                 | HMDB    | Endo   | 0.189001562        | 1           | Glycerophospholipids | 0      | 0      | .   |
| 52927778 | PI(18:2(9Z,12Z)/20:1(11Z))            | HMDB    | Endo   | 1.829970781        | 1           | Glycerophospholipids | 0      | 0      | .   |
| 52927779 | PI(18:2(9Z,12Z)/20:2(11Z,14Z))        | HMDB    | Endo   | 11.000052          | 1           | Glycerophospholipids | 0      | 0      | .   |
| 53480084 | PI(18:2(9Z,12Z)/20:3(5Z,8Z,11Z))      | HMDB    | Endo   | 1.280051101        | 1           | Glycerophospholipids | 0      | 0      | .   |
| 52927785 | PI(18:2(9Z,12Z)/22:2(13Z,16Z))        | HMDB    | Endo   | 0.450994561        | 1           | Glycerophospholipids | 0      | 0      | .   |
| 53480085 | PI(18:2(9Z,12Z)/22:3(10Z,13Z,16Z))    | HMDB    | Endo   | 0.475019226        | 1           | Glycerophospholipids | 0      | 0      | .   |
| 52927798 | PI(18:3(6Z,9Z,12Z)/18:0)              | HMDB    | Endo   | 1.169995614        | 1           | Glycerophospholipids | 0      | 0      | .   |
| 53480086 | PI(18:3(6Z,9Z,12Z)/18:1(11Z))         | HMDB    | Endo   | 1.269978537        | 1           | Glycerophospholipids | 0      | 0      | .   |
| 53480087 | PI(18:3(6Z,9Z,12Z)/22:3(10Z,13Z,16Z)) | HMDB    | Endo   | 0.539992515        | 1           | Glycerophospholipids | 0      | 0      | .   |
| 52928286 | PI(20:0/16:0)                         | HMDB    | Endo   | 0.269011809        | 1           | Glycerophospholipids | 0      | 0      | .   |
| 52928375 | PI(20:0/18:2(9Z,12Z))                 | HMDB    | Endo   | 0.189001562        | 1           | Glycerophospholipids | 0      | 0      | .   |
| 52927943 | PI(20:0/20:3(8Z,11Z,14Z))             | HMDB    | Endo   | 0.21699087         | 1           | Glycerophospholipids | 0      | 0      | .   |
| 52928284 | PI(20:0/20:4(5Z,8Z,11Z,14Z))          | HMDB    | Endo   | 0.450994561        | 1           | Glycerophospholipids | 0      | 0      | .   |
| 53480091 | PI(20:1(11Z)/18:1(11Z))               | HMDB    | Endo   | 0.189001562        | 1           | Glycerophospholipids | 0      | 0      | .   |
| 52927962 | PI(20:1(11Z)/18:2(9Z,12Z))            | HMDB    | Endo   | 1.829970781        | 1           | Glycerophospholipids | 0      | 0      | .   |
| 52927971 | PI(20:1(11Z)/20:4(5Z,8Z,11Z,14Z))     | HMDB    | Endo   | 0.475019226        | 1           | Glycerophospholipids | 0      | 0      | .   |
| 52927985 | PI(20:2(11Z,14Z)/16:0)                | HMDB    | Endo   | 4.290056916        | 1           | Glycerophospholipids | 0      | 0      | .   |
| 52927990 | PI(20:2(11Z,14Z)/18:0)                | HMDB    | Endo   | 0.189001562        | 1           | Glycerophospholipids | 0      | 0      | .   |
| 52927992 | PI(20:2(11Z,14Z)/18:2(9Z,12Z))        | HMDB    | Endo   | 11.000052          | 1           | Glycerophospholipids | 0      | 0      | .   |
| 52928000 | PI(20:2(11Z,14Z)/20:2(11Z,14Z))       | HMDB    | Endo   | 0.450994561        | 1           | Glycerophospholipids | 0      | 0      | .   |
| 53480093 | PI(20:3(5Z,8Z,11Z)/16:0)              | HMDB    | Endo   | 1.169995614        | 1           | Glycerophospholipids | 0      | 0      | .   |

| PC_CID   | Chemical                              | Dataset | Source | Concentration (µM) | No. studies | Class                              | PubMed | Biosys | CAS                           |
|----------|---------------------------------------|---------|--------|--------------------|-------------|------------------------------------|--------|--------|-------------------------------|
| 53480094 | PI(20:3(5Z,8Z,11Z)/18:0)              | HMDB    | Endo   | 1.829970781        | 1           | Glycerophospholipids               | 0      | 0      | .                             |
| 53480095 | PI(20:3(5Z,8Z,11Z)/18:1(11Z))         | HMDB    | Endo   | 11.000052          | 1           | Glycerophospholipids               | 0      | 0      | .                             |
| 53480097 | PI(20:3(5Z,8Z,11Z)/18:2(9Z,12Z))      | HMDB    | Endo   | 1.280051101        | 1           | Glycerophospholipids               | 0      | 0      | .                             |
| 53480098 | PI(20:3(5Z,8Z,11Z)/20:3(5Z,8Z,11Z))   | HMDB    | Endo   | 0.539992515        | 1           | Glycerophospholipids               | 0      | 0      | .                             |
| 52928281 | PI(20:4(5Z,8Z,11Z,14Z)/16:0)          | HMDB    | Endo   | 1.269978537        | 1           | Glycerophospholipids               | 0      | 0      | .                             |
| 52928051 | PI(20:4(5Z,8Z,11Z,14Z)/18:0)          | HMDB    | Endo   | 11.000052          | 1           | Glycerophospholipids               | 0      | 0      | .                             |
| 53480102 | PI(20:4(5Z,8Z,11Z,14Z)/18:1(11Z))     | HMDB    | Endo   | 1.280051101        | 1           | Glycerophospholipids               | 0      | 0      | .                             |
| 52928059 | PI(20:4(5Z,8Z,11Z,14Z)/20:0)          | HMDB    | Endo   | 0.450994561        | 1           | Glycerophospholipids               | 0      | 0      | .                             |
| 52928060 | PI(20:4(5Z,8Z,11Z,14Z)/20:1(11Z))     | HMDB    | Endo   | 0.475019226        | 1           | Glycerophospholipids               | 0      | 0      | .                             |
| 52928184 | PI(22:2(13Z,16Z)/16:0)                | HMDB    | Endo   | 0.189001562        | 1           | Glycerophospholipids               | 0      | 0      | .                             |
| 52928191 | PI(22:2(13Z,16Z)/18:2(9Z,12Z))        | HMDB    | Endo   | 0.450994561        | 1           | Glycerophospholipids               | 0      | 0      | .                             |
| 53480109 | PI(22:3(10Z,13Z,16Z)/16:0)            | HMDB    | Endo   | 1.829970781        | 1           | Glycerophospholipids               | 0      | 0      | .                             |
| 53480110 | PI(22:3(10Z,13Z,16Z)/16:2(9Z,12Z))    | HMDB    | Endo   | 1.280051101        | 1           | Glycerophospholipids               | 0      | 0      | .                             |
| 53480111 | PI(22:3(10Z,13Z,16Z)/18:2(9Z,12Z))    | HMDB    | Endo   | 0.475019226        | 1           | Glycerophospholipids               | 0      | 0      | .                             |
| 53480112 | PI(22:3(10Z,13Z,16Z)/18:3(6Z,9Z,12Z)) | HMDB    | Endo   | 0.539992515        | 1           | Glycerophospholipids               | 0      | 0      | .                             |
| 53480114 | PI(22:4(10Z,13Z,16Z,19Z)/16:0)        | HMDB    | Endo   | 11.000052          | 1           | Glycerophospholipids               | 0      | 0      | .                             |
| 53480115 | PI(22:4(10Z,13Z,16Z,19Z)/18:0)        | HMDB    | Endo   | 0.450994561        | 1           | Glycerophospholipids               | 0      | 0      | .                             |
| 53480116 | PI(22:5(4Z,7Z,10Z,13Z,16Z)/16:0)      | HMDB    | Endo   | 1.280051101        | 1           | Glycerophospholipids               | 0      | 0      | .                             |
| 53480117 | PI(22:5(4Z,7Z,10Z,13Z,16Z)/18:0)      | HMDB    | Endo   | 0.475019226        | 1           | Glycerophospholipids               | 0      | 0      | .                             |
| 52928249 | PI(22:6(4Z,7Z,10Z,13Z,16Z,19Z)/18:0)  | HMDB    | Endo   | 0.539992515        | 1           | Glycerophospholipids               | 0      | 0      | .                             |
| 1018     | Picolinic acid                        | HMDB    | Endo   | 0.2990035          | 1           | Amino Acids and Derivatives        | 1      | 0      | 98-98-6,32075-31-3,88161-53-9 |
| 6451814  | Pi-Methylimidazoleacetic acid         | HMDB    | Endo   | 0.072999696        | 1           | Azoles                             | 0      | 0      | 4200-48-0                     |
| 439227   | Pipecolic acid                        | HMDB    | Food   | 1.718067306        | 2           | Amino Acids and Derivatives        | 0      | 2      | 3105-95-1                     |
| 440266   | p-Octopamine                          | HMDB    | Endo   | 0.001396481        | 2           | Phenethylamines                    | 0      | 1      | 104-14-3                      |
| 1021     | Porphobilinogen                       | HMDB    | Endo   | 0.060000643        | 1           | Carboxylic Acids and Derivatives   | 0      | 6      | 487-90-1                      |
| 813      | Potassium                             | HMDB    | Food   | 4149.736014        | 2           | Homogeneous Alkali Metal Compounds | 0      | 90     | 24203-36-9                    |
| 8955     | Pregnenolone                          | HMDB    | Endo   | 0.004601836        | 12          | Steroids and Steroid Derivatives   | 0      | 22     | 145-13-1,116907-59-6          |
| 105074   | Pregnenolone sulfate                  | HMDB    | Endo   | 0.130002708        | 1           | Steroids and Steroid Derivatives   | 0      | 5      | 1247-64-9                     |

| PC_CID  | Chemical            | Dataset | Source | Concentration (µM) | No. studies | Class                            | PubMed | Biosys | CAS                                                                                                                                                                                                                             |
|---------|---------------------|---------|--------|--------------------|-------------|----------------------------------|--------|--------|---------------------------------------------------------------------------------------------------------------------------------------------------------------------------------------------------------------------------------|
| 5994    | Progesterone        | HMDB    | Endo   | 0.003416632        | 5           | Steroids and Steroid Derivatives | 76     | 27     | 57-83-0,257630-50-5,753497-20-0,8012-32-6,8023-13-0                                                                                                                                                                             |
| 115244  | Proline betaine     | HMDB    | Food   | 10.00014907        | 1           | Pyrrolidines                     | 0      | 0      | 471-87-4                                                                                                                                                                                                                        |
| 1032    | Propionic acid      | HMDB    | Food   | 0.899964465        | 1           | Carboxylic Acids and Derivatives | 0      | 17     | 79-09-4,68937-68-8,3349-08-4,68990-37-4,784139-72-6                                                                                                                                                                             |
| 107738  | Propionylcarnitine  | HMDB    | Endo   | 0.352149316        | 2           | Fatty Acid Esters                | 1      | 4      | 17298-37-2,25518-45-0                                                                                                                                                                                                           |
| 1031    | Propyl alcohol      | HMDB    | Endo   | 0.329987666        | 1           | Alcohols and Polyols             | 3      | 1      | 71-23-8,4712-36-1,142583-61-7,62309-51-7                                                                                                                                                                                        |
| 1030    | Propylene glycol    | HMDB    | Food   | 6.678544002        | 2           | Alcohols and Polyols             | 0      | 2      | 57-55-6,190913-75-8,4254-16-4                                                                                                                                                                                                   |
| 5281912 | Prostaglandin A1    | HMDB    | Endo   | 7.40034E-05        | 1           | Eicosanoids                      | 0      | 0      | 14152-28-4                                                                                                                                                                                                                      |
| 5280880 | Prostaglandin A2    | HMDB    | Endo   | 0.000419688        | 7           | Eicosanoids                      | 0      | 7      | 13345-50-1                                                                                                                                                                                                                      |
| 5280881 | Prostaglandin B2    | HMDB    | Endo   | 0.01391344         | 2           | Eicosanoids                      | 0      | 7      | 13367-85-6                                                                                                                                                                                                                      |
| 5280936 | Prostaglandin D1    | HMDB    | Endo   | 1.00003E-05        | 1           | Eicosanoids                      | 0      | 0      | 17968-82-0                                                                                                                                                                                                                      |
| 448457  | Prostaglandin D2    | HMDB    | Endo   | 0.001644038        | 3           | Eicosanoids                      | 3      | 24     | 41598-07-6                                                                                                                                                                                                                      |
| 5282260 | Prostaglandin D3    | HMDB    | Endo   | 0.000123003        | 1           | Eicosanoids                      | 0      | 0      | 71902-47-1                                                                                                                                                                                                                      |
| 5280723 | Prostaglandin E1    | HMDB    | Endo   | 3.69992E-06        | 1           | Eicosanoids                      | 11     | 6      | 745-65-3,119314-69-1,22299-37-2,50-83-9,50865-30-0                                                                                                                                                                              |
| 5280360 | Prostaglandin E2    | HMDB    | Endo   | 0.003263353        | 6           | Eicosanoids                      | 17     | 29     | 363-24-6                                                                                                                                                                                                                        |
| 5280939 | Prostaglandin F1a   | HMDB    | Endo   | 0.000376008        | 1           | Eicosanoids                      | 1      | 0      | 745-62-0                                                                                                                                                                                                                        |
| 5280363 | Prostaglandin F2a   | HMDB    | Endo   | 0.006333514        | 4           | Eicosanoids                      | 46     | 23     | 551-11-1,13535-33-6,99437-94-2                                                                                                                                                                                                  |
| 5280884 | Prostaglandin J2    | HMDB    | Endo   | 4.4089E-05         | 2           | Eicosanoids                      | 0      | 7      | 60203-57-8                                                                                                                                                                                                                      |
| 72      | Protocatechuic acid | HMDB    | Food   | 0.304921778        | 9           | Benzoic Acid and Derivatives     | 0      | 6      | 99-50-3                                                                                                                                                                                                                         |
| 4971    | Protoporphyrin IX   | HMDB    | Endo   | 0.591437065        | 2           | Tetrapyrroles and Derivatives    | 1      | 6      | 553-12-8,50865-01-5,1818-68-4,227475-00-5,263148-77-2,37188-04-8,392312-74-2,42183-71-1,50312-31-7,562103-89-3,61320-51-2,63872-77-5,673437-82-6,68034-48-0,720672-66-2,75440-82-3,75460-41-2,75599-49-4,75750-98-0,942418-20-4 |

| PC_CID   | Chemical                             | Dataset | Source | Concentration (µM) | No. studies | Class                | PubMed | Biosys | CAS         |
|----------|--------------------------------------|---------|--------|--------------------|-------------|----------------------|--------|--------|-------------|
| 52926083 | PS(14:0/18:1(9Z))                    | HMDB    | Endo   | 0.238998023        | 1           | Glycerophospholipids | 0      | 0      | .           |
| 52925229 | PS(14:1(9Z)/18:0)                    | HMDB    | Endo   | 0.238998023        | 1           | Glycerophospholipids | 0      | 0      | .           |
| 52926017 | PS(16:0/16:1(9Z))                    | HMDB    | Endo   | 0.238998023        | 1           | Glycerophospholipids | 0      | 0      | .           |
| 52926014 | PS(16:0/18:0)                        | HMDB    | Endo   | 0.307002312        | 1           | Glycerophospholipids | 0      | 0      | .           |
| 5283499  | PS(16:0/18:1(9Z))                    | HMDB    | Endo   | 0.186001601        | 1           | Glycerophospholipids | 0      | 0      | 40290-44-6  |
| 46891801 | PS(16:0/18:2(9Z,12Z))                | HMDB    | Endo   | 0.150996292        | 1           | Glycerophospholipids | 0      | 0      | 383908-63-2 |
| 52926011 | PS(16:0/20:3(8Z,11Z,14Z))            | HMDB    | Endo   | 0.122996424        | 1           | Glycerophospholipids | 0      | 0      | .           |
| 24779544 | PS(16:0/20:4(5Z,8Z,11Z,14Z))         | HMDB    | Endo   | 0.178994536        | 1           | Glycerophospholipids | 0      | 0      | .           |
| 46891804 | PS(16:0/22:6(4Z,7Z,10Z,13Z,16Z,19Z)) | HMDB    | Endo   | 0.161993349        | 1           | Glycerophospholipids | 0      | 0      | 474943-17-4 |
| 52925317 | PS(16:1(9Z)/16:0)                    | HMDB    | Endo   | 0.238998023        | 1           | Glycerophospholipids | 0      | 0      | .           |
| 52925321 | PS(16:1(9Z)/18:0)                    | HMDB    | Endo   | 0.186001601        | 1           | Glycerophospholipids | 0      | 0      | .           |
| 52926009 | PS(16:1(9Z)/18:1(9Z))                | HMDB    | Endo   | 0.150996292        | 1           | Glycerophospholipids | 0      | 0      | .           |
| 52925329 | PS(16:1(9Z)/20:3(8Z,11Z,14Z))        | HMDB    | Endo   | 0.178994536        | 1           | Glycerophospholipids | 0      | 0      | .           |
| 52925419 | PS(18:0/14:1(9Z))                    | HMDB    | Endo   | 0.238998023        | 1           | Glycerophospholipids | 0      | 0      | .           |
| 52925997 | PS(18:0/16:0)                        | HMDB    | Endo   | 0.307002312        | 1           | Glycerophospholipids | 0      | 0      | .           |
| 52925996 | PS(18:0/16:1(9Z))                    | HMDB    | Endo   | 0.186001601        | 1           | Glycerophospholipids | 0      | 0      | .           |
| 46891784 | PS(18:0/18:0)                        | HMDB    | Endo   | 2.090075103        | 1           | Glycerophospholipids | 0      | 0      | 321595-13-5 |
| 59720717 | PS(18:0/18:1(9Z))                    | HMDB    | Endo   | 0.73300702         | 1           | Glycerophospholipids | 0      | .      | 321883-23-2 |
| 9547091  | PS(18:0/18:2(9Z,12Z))                | HMDB    | Endo   | 0.316004129        | 1           | Glycerophospholipids | 0      | 0      | .           |
| 52925426 | PS(18:0/18:3(9Z,12Z,15Z))            | HMDB    | Endo   | 0.122996424        | 1           | Glycerophospholipids | 0      | 0      | .           |
| 52925994 | PS(18:0/20:3(8Z,11Z,14Z))            | HMDB    | Endo   | 0.193999441        | 1           | Glycerophospholipids | 0      | 0      | .           |
| 46891807 | PS(18:0/20:4(5Z,8Z,11Z,14Z))         | HMDB    | Endo   | 0.480994232        | 1           | Glycerophospholipids | 0      | 0      | .           |
| 53480355 | PS(18:0/22:5(7Z,10Z,13Z,16Z,19Z))    | HMDB    | Endo   | 0.113995079        | 1           | Glycerophospholipids | 0      | 0      | .           |
| 46891808 | PS(18:0/22:6(4Z,7Z,10Z,13Z,16Z,19Z)) | HMDB    | Endo   | 0.636990842        | 1           | Glycerophospholipids | 0      | 0      | .           |
| 52925991 | PS(18:1(9Z)/14:0)                    | HMDB    | Endo   | 0.238998023        | 1           | Glycerophospholipids | 0      | 0      | .           |
| 52926066 | PS(18:1(9Z)/16:0)                    | HMDB    | Endo   | 0.186001601        | 1           | Glycerophospholipids | 0      | 0      | .           |
| 52925990 | PS(18:1(9Z)/16:1(9Z))                | HMDB    | Endo   | 0.150996292        | 1           | Glycerophospholipids | 0      | 0      | .           |
| 9547094  | PS(18:1(9Z)/18:0)                    | HMDB    | Endo   | 0.73300702         | 1           | Glycerophospholipids | 0      | 0      | .           |
| 23692652 | PS(18:1(9Z)/18:1(9Z))                | HMDB    | Endo   | 0.316004129        | 1           | Glycerophospholipids | 0      | .      | 70614-14-1  |
| 52926065 | PS(18:1(9Z)/18:2(9Z,12Z))            | HMDB    | Endo   | 0.122996424        | 1           | Glycerophospholipids | 0      | 0      | .           |
| 52925989 | PS(18:1(9Z)/18:3(9Z,12Z,15Z))        | HMDB    | Endo   | 0.178994536        | 1           | Glycerophospholipids | 0      | 0      | .           |

| PC_CID   | Chemical                                 | Dataset | Source | Concentration (µM) | No. studies | Class                | PubMed | Biosys | CAS       |
|----------|------------------------------------------|---------|--------|--------------------|-------------|----------------------|--------|--------|-----------|
| 52925445 | PS(18:1(9Z)/20:3(8Z,11Z,14Z))            | HMDB    | Endo   | 0.480994232        | 1           | Glycerophospholipids | 0      | 0      | .         |
| 52925988 | PS(18:1(9Z)/20:4(5Z,8Z,11Z,14Z))         | HMDB    | Endo   | 0.281000171        | 1           | Glycerophospholipids | 0      | 0      | .         |
| 52925155 | PS(18:1(9Z)/22:6(4Z,7Z,10Z,13Z,16Z,19Z)) | HMDB    | Endo   | 0.168992659        | 1           | Glycerophospholipids | 0      | 0      | .         |
| 52925986 | PS(18:2(9Z,12Z)/16:0)                    | HMDB    | Endo   | 0.150996292        | 1           | Glycerophospholipids | 0      | 0      | .         |
| 52925985 | PS(18:2(9Z,12Z)/18:0)                    | HMDB    | Endo   | 0.316004129        | 1           | Glycerophospholipids | 0      | 0      | .         |
| 52925460 | PS(18:2(9Z,12Z)/18:1(9Z))                | HMDB    | Endo   | 0.122996424        | 1           | Glycerophospholipids | 0      | 0      | .         |
| 46891793 | PS(18:2(9Z,12Z)/18:2(9Z,12Z))            | HMDB    | Endo   | 0.178994536        | 1           | Glycerophospholipids | 0      | 0      | .         |
| 52925469 | PS(18:2(9Z,12Z)/20:3(8Z,11Z,14Z))        | HMDB    | Endo   | 0.281000171        | 1           | Glycerophospholipids | 0      | 0      | .         |
| 52925984 | PS(18:2(9Z,12Z)/20:4(5Z,8Z,11Z,14Z))     | HMDB    | Endo   | 0.161993349        | 1           | Glycerophospholipids | 0      | 0      | .         |
| 52925517 | PS(18:3(9Z,12Z,15Z)/18:0)                | HMDB    | Endo   | 0.122996424        | 1           | Glycerophospholipids | 0      | 0      | .         |
| 52925983 | PS(18:3(9Z,12Z,15Z)/18:1(9Z))            | HMDB    | Endo   | 0.178994536        | 1           | Glycerophospholipids | 0      | 0      | .         |
| 52925526 | PS(18:3(9Z,12Z,15Z)/20:3(8Z,11Z,14Z))    | HMDB    | Endo   | 0.161993349        | 1           | Glycerophospholipids | 0      | 0      | .         |
| 52925705 | PS(20:3(8Z,11Z,14Z)/16:0)                | HMDB    | Endo   | 0.122996424        | 1           | Glycerophospholipids | 0      | 0      | .         |
| 52925706 | PS(20:3(8Z,11Z,14Z)/16:1(9Z))            | HMDB    | Endo   | 0.178994536        | 1           | Glycerophospholipids | 0      | 0      | .         |
| 52925710 | PS(20:3(8Z,11Z,14Z)/18:0)                | HMDB    | Endo   | 0.193999441        | 1           | Glycerophospholipids | 0      | 0      | .         |
| 52925711 | PS(20:3(8Z,11Z,14Z)/18:1(9Z))            | HMDB    | Endo   | 0.480994232        | 1           | Glycerophospholipids | 0      | 0      | .         |
| 52925712 | PS(20:3(8Z,11Z,14Z)/18:2(9Z,12Z))        | HMDB    | Endo   | 0.281000171        | 1           | Glycerophospholipids | 0      | 0      | .         |
| 52925714 | PS(20:3(8Z,11Z,14Z)/18:3(9Z,12Z,15Z))    | HMDB    | Endo   | 0.161993349        | 1           | Glycerophospholipids | 0      | 0      | .         |
| 52925721 | PS(20:3(8Z,11Z,14Z)/20:3(8Z,11Z,14Z))    | HMDB    | Endo   | 0.636990842        | 1           | Glycerophospholipids | 0      | 0      | .         |
| 52925722 | PS(20:3(8Z,11Z,14Z)/20:4(5Z,8Z,11Z,14Z)) | HMDB    | Endo   | 0.168992659        | 1           | Glycerophospholipids | 0      | 0      | .         |
| 52925968 | PS(20:4(5Z,8Z,11Z,14Z)/16:0)             | HMDB    | Endo   | 0.178994536        | 1           | Glycerophospholipids | 0      | 0      | .         |
| 52925740 | PS(20:4(5Z,8Z,11Z,14Z)/18:0)             | HMDB    | Endo   | 0.480994232        | 1           | Glycerophospholipids | 0      | 0      | .         |
| 52925741 | PS(20:4(5Z,8Z,11Z,14Z)/18:1(9Z))         | HMDB    | Endo   | 0.281000171        | 1           | Glycerophospholipids | 0      | 0      | .         |
| 52925742 | PS(20:4(5Z,8Z,11Z,14Z)/18:2(9Z,12Z))     | HMDB    | Endo   | 0.161993349        | 1           | Glycerophospholipids | 0      | 0      | .         |
| 52925751 | PS(20:4(5Z,8Z,11Z,14Z)/20:3(8Z,11Z,14Z)) | HMDB    | Endo   | 0.168992659        | 1           | Glycerophospholipids | 0      | 0      | .         |
| 52925956 | PS(22:6(4Z,7Z,10Z,13Z,16Z,19Z)/16:0)     | HMDB    | Endo   | 0.161993349        | 1           | Glycerophospholipids | 0      | 0      | .         |
| 52925937 | PS(22:6(4Z,7Z,10Z,13Z,16Z,19Z)/18:0)     | HMDB    | Endo   | 0.636990842        | 1           | Glycerophospholipids | 0      | 0      | .         |
| 52925938 | PS(22:6(4Z,7Z,10Z,13Z,16Z,19Z)/18:1(9Z)) | HMDB    | Endo   | 0.168992659        | 1           | Glycerophospholipids | 0      | 0      | .         |
| 7028     | Pseudoephedrine                          | HMDB    | Drug   | 3.020130372        | 1           | Phenethylamines      | 0      | 2      | 90-82-4   |
| 15047    | Pseudouridine                            | HMDB    | Endo   | 3.180059795        | 1           | Glycosyl Compounds   | 1      | 1      | 1445-07-4 |
| 7172     | p-Synephrine                             | HMDB    | Endo   | 0.000339988        | 1           | Phenethylamines      | 0      | 0      | 94-07-5   |

| PC_CID   | Chemical                  | Dataset | Source | Concentration (µM) | No. studies | Class                          | PubMed | Biosys | CAS                                                                                           |
|----------|---------------------------|---------|--------|--------------------|-------------|--------------------------------|--------|--------|-----------------------------------------------------------------------------------------------|
| 1045     | Putrescine                | HMDB    | Endo   | 0.213995563        | 1           | Alkylamines                    | 1      | 19     | 110-60-1                                                                                      |
| 1050     | Pyridoxal                 | HMDB    | Endo   | 0.251000587        | 1           | Pyridines and Derivatives      | 1      | 8      | 66-72-8,65-22-5                                                                               |
| 1051     | Pyridoxal 5'-phosphate    | NHANES  | Endo   | 0.051400879        | 1           | Pyridines and Derivatives      | 34     | 31     | 54-47-7,853645-22-4,52064-48-9,52441-27-7,41468-25-1                                          |
| 1052     | Pyridoxamine              | HMDB    | Endo   | 0.163998172        | 1           | Pyridines and Derivatives      | 0      | 7      | 85-87-0                                                                                       |
| 1053     | Pyridoxamine 5'-phosphate | HMDB    | Endo   | 0.003834179        | 2           | Pyridines and Derivatives      | 0      | 8      | 529-96-4                                                                                      |
| 1054     | Pyridoxine                | HMDB    | Endo   | 0.024999486        | 1           | Pyridines and Derivatives      | 53     | 7      | 65-23-6,58-56-0                                                                               |
| 32819    | Pyrocatechol              | HMDB    | Food   | 1.101640024        | 8           | Phenols and Derivatives        | 1      | 1      | 3938-16-7                                                                                     |
| 7405     | Pyroglutamic acid         | HMDB    | Endo   | 19.49971792        | 1           | Pyrrolidines                   | 3      | 7      | 98-79-3,16891-48-8,29222-42-2,312618-42-1,35255-51-7,498-91-9,6886-28-8,87430-62-4,95650-42-3 |
| 1023     | Pyrophosphate             | HMDB    | Endo   | 1.800024003        | 1           | Non-metal Oxoanionic Compounds | 0      | 274    | 2466-09-3                                                                                     |
| 880      | Pyruvaldehyde             | HMDB    | Endo   | 8.055861797        | 2           | Carbonyl Compounds             | 7      | 6      | 78-98-8,51252-84-7                                                                            |
| 1060     | Pyruvic acid              | HMDB    | Endo   | 62.12198798        | 7           | Keto-Acids and Derivatives     | 2      | 64     | 127-17-3,1892-67-7,151677-69-9                                                                |
| 5280343  | Quercetin                 | HMDB    | Food   | 0.042425741        | 2           | Flavonoids                     | 10     | 1      | 117-39-5,74893-81-5,7255-55-2,73123-10-1,849061-97-8                                          |
| 1066     | Quinolinic acid           | HMDB    | Endo   | 0.470010615        | 1           | Amino Acids and Derivatives    | 1      | 5      | 89-00-9,18970-62-2,28605-84-7,339155-13-4                                                     |
| 439242   | Raffinose                 | HMDB    | Food   | 4.799923595        | 1           | Trisaccharides                 | 0      | 1      | 512-69-6                                                                                      |
| 3001055  | Ranitidine                | HMDB    | Drug   | 7.300187261        | 1           | Furans                         | 4      | 2      | 66357-35-5,68109-63-7,66357-59-3                                                              |
| 44251266 | Resolvin D1               | HMDB    | Endo   | 0.04540196         | 1           | Fatty Acids and Conjugates     | 0      | 1      | 872993-05-0                                                                                   |
| 10473088 | Resolvin E1               | HMDB    | Endo   | 0.080467653        | 3           | Eicosanoids                    | 0      | 1      | .                                                                                             |
| 638015   | Retinal                   | HMDB    | Food   | 0.155004675        | 1           | Prenol Lipids                  | 0      | 20     | 116-31-4,472-86-6,7058-59-5                                                                   |
| 444795   | Retinoic acid             | HMDB    | Food   | 0.053852847        | 2           | Prenol Lipids                  | 25     | 15     | 302-79-4,187175-63-9,56573-65-0,7005-78-9                                                     |
| 5281877  | Retinoyl b-glucuronide    | HMDB    | Food   | 0.006599905        | 1           | Prenol Lipids                  | 0      | 1      | 401-10-5                                                                                      |
| 6440956  | Retinyl beta-glucuronide  | HMDB    | Food   | 0.006800222        | 1           | Prenol Lipids                  | 0      | 0      | 16639-19-3                                                                                    |
| 5460164  | Retinyl ester             | HMDB    | Food   | 0.09082688         | 2           | Prenol Lipids                  | 0      | 1      | .                                                                                             |



| PC_CID  | Chemical          | Dataset | Source | Concentration (µM) | No. studies | Class                                  | PubMed | Biosys | CAS                                                                                                                                                                |
|---------|-------------------|---------|--------|--------------------|-------------|----------------------------------------|--------|--------|--------------------------------------------------------------------------------------------------------------------------------------------------------------------|
| 5280531 | Retinyl palmitate | NHANES  | Food   | 0.040199529        | 1           | Fatty Acid Esters                      | 14     | 11     | 79-81-2,108066-99-5,37340-08-2,674786-07-3,7488-89-3                                                                                                               |
| 827     | Ribitol           | HMDB    | Endo   | 0.460013243        | 1           | Sugar Alcohols                         | 0      | 2      | 488-81-3                                                                                                                                                           |
| 493570  | Riboflavin        | HMDB    | Food   | 0.08916203         | 2           | Pteridines and Derivatives             | 19     | 7      | 83-88-5                                                                                                                                                            |
| 445408  | Ribothymidine     | HMDB    | Endo   | 0.200007583        | 1           | Pyrimidine Nucleosides and Analogues   | 0      | 0      | 1463-10-1                                                                                                                                                          |
| 5281792 | Rosmarinic acid   | HMDB    | Food   | 1.380022771        | 1           | Cinnamic Acid Derivatives              | 0      | 1      | 537-15-5                                                                                                                                                           |
| 10253   | Salicylic acid    | HMDB    | Drug   | 1                  | 1           | Amino Acids and Derivatives            | 0      | 6      | 487-54-7                                                                                                                                                           |
| 44257   | Sapropterin       | HMDB    | Endo   | 0.010435936        | 2           | Pteridines and Derivatives             | 0      | 2      | 62989-33-7                                                                                                                                                         |
| 153311  | Scopolamine       | HMDB    | Drug   | 0.02100069         | 1           | Phenylacetic Acid Derivatives          | 0      | 1      | 51-34-3                                                                                                                                                            |
| .       | Scyllitol         | HMDB    | Food   | 0.025998927        | 1           | Cyclic Alcohols and Derivatives        | .      | .      | .                                                                                                                                                                  |
| 1090    | Selenite          | HMDB    | Endo   | 0.001299988        | 1           | Non-metal Oxoanionic Compounds         | 0      | 2      | 14124-67-5                                                                                                                                                         |
| 6326970 | Selenium          | HMDB    | Food   | 1.480233729        | 2           | Homogeneous Other Non-metal Compounds  | 186    | 0      | 7782-49-2,7783-07-5,11125-23-8,11133-88-3,12640-29-8,12640-30-1,12641-96-2,12733-65-2,37256-19-2,37258-85-8,37276-15-6,37368-02-8,50954-17-1,51882-60-1,95788-45-7 |
| 15104   | Selenocystine     | HMDB    | Endo   | 0.073999274        | 1           | Amino Acids and Derivatives            | 0      | 0      | 1464-43-3                                                                                                                                                          |
| 105024  | Selenomethionine  | HMDB    | Endo   | 0.689974941        | 1           | Amino Acids and Derivatives            | 3      | 1      | 3211-76-5                                                                                                                                                          |
| 5202    | Serotonin         | HMDB    | Endo   | 0.84721566         | 2           | Indoles                                | 25     | 56     | 50-67-9                                                                                                                                                            |
| 68617   | Sertraline        | HMDB    | Drug   | 0.150002998        | 1           | Tetralins                              | 4      | 0      | 79617-96-2,79559-97-0                                                                                                                                              |
| 8742    | Shikimic acid     | HMDB    | Food   | 0.04797861         | 8           | Cyclic Alcohols and Derivatives        | 0      | 3      | 138-59-0                                                                                                                                                           |
| 4082203 | Silicon           | HMDB    | Pollut | 5.979877005        | 1           | Homogeneous Metalloid Compounds        | 0      | 0      | .                                                                                                                                                                  |
| 104755  | Silver            | HMDB    | Pollut | 0.006300036        | 1           | Homogeneous Transition Metal Compounds | 4      | 0      | 14701-21-4                                                                                                                                                         |
| 54454   | Simvastatin       | HMDB    | Drug   | 0.043998488        | 1           | Fatty Acid Esters                      | 157    | 0      | 79902-63-9                                                                                                                                                         |
| 6453725 | SM(d18:1/18:0)    | HMDB    | Endo   | 774.9511538        | 3           | Sphingolipids                          | 0      | 0      | 58909-84-5                                                                                                                                                         |
| 923     | Sodium            | HMDB    | Food   | 142600.173         | 1           | Homogeneous Alkali Metal Compounds     | 189    | 110    | 17341-25-2                                                                                                                                                         |
| 65727   | Solanidine        | HMDB    | Food   | 0.003179918        | 1           | Steroids and Steroid Derivatives       | 0      | 0      | 80-78-4                                                                                                                                                            |

| PC_CID   | Chemical                | Dataset | Source | Concentration (µM) | No. studies | Class                                      | PubMed | Biosys | CAS                                                                                                                                                                                                                                        |
|----------|-------------------------|---------|--------|--------------------|-------------|--------------------------------------------|--------|--------|--------------------------------------------------------------------------------------------------------------------------------------------------------------------------------------------------------------------------------------------|
| 5780     | Sorbitol                | HMDB    | Food   | 3.764443344        | 2           | Fatty Alcohols                             | 3      | 6      | 50-70-4,15060-73-8,36134-87-9,3959-53-3,63800-20-4,75398-79-7,8013-15-8,8014-89-9,8036-93-9,8042-39-5,8045-74-7,8046-05-7                                                                                                                  |
| 1102     | Spermidine              | HMDB    | Endo   | 9.339941604        | 2           | Alkylamines                                | 2      | 26     | 124-20-9                                                                                                                                                                                                                                   |
| 1103     | Spermine                | HMDB    | Endo   | 9.97019358         | 1           | Alkylamines                                | 0      | 20     | 71-44-3,115-04-8                                                                                                                                                                                                                           |
| 3126     | Sphinganine             | HMDB    | Endo   | 0.01099956         | 1           | Sphingolipids                              | 2      | 1      | 3102-56-5,13552-09-5,15639-50-6,73938-69-9,2304-75-8                                                                                                                                                                                       |
| 644260   | Sphinganine 1-phosphate | HMDB    | Endo   | 0.013000077        | 1           | Sphingolipids                              | 0      | 6      | 19794-97-9                                                                                                                                                                                                                                 |
| 5280335  | Sphingosine             | HMDB    | Endo   | 0.050001614        | 1           | Sphingolipids                              | 4      | 9      | 123-78-4,2733-29-1,475662-41-0,477243-03-1                                                                                                                                                                                                 |
| 5283560  | Sphingosine 1-phosphate | HMDB    | Endo   | 0.184833474        | 3           | Sphingolipids                              | 2      | 18     | 26993-30-6                                                                                                                                                                                                                                 |
| 638072   | Squalene                | HMDB    | Food   | 1.872922415        | 2           | Prenol Lipids                              | 5      | 4      | 111-02-4,7683-64-9,11051-27-7,21245-10-3,94016-35-0                                                                                                                                                                                        |
| 5281     | Stearic acid            | NHANES  | Endo   | 692.0097188        | 1           | Fatty Acids and Conjugates                 | 9      | 2      | 57-11-4,126539-56-8,646-29-7,134503-33-6,135152-99-7,197923-10-7,294203-07-9,39390-61-9,57485-56-0,58392-66-8,609343-71-7,68937-76-8,8013-28-3,8023-06-1,8037-40-9,8037-83-0,8039-51-8,8039-52-9,8039-53-0,8039-54-1,82497-27-6,85404-83-7 |
| 5312508  | Stearidonic acid        | HMDB    | Food   | 0.080798248        | 2           | Lineolic Acids and Derivatives             | 0      | 1      | 20290-75-9                                                                                                                                                                                                                                 |
| 6426855  | Stearoylcarnitine       | HMDB    | Food   | 0.056568669        | 2           | Fatty Acid Esters                          | 0      | 0      | 1976-27-8                                                                                                                                                                                                                                  |
| 27902    | Stearoylethanolamide    | HMDB    | Food   | 15.000747          | 1           | Fatty Amides                               | 0      | 0      | 111-57-9                                                                                                                                                                                                                                   |
| 15559396 | Stigmastanol            | HMDB    | Food   | 2.799945632        | 1           | Steroids and Steroid Derivatives           | 0      | 0      | 19466-47-8                                                                                                                                                                                                                                 |
| 104798   | Strontium               | HMDB    | Pollut | 0.359335064        | 4           | Homogeneous Alkaline Earth Metal Compounds | 0      | 0      | 22537-39-9                                                                                                                                                                                                                                 |
| 10457    | Suberic acid            | HMDB    | Endo   | 3.599878158        | 1           | Carboxylic Acids and Derivatives           | 0      | 0      | 505-48-6                                                                                                                                                                                                                                   |
| 36511    | Substance P             | HMDB    | Endo   | 3.59992E-06        | 1           | Amino Acids and Derivatives                | 6      | 1      | 33507-63-0,11035-08-8,12769-48-1                                                                                                                                                                                                           |

| PC_CID   | Chemical                          | Dataset | Source | Concentration (µM) | No. studies | Class                            | PubMed | Biosys | CAS                                                                                                                                                                                                                                                                                                                                                                 |
|----------|-----------------------------------|---------|--------|--------------------|-------------|----------------------------------|--------|--------|---------------------------------------------------------------------------------------------------------------------------------------------------------------------------------------------------------------------------------------------------------------------------------------------------------------------------------------------------------------------|
| 160419   | Succinic acid                     | HMDB    | Endo   | 14.90057794        | 3           | Carboxylic Acids and Derivatives | 1      | 8      | 56-14-4                                                                                                                                                                                                                                                                                                                                                             |
| 5312     | Succinylacetone                   | HMDB    | Endo   | 0.044157168        | 2           | Keto-Acids and Derivatives       | 0      | 0      | 51568-18-4                                                                                                                                                                                                                                                                                                                                                          |
| 5988     | Sucrose                           | HMDB    | Food   | 1.800024003        | 1           | Disaccharides                    | 11     | 14     | 57-50-1,8027-47-2,8030-20-4,85456-51-5,86101-30-6,87430-66-8,92004-84-7,12040-73-2,25702-74-3,100405-08-1,104242-10-6,131932-12-2,146054-35-5,146187-04-4,151756-02-4,220376-22-7,29253-78-9,29764-06-5,30027-72-6,47167-52-2,47185-09-1,47257-91-0,50857-68-6,51909-69-4,635681-90-2,64533-66-0,65545-99-5,75398-84-4,76056-38-7,78654-77-0,786702-63-4,80165-03-3 |
| 1117     | Sulfate                           | HMDB    | Endo   | 324.9593183        | 2           | Non-metal Oxoanionic Compounds   | 0      | 44     | 14808-79-8,18785-72-3                                                                                                                                                                                                                                                                                                                                               |
| 451489   | Sulfolithocholic acid             | HMDB    | Endo   | 1.599994193        | 1           | Steroids and Steroid Derivatives | 0      | 4      | 34669-57-3                                                                                                                                                                                                                                                                                                                                                          |
| 443113   | Sulfolithocholyglycine            | HMDB    | Endo   | 0.060000643        | 1           | Steroids and Steroid Derivatives | 0      | 0      | 15324-64-8                                                                                                                                                                                                                                                                                                                                                          |
| 5350     | Sulforaphane                      | HMDB    | Food   | 0.539992515        | 1           | Sulfoxides                       | 1      | 1      | 4478-93-7                                                                                                                                                                                                                                                                                                                                                           |
| 169148   | Symmetric dimethylarginine        | HMDB    | Endo   | 0.5346195          | 3           | Amino Acids and Derivatives      | 0      | 0      | 30344-00-4                                                                                                                                                                                                                                                                                                                                                          |
| 1123     | Taurine                           | HMDB    | Endo   | 81.49160428        | 6           | Sulfonic Acids and Derivatives   | 9      | 21     | 107-35-7,91105-79-2                                                                                                                                                                                                                                                                                                                                                 |
| 387316   | Taurochenodesoxycholic acid       | HMDB    | Endo   | 0.299991841        | 1           | Steroids and Steroid Derivatives | 0      | 12     | 516-35-8                                                                                                                                                                                                                                                                                                                                                            |
| 6675     | Taurocholic acid                  | HMDB    | Endo   | 0.37999393         | 1           | Steroids and Steroid Derivatives | 0      | 12     | 81-24-3                                                                                                                                                                                                                                                                                                                                                             |
| 68340    | Taurocyamine                      | HMDB    | Endo   | 0.367842655        | 2           | Sulfonic Acids and Derivatives   | 0      | 1      | 543-18-0                                                                                                                                                                                                                                                                                                                                                            |
| 2733768  | Taurodeoxycholic acid             | HMDB    | Endo   | 0.062001295        | 1           | Steroids and Steroid Derivatives | 0      | 0      | 516-50-7                                                                                                                                                                                                                                                                                                                                                            |
| 439763   | Tauroursodeoxycholic acid         | HMDB    | Endo   | 1.999905641        | 1           | Steroids and Steroid Derivatives | 0      | 0      | 516-90-5                                                                                                                                                                                                                                                                                                                                                            |
| 6013     | Testosterone                      | HMDB    | Endo   | 0.005345501        | 3           | Steroids and Steroid Derivatives | 493    | 17     | 58-22-0                                                                                                                                                                                                                                                                                                                                                             |
| 11197    | Tetracosanoic acid                | NHANES  | Endo   | 54.00086149        | 1           | Fatty Acids and Conjugates       | 1      | 5      | 557-59-5                                                                                                                                                                                                                                                                                                                                                            |
| 53477791 | Tetradecanoylcarnitine            | HMDB    | Endo   | 0.039999033        | 1           | Fatty Acid Esters                | 0      | 0      | 25597-07-3                                                                                                                                                                                                                                                                                                                                                          |
| 20057343 | Tetrahexosylceramide (d18:1/12:0) | HMDB    | Endo   | 1.500052339        | 1           | Tetrasaccharides                 | 0      | 0      | 11034-93-8                                                                                                                                                                                                                                                                                                                                                          |
| 1125     | Tetrahydrobiopterin               | HMDB    | Endo   | 0.00930038         | 1           | Pteridines and Derivatives       | 2      | 24     | 17528-72-2,27070-47-9                                                                                                                                                                                                                                                                                                                                               |
| 124072   | Tetrahydrocurcumin                | HMDB    | Food   | 16.00018045        | 1           | Phenols and Derivatives          | 0      | 0      | 36062-04-1                                                                                                                                                                                                                                                                                                                                                          |

| PC_CID   | Chemical                                        | Dataset | Source | Concentration (µM) | No. studies | Class                            | PubMed | Biosys | CAS        |
|----------|-------------------------------------------------|---------|--------|--------------------|-------------|----------------------------------|--------|--------|------------|
| 101771   | Tetrahydrodeoxycorticosterone                   | HMDB    | Endo   | 0.005199983        | 1           | Steroids and Steroid Derivatives | 0      | 1      | 567-03-3   |
| 5460413  | Tetrahydrofolic acid                            | HMDB    | Food   | 0.002499911        | 1           | Pteridines and Derivatives       | 0      | 12     | 135-16-0   |
| 53480481 | TG(16:0/14:0/18:1(9Z))[iso6]                    | HMDB    | Endo   | 26.99900464        | 1           | Glycerolipids                    | 0      | 0      | .          |
| 53480482 | TG(16:0/14:0/18:2(9Z,12Z))[iso6]                | HMDB    | Endo   | 20.20035139        | 1           | Glycerolipids                    | 0      | 0      | .          |
| 9543986  | TG(16:0/16:0/16:1(9Z))[iso3]                    | HMDB    | Endo   | 26.99900464        | 1           | Glycerolipids                    | 0      | 3      | .          |
| 3246953  | TG(16:0/16:0/18:0)[iso3]                        | HMDB    | Endo   | 11.59994086        | 1           | Glycerolipids                    | 0      | 3      | 2177-98-2  |
| 53480483 | TG(16:0/16:0/18:1(11Z))[iso3]                   | HMDB    | Endo   | 63.59914329        | 1           | Glycerolipids                    | 0      | 0      | .          |
| 25240356 | TG(16:0/16:0/18:2(9Z,12Z))[iso3]                | HMDB    | Endo   | 79.79812437        | 1           | Glycerolipids                    | 0      | 0      | .          |
| 25240358 | TG(16:0/16:0/18:3(9Z,12Z,15Z))[iso3]            | HMDB    | Endo   | 57.09976494        | 1           | Glycerolipids                    | 0      | 0      | .          |
| 9544062  | TG(16:0/16:0/20:1(11Z))[iso3]                   | HMDB    | Endo   | 29.60075891        | 1           | Glycerolipids                    | 0      | 3      | .          |
| 9544125  | TG(16:0/16:0/20:4(5Z,8Z,11Z,14Z))[iso3]         | HMDB    | Endo   | 90.90363597        | 1           | Glycerolipids                    | 0      | 3      | .          |
| 9544489  | TG(16:0/16:0/22:6(4Z,7Z,10Z,13Z,16Z,19Z))[iso3] | HMDB    | Endo   | 36.49955249        | 1           | Glycerolipids                    | 0      | 0      | .          |
| 9543987  | TG(16:0/16:1(9Z)/16:1(9Z))[iso3]                | HMDB    | Endo   | 20.20035139        | 1           | Glycerolipids                    | 0      | 3      | .          |
| 9544004  | TG(16:0/16:1(9Z)/18:0)[iso6]                    | HMDB    | Endo   | 63.59914329        | 1           | Glycerolipids                    | 0      | 3      | .          |
| 9544011  | TG(16:0/16:1(9Z)/18:1(9Z))[iso6]                | HMDB    | Endo   | 79.79812437        | 1           | Glycerolipids                    | 0      | 3      | .          |
| 9544021  | TG(16:0/16:1(9Z)/18:2(9Z,12Z))[iso6]            | HMDB    | Endo   | 57.09976494        | 1           | Glycerolipids                    | 0      | 3      | .          |
| 9544061  | TG(16:0/16:1(9Z)/20:0)[iso6]                    | HMDB    | Endo   | 29.60075891        | 1           | Glycerolipids                    | 0      | 3      | .          |
| 9544079  | TG(16:0/16:1(9Z)/20:1(11Z))[iso6]               | HMDB    | Endo   | 139.5049382        | 1           | Glycerolipids                    | 0      | 3      | .          |
| 9544150  | TG(16:0/16:1(9Z)/20:4(5Z,8Z,11Z,14Z))[iso6]     | HMDB    | Endo   | 31.99885113        | 1           | Glycerolipids                    | 0      | 3      | .          |
| 25240360 | TG(16:0/18:0/18:1(9Z))[iso6]                    | HMDB    | Endo   | 29.60075891        | 1           | Glycerolipids                    | 0      | 0      | .          |
| 9544069  | TG(16:0/18:0/18:2(9Z,12Z))[iso6]                | HMDB    | Endo   | 139.5049382        | 1           | Glycerolipids                    | 0      | 3      | .          |
| 9544279  | TG(16:0/18:0/20:4(5Z,8Z,11Z,14Z))[iso6]         | HMDB    | Endo   | 68.49768849        | 1           | Glycerolipids                    | 0      | 3      | .          |
| 25240174 | TG(16:0/18:1(9Z)/18:1(9Z))[iso3]                | HMDB    | Endo   | 139.5049382        | 1           | Glycerolipids                    | 0      | 0      | 27071-84-7 |
| 25240361 | TG(16:0/18:1(9Z)/18:2(9Z,12Z))[iso6]            | HMDB    | Endo   | 214.7984185        | 1           | Glycerolipids                    | 0      | 0      | .          |
| 9544199  | TG(16:0/18:1(9Z)/20:1(11Z))[iso6]               | HMDB    | Endo   | 21.50101192        | 1           | Glycerolipids                    | 0      | 3      | .          |
| 9544319  | TG(16:0/18:1(9Z)/20:4(5Z,8Z,11Z,14Z))[iso6]     | HMDB    | Endo   | 53.59737002        | 1           | Glycerolipids                    | 0      | 3      | .          |
| 25240363 | TG(16:0/18:2(9Z,12Z)/18:2(9Z,12Z))[iso3]        | HMDB    | Endo   | 90.90363597        | 1           | Glycerolipids                    | 0      | 0      | .          |
| 9544195  | TG(16:0/18:2(9Z,12Z)/20:0)[iso6]                | HMDB    | Endo   | 21.50101192        | 1           | Glycerolipids                    | 0      | 3      | .          |
| 9544231  | TG(16:0/18:2(9Z,12Z)/20:1(11Z))[iso6]           | HMDB    | Endo   | 69.10312817        | 1           | Glycerolipids                    | 0      | 3      | .          |
| 9544362  | TG(16:0/18:2(9Z,12Z)/20:4(5Z,8Z,11Z,14Z))[iso6] | HMDB    | Endo   | 36.49955249        | 1           | Glycerolipids                    | 0      | 3      | .          |
| 53480485 | TG(16:1(9Z)/14:0/18:1(11Z))[iso6]               | HMDB    | Endo   | 20.20035139        | 1           | Glycerolipids                    | 0      | 0      | .          |

| PC_CID   | Chemical                                         | Dataset | Source | Concentration (µM) | No. studies | Class         | PubMed | Biosys | CAS |
|----------|--------------------------------------------------|---------|--------|--------------------|-------------|---------------|--------|--------|-----|
| 53480488 | TG(16:1(9Z)/16:0/18:1(11Z))[iso6]                | HMDB    | Endo   | 79.79812437        | 1           | Glycerolipids | 0      | 0      | .   |
| 53480489 | TG(16:1(9Z)/16:0/18:3(9Z,12Z,15Z))[iso6]         | HMDB    | Endo   | 18.90071969        | 1           | Glycerolipids | 0      | 0      | .   |
| 9544010  | TG(16:1(9Z)/16:1(9Z)/18:0)[iso3]                 | HMDB    | Endo   | 79.79812437        | 1           | Glycerolipids | 0      | 3      | .   |
| 25240357 | TG(16:1(9Z)/16:1(9Z)/18:1(9Z))[iso3]             | HMDB    | Endo   | 57.09976494        | 1           | Glycerolipids | 0      | 0      | .   |
| 25240359 | TG(16:1(9Z)/16:1(9Z)/18:2(9Z,12Z))[iso3]         | HMDB    | Endo   | 18.90071969        | 1           | Glycerolipids | 0      | 0      | .   |
| 9544078  | TG(16:1(9Z)/16:1(9Z)/20:0)[iso3]                 | HMDB    | Endo   | 139.5049382        | 1           | Glycerolipids | 0      | 3      | .   |
| 9544099  | TG(16:1(9Z)/16:1(9Z)/20:1(11Z))[iso3]            | HMDB    | Endo   | 214.7984185        | 1           | Glycerolipids | 0      | 3      | .   |
| 9544049  | TG(16:1(9Z)/18:0/18:0)[iso3]                     | HMDB    | Endo   | 29.60075891        | 1           | Glycerolipids | 0      | 3      | .   |
| 53480490 | TG(16:1(9Z)/18:0/18:1(11Z))[iso6]                | HMDB    | Endo   | 139.5049382        | 1           | Glycerolipids | 0      | 0      | .   |
| 9544087  | TG(16:1(9Z)/18:0/18:2(9Z,12Z))[iso6]             | HMDB    | Endo   | 214.7984185        | 1           | Glycerolipids | 0      | 3      | .   |
| 9544200  | TG(16:1(9Z)/18:0/20:1(11Z))[iso6]                | HMDB    | Endo   | 21.50101192        | 1           | Glycerolipids | 0      | 3      | .   |
| 9544320  | TG(16:1(9Z)/18:0/20:4(5Z,8Z,11Z,14Z))[iso6]      | HMDB    | Endo   | 53.59737002        | 1           | Glycerolipids | 0      | 3      | .   |
| 9544083  | TG(16:1(9Z)/18:1(9Z)/18:1(9Z))[iso3]             | HMDB    | Endo   | 214.7984185        | 1           | Glycerolipids | 0      | 3      | .   |
| 25240364 | TG(16:1(9Z)/18:1(9Z)/18:2(9Z,12Z))[iso6]         | HMDB    | Endo   | 90.90363597        | 1           | Glycerolipids | 0      | 0      | .   |
| 9544196  | TG(16:1(9Z)/18:1(9Z)/20:0)[iso6]                 | HMDB    | Endo   | 21.50101192        | 1           | Glycerolipids | 0      | 3      | .   |
| 9544232  | TG(16:1(9Z)/18:1(9Z)/20:1(11Z))[iso6]            | HMDB    | Endo   | 69.10312817        | 1           | Glycerolipids | 0      | 3      | .   |
| 9544363  | TG(16:1(9Z)/18:1(9Z)/20:4(5Z,8Z,11Z,14Z))[iso6]  | HMDB    | Endo   | 36.49955249        | 1           | Glycerolipids | 0      | 3      | .   |
| 25240366 | TG(16:1(9Z)/18:2(9Z,12Z)/18:2(9Z,12Z))[iso3]     | HMDB    | Endo   | 31.99885113        | 1           | Glycerolipids | 0      | 0      | .   |
| 9544227  | TG(16:1(9Z)/18:2(9Z,12Z)/20:0)[iso6]             | HMDB    | Endo   | 69.10312817        | 1           | Glycerolipids | 0      | 3      | .   |
| 25240372 | TG(16:1(9Z)/18:2(9Z,12Z)/20:1(11Z))[iso6]        | HMDB    | Endo   | 68.49768849        | 1           | Glycerolipids | 0      | 0      | .   |
| 9544634  | TG(16:1(9Z)/20:1(11Z)/20:4(5Z,8Z,11Z,14Z))[iso6] | HMDB    | Endo   | 23.4999901         | 1           | Glycerolipids | 0      | 3      | .   |
| 53480491 | TG(18:0/14:0/16:1(9Z))[iso6]                     | HMDB    | Endo   | 26.99900464        | 1           | Glycerolipids | 0      | 0      | .   |
| 545588   | TG(18:0/14:0/18:0)[iso3]                         | HMDB    | Endo   | 11.59994086        | 1           | Glycerolipids | 0      | 0      | .   |
| 53480492 | TG(18:0/14:0/18:1(11Z))[iso6]                    | HMDB    | Endo   | 63.59914329        | 1           | Glycerolipids | 0      | 0      | .   |
| 53480494 | TG(18:0/14:0/18:2(9Z,12Z))[iso6]                 | HMDB    | Endo   | 79.79812437        | 1           | Glycerolipids | 0      | 0      | .   |
| 53480495 | TG(18:0/16:0/18:1(11Z))[iso6]                    | HMDB    | Endo   | 29.60075891        | 1           | Glycerolipids | 0      | 0      | .   |
| 53480496 | TG(18:0/16:0/18:3(9Z,12Z,15Z))[iso6]             | HMDB    | Endo   | 214.7984185        | 1           | Glycerolipids | 0      | 0      | .   |
| 25240368 | TG(18:0/18:0/18:2(9Z,12Z))[iso3]                 | HMDB    | Endo   | 21.50101192        | 1           | Glycerolipids | 0      | 0      | .   |
| 9544216  | TG(18:0/18:1(9Z)/18:2(9Z,12Z))[iso6]             | HMDB    | Endo   | 69.10312817        | 1           | Glycerolipids | 0      | 3      | .   |
| 25240370 | TG(18:0/18:2(9Z,12Z)/18:2(9Z,12Z))[iso3]         | HMDB    | Endo   | 68.49768849        | 1           | Glycerolipids | 0      | 0      | .   |
| 9544638  | TG(18:0/18:2(9Z,12Z)/20:4(5Z,8Z,11Z,14Z))[iso6]  | HMDB    | Endo   | 23.4999901         | 1           | Glycerolipids | 0      | 3      | .   |

| PC_CID   | Chemical                                          | Dataset | Source | Concentration (µM) | No. studies | Class         | PubMed | Biosys | CAS      |
|----------|---------------------------------------------------|---------|--------|--------------------|-------------|---------------|--------|--------|----------|
| 53480498 | TG(18:1(11Z)/14:0/18:1(11Z))[iso3]                | HMDB    | Endo   | 79.79812437        | 1           | Glycerolipids | 0      | 0      | .        |
| 53480500 | TG(18:1(11Z)/14:0/18:2(9Z,12Z))[iso3]             | HMDB    | Endo   | 57.09976494        | 1           | Glycerolipids | 0      | 0      | .        |
| 53480501 | TG(18:1(11Z)/16:0/18:1(11Z))[iso3]                | HMDB    | Endo   | 139.5049382        | 1           | Glycerolipids | 0      | 0      | .        |
| 53480503 | TG(18:1(11Z)/16:0/18:2(9Z,12Z))[iso3]             | HMDB    | Endo   | 214.7984185        | 1           | Glycerolipids | 0      | 0      | .        |
| 53480504 | TG(18:1(11Z)/16:0/18:3(9Z,12Z,15Z))[iso6]         | HMDB    | Endo   | 90.90363597        | 1           | Glycerolipids | 0      | 0      | .        |
| 53480505 | TG(18:1(11Z)/16:0/20:4(5Z,8Z,11Z,14Z))[iso6]      | HMDB    | Endo   | 53.59737002        | 1           | Glycerolipids | 0      | 0      | .        |
| 53480506 | TG(18:1(11Z)/16:1(9Z)/18:1(11Z))[iso3]            | HMDB    | Endo   | 214.7984185        | 1           | Glycerolipids | 0      | 0      | .        |
| 53480508 | TG(18:1(11Z)/16:1(9Z)/18:2(9Z,12Z))[iso6]         | HMDB    | Endo   | 90.90363597        | 1           | Glycerolipids | 0      | 0      | .        |
| 53480509 | TG(18:1(11Z)/18:0/18:1(11Z))[iso3]                | HMDB    | Endo   | 21.50101192        | 1           | Glycerolipids | 0      | 0      | .        |
| 53480511 | TG(18:1(11Z)/18:0/18:2(9Z,12Z))[iso6]             | HMDB    | Endo   | 69.10312817        | 1           | Glycerolipids | 0      | 0      | .        |
| 53480512 | TG(18:1(9Z)/14:0/18:1(9Z))[iso3]                  | HMDB    | Endo   | 79.79812437        | 1           | Glycerolipids | 0      | 0      | .        |
| 53480514 | TG(18:1(9Z)/14:0/20:4(5Z,8Z,11Z,14Z))[iso6]       | HMDB    | Endo   | 31.99885113        | 1           | Glycerolipids | 0      | 0      | .        |
| 53480515 | TG(18:1(9Z)/16:0/18:3(9Z,12Z,15Z))[iso6]          | HMDB    | Endo   | 90.90363597        | 1           | Glycerolipids | 0      | 0      | .        |
| 53480516 | TG(18:1(9Z)/16:0/20:2(11Z,14Z))[iso6]             | HMDB    | Endo   | 69.10312817        | 1           | Glycerolipids | 0      | 0      | .        |
| 53480517 | TG(18:1(9Z)/16:0/20:5(5Z,8Z,11Z,14Z,17Z))[iso6]   | HMDB    | Endo   | 36.49955249        | 1           | Glycerolipids | 0      | 0      | .        |
| 53480518 | TG(18:1(9Z)/16:0/22:5(7Z,10Z,13Z,16Z,19Z))[iso6]  | HMDB    | Endo   | 23.4999901         | 1           | Glycerolipids | 0      | 0      | .        |
| 53480520 | TG(18:1(9Z)/18:0/18:3(9Z,12Z,15Z))[iso6]          | HMDB    | Endo   | 68.49768849        | 1           | Glycerolipids | 0      | 0      | .        |
| 53480521 | TG(18:1(9Z)/18:1(11Z)/18:1(9Z))[iso3]             | HMDB    | Endo   | 69.10312817        | 1           | Glycerolipids | 0      | 0      | .        |
| 53480522 | TG(18:1(9Z)/18:1(11Z)/18:2(9Z,12Z))[iso6]         | HMDB    | Endo   | 68.49768849        | 1           | Glycerolipids | 0      | 0      | .        |
| 53480523 | TG(18:1(9Z)/18:1(9Z)/18:3(6Z,9Z,12Z))[iso6]       | HMDB    | Endo   | 53.59737002        | 1           | Glycerolipids | 0      | 0      | .        |
| 9544639  | TG(18:1(9Z)/18:1(9Z)/20:4(5Z,8Z,11Z,14Z))[iso3]   | HMDB    | Endo   | 23.4999901         | 1           | Glycerolipids | 0      | 3      | .        |
| 25240373 | TG(18:1(9Z)/18:2(9Z,12Z)/18:2(9Z,12Z))[iso3]      | HMDB    | Endo   | 53.59737002        | 1           | Glycerolipids | 0      | 0      | .        |
| 53480526 | TG(18:2(9Z,12Z)/14:0/18:2(9Z,12Z))[iso3]          | HMDB    | Endo   | 18.90071969        | 1           | Glycerolipids | 0      | 0      | .        |
| 53480529 | TG(18:2(9Z,12Z)/16:0/18:3(9Z,12Z,15Z))[iso6]      | HMDB    | Endo   | 31.99885113        | 1           | Glycerolipids | 0      | 0      | .        |
| 53480530 | TG(18:2(9Z,12Z)/16:0/20:2(11Z,14Z))[iso6]         | HMDB    | Endo   | 68.49768849        | 1           | Glycerolipids | 0      | 0      | .        |
| 53480533 | TG(18:2(9Z,12Z)/18:0/18:3(9Z,12Z,15Z))[iso6]      | HMDB    | Endo   | 53.59737002        | 1           | Glycerolipids | 0      | 0      | .        |
| 53480537 | TG(18:2(9Z,12Z)/18:1(9Z)/18:3(6Z,9Z,12Z))[iso6]   | HMDB    | Endo   | 36.49955249        | 1           | Glycerolipids | 0      | 0      | .        |
| 53480541 | TG(18:2(9Z,12Z)/18:1(9Z)/20:3(8Z,11Z,14Z))[iso6]  | HMDB    | Endo   | 23.4999901         | 1           | Glycerolipids | 0      | 0      | .        |
| 5322095  | TG(18:2(9Z,12Z)/18:2(9Z,12Z)/18:2(9Z,12Z))        | HMDB    | Endo   | 36.49955249        | 1           | Glycerolipids | 0      | 3      | 537-40-6 |
| 9544625  | TG(18:2(9Z,12Z)/18:2(9Z,12Z)/20:2(11Z,14Z))[iso3] | HMDB    | Endo   | 23.4999901         | 1           | Glycerolipids | 0      | 0      | .        |
| 53480549 | TG(18:3(9Z,12Z,15Z)/18:0/18:3(9Z,12Z,15Z))[iso3]  | HMDB    | Endo   | 36.49955249        | 1           | Glycerolipids | 0      | 0      | .        |

| PC_CID   | Chemical                                     | Dataset | Source | Concentration (µM) | No. studies | Class                                       | PubMed | Biosys | CAS                                                                       |
|----------|----------------------------------------------|---------|--------|--------------------|-------------|---------------------------------------------|--------|--------|---------------------------------------------------------------------------|
| 9545280  | TG(20:0/20:1(11Z)/20:4(5Z,8Z,11Z,14Z))[iso6] | HMDB    | Endo   | 0.009999702        | 1           | Glycerolipids                               | 0      | 3      | .                                                                         |
| 5429     | Theobromine                                  | HMDB    | Food   | 1.099988802        | 1           | Imidazopyrimidines                          | 0      | 2      | 83-67-0                                                                   |
| 2153     | Theophylline                                 | HMDB    | Food   | 29.00012093        | 1           | Imidazopyrimidines                          | 15     | 2      | 58-55-9,111079-49-3,46157-00-0,56645-32-0,75448-53-2                      |
| 1130     | Thiamine                                     | HMDB    | Food   | 0.107335053        | 2           | Thiamines                                   | 0      | 10     | 67-03-8,100660-17-1,115461-66-0,55463-15-5,57777-32-9,70-16-6             |
| 9322     | Thiocyanate                                  | HMDB    | Endo   | 42.84547335        | 2           | Thiocyanates                                | 11     | 2      | 302-04-5,71048-69-6                                                       |
| 1084     | Thiosulfate                                  | HMDB    | Endo   | 12.29631962        | 2           | Non-metal Oxoanionic Compounds              | 0      | 5      | 14383-50-7                                                                |
| 5280497  | Thromboxane A2                               | HMDB    | Endo   | 0.000239993        | 1           | Eicosanoids                                 | 12     | 26     | 57576-52-0                                                                |
| 5283137  | Thromboxane B2                               | HMDB    | Endo   | 0.016324308        | 10          | Eicosanoids                                 | 36     | 7      | 54397-85-2                                                                |
| 6438711  | Thromboxane B3                               | HMDB    | Endo   | 1.7E-05            | 1           | Eicosanoids                                 | 0      | 0      | 71953-80-5                                                                |
| 5789     | Thymidine                                    | HMDB    | Endo   | 0.204947793        | 2           | Pyrimidine Nucleosides and Analogues        | 14     | 11     | 50-89-5,50-88-4,157049-39-3,35902-13-7                                    |
| 6989     | Thymol                                       | HMDB    | Drug   | 0.609997756        | 1           | Prenol Lipids                               | 0      | 0      | 89-83-8                                                                   |
| 5819     | Thyroxine                                    | HMDB    | Endo   | 1.78877E-05        | 2           | Amino Acids and Derivatives                 | 146    | 18     | 51-48-9,24486-40-6,587-29-1,587-30-4,7200-84-2,74-16-8,55-03-8,25416-65-3 |
| 44237187 | Thyroxine sulfate                            | HMDB    | Endo   | 1.99756E-05        | 2           | Amino Acids and Derivatives                 | 0      | 1      | 77074-49-8                                                                |
| 22833596 | Tiglylcarnitine                              | HMDB    | Endo   | 0.040619786        | 2           | Fatty Acid Esters                           | 0      | 0      | 64191-86-2                                                                |
| 5352426  | Tin                                          | HMDB    | Pollut | 0.013000077        | 1           | Homogeneous Post-transition Metal Compounds | 3      | 0      | 7440-31-5                                                                 |
| 114942   | Titanium                                     | HMDB    | Pollut | 0.001499985        | 1           | Homogeneous Transition Metal Compounds      | 0      | 0      | 16043-45-1,77889-68-0,22541-75-9                                          |
| 1140     | Toluene                                      | NHANES  | Pollut | 0.00146032         | 3           | Aromatic Homomonocyclic Compounds           | 1      | 1      | 108-88-3                                                                  |
| 5284627  | Topiramate                                   | HMDB    | Drug   | 1.470055272        | 1           | Dioxolopyrans                               | 1      | 0      | 97240-79-4                                                                |
| 445858   | trans-Ferulic acid                           | HMDB    | Food   | 0.049075272        | 9           | Cinnamic Acid Derivatives                   | 0      | 1      | 537-98-4                                                                  |
| 12313421 | trans-Nonachlor                              | NHANES  | Pollut | 0.038300206        | 3           | Pesticides                                  | 1      | 0      | 39765-80-5,5103-73-1,24143-69-9,29555-44-0                                |
| 5558     | Tribromomethane                              | NHANES  | Pollut | 6.21217E-06        | 1           | Organobromides                              | 0      | 0      | 75-25-2                                                                   |
| 6212     | Trichloromethane                             | NHANES  | Pollut | 0.000100174        | 3           | Organochlorides                             | 0      | 0      | 67-66-3,8013-54-5                                                         |
| 17085    | Tricosanoic acid                             | HMDB    | Endo   | 0.033001575        | 1           | Fatty Acids and Conjugates                  | 0      | 0      | 2433-96-7                                                                 |

| PC_CID   | Chemical                           | Dataset | Source | Concentration (µM) | No. studies | Class                                  | PubMed | Biosys | CAS                                                                                                                                                   |
|----------|------------------------------------|---------|--------|--------------------|-------------|----------------------------------------|--------|--------|-------------------------------------------------------------------------------------------------------------------------------------------------------|
| 53477785 | Trihexosylceramide (d18:1/12:0)    | HMDB    | Endo   | 1.999905641        | 1           | Sphingolipids                          | 0      | 0      | 71965-57-6                                                                                                                                            |
| 20057314 | Trihexosylceramide (d18:1/9Z-18:1) | HMDB    | Endo   | 1.699951974        | 1           | Sphingolipids                          | 0      | 0      | 71965-57-6                                                                                                                                            |
| 1146     | Trimethylamine                     | HMDB    | Food   | 0.420000238        | 1           | Alkylamines                            | 1      | 5      | 75-50-3,13960-80-0,19530-21-3,4558-12-7                                                                                                               |
| 1145     | Trimethylamine N-oxide             | HMDB    | Food   | 37.79965592        | 1           | Organic Oxoazanium Compounds           | 1      | 4      | 1184-78-7                                                                                                                                             |
| 23964    | Tungsten                           | HMDB    | Pollut | 0.000149921        | 3           | Homogeneous Transition Metal Compounds | 0      | 1      | 7440-33-7                                                                                                                                             |
| 5610     | Tyramine                           | HMDB    | Endo   | 0.002157511        | 2           | Phenethylamines                        | 0      | 8      | 51-67-2                                                                                                                                               |
| 4462     | Ubiquinone-1                       | HMDB    | Endo   | 0.00312007         | 1           | Benzoquinones                          | 0      | 12     | 727-81-1                                                                                                                                              |
| 1174     | Uracil                             | HMDB    | Endo   | 0.597500595        | 2           | Diazines                               | 5      | 23     | 66-22-8,51953-14-1,51953-19-6,766-19-8,138285-60-6,144104-68-7,153445-42-2,16908-84-2,24897-50-5,42910-77-0,4433-21-0,4433-24-3,66224-60-0,66255-05-8 |
| 1176     | Urea                               | HMDB    | Endo   | 5175.027851        | 4           | Ureas                                  | 57     | 24     | 57-13-6,173144-80-4,173994-65-5,174693-33-5,175276-38-7,30535-50-3,37955-36-5,4744-36-9,860639-56-1                                                   |
| 1175     | Uric acid                          | HMDB    | Endo   | 317.0628439        | 8           | Imidazopyrimidines                     | 569    | 18     | 69-93-2,13154-20-6,33278-42-1,34318-07-5,42911-25-1,42911-27-3,42911-28-4,530-13-2                                                                    |
| 6029     | Uridine                            | HMDB    | Endo   | 3.109929322        | 2           | Pyrimidine Nucleosides and Analogues   | 1      | 15     | 58-96-8,12693-39-9,21231-59-4                                                                                                                         |
| 6031     | Uridine 5'-diphosphate             | HMDB    | Endo   | 41.00114528        | 1           | Pyrimidine Nucleotides                 | 0      | 69     | 58-98-0                                                                                                                                               |
| 6030     | Uridine 5'-monophosphate           | HMDB    | Endo   | 183.9934207        | 1           | Pyrimidine Nucleotides                 | 0      | 60     | 58-97-9,27416-86-0,53624-79-6,81795-92-8                                                                                                              |
| 8629     | Uridine diphosphate glucose        | HMDB    | Endo   | 154.9961069        | 1           | Pyrimidine Nucleotides                 | 0      | 9      | 133-89-1                                                                                                                                              |
| 736715   | Urocanic acid                      | HMDB    | Endo   | 0.42998713         | 1           | Azoles                                 | 0      | 5      | 104-98-3                                                                                                                                              |
| 72424    | Uroporphyrin I                     | HMDB    | Endo   | 0.012000584        | 1           | Tetrapyrroles and Derivatives          | 0      | 1      | 607-14-7                                                                                                                                              |
| 31401    | Ursodeoxycholic acid               | HMDB    | Endo   | 0.159997034        | 1           | Steroids and Steroid Derivatives       | 9      | 0      | 128-13-2,50809-41-1,80225-86-1                                                                                                                        |
| 21252318 | Ursodeoxycholic acid 3-sulfate     | HMDB    | Endo   | 2.68693194         | 2           | Steroids and Steroid Derivatives       | 0      | 0      | 68780-73-4                                                                                                                                            |
| 7991     | Valeric acid                       | HMDB    | Food   | 0.600015374        | 1           | Fatty Acids and Conjugates             | 0      | 0      | 109-52-4                                                                                                                                              |



| PC_CID   | Chemical               | Dataset | Source | Concentration (µM) | No. studies | Class                                  | PubMed | Biosys | CAS                                                                                                                                                                                                                 |
|----------|------------------------|---------|--------|--------------------|-------------|----------------------------------------|--------|--------|---------------------------------------------------------------------------------------------------------------------------------------------------------------------------------------------------------------------|
| 53481619 | Valeryl carnitine      | HMDB    | Food   | 0.1400018          | 1           | Fatty Acid Esters                      | 0      | 0      | .                                                                                                                                                                                                                   |
| 3121     | Valproic acid          | HMDB    | Drug   | 207.9920796        | 1           | Fatty Acids and Conjugates             | 10     | 2      | 99-66-1                                                                                                                                                                                                             |
| 23990    | Vanadium               | HMDB    | Pollut | 0.000884401        | 3           | Homogeneous Transition Metal Compounds | 1      | 0      | 7440-62-2,22537-31-1,13966-93-3,195161-77-4,22541-77-1,24763-58-4                                                                                                                                                   |
| 8468     | Vanillic acid          | HMDB    | Food   | 0.41765481         | 9           | Benzoic Acid and Derivatives           | 0      | 0      | 121-34-6                                                                                                                                                                                                            |
| 1183     | Vanillin               | HMDB    | Food   | 6.387225627        | 8           | Phenols and Derivatives                | 0      | 2      | 121-33-5                                                                                                                                                                                                            |
| 1245     | Vanillylmandelic acid  | HMDB    | Endo   | 0.035000253        | 1           | Phenols and Derivatives                | 2      | 2      | 55-10-7,2394-20-9                                                                                                                                                                                                   |
| 10805    | Vanylglycol            | HMDB    | Endo   | 0.020795888        | 2           | Phenols and Derivatives                | 3      | 3      | 534-82-7,67423-45-4                                                                                                                                                                                                 |
| 8230     | Vasopressin            | HMDB    | Endo   | 5.30002E-06        | 1           | Peptides                               | 12     | 2      | 113-79-1                                                                                                                                                                                                            |
| 5656     | Venlafaxine            | HMDB    | Drug   | 1.999905641        | 1           | Phenols and Derivatives                | 4      | 0      | 93413-69-5,93413-44-6                                                                                                                                                                                               |
| 445354   | Vitamin A              | NHANES  | Food   | 1.909611847        | 1           | Prenol Lipids                          | 193    | 19     | 68-26-8,11103-57-4,13123-33-6,1341-18-0,1406-67-3,17104-91-5,53637-36-8,5979-23-7                                                                                                                                   |
| 54670067 | Vitamin C              | NHANES  | Food   | 56.09799095        | 1           | Dihydrofurans                          | 189    | 18     | 50-81-7,89924-69-6,129940-97-2,14536-17-5,154170-90-8,259133-78-3,30208-61-8,50976-75-5,56172-55-5,56533-05-2,57304-74-2,57606-40-3,623158-95-2,6730-29-6,882690-91-7,884381-69-5,885512-24-3,88845-26-5,53262-66-1 |
| 5280795  | Vitamin D3             | HMDB    | Food   | 0.020213593        | 2           | Prenol Lipids                          | 461    | 13     | 67-97-0,1406-16-2                                                                                                                                                                                                   |
| 5280483  | Vitamin K1             | HMDB    | Food   | 0.002525794        | 2           | Prenol Lipids                          | 45     | 3      | 84-80-0,12001-79-5,10485-69-5,15973-57-6,27696-10-2,50926-17-5,11104-38-4                                                                                                                                           |
| 91577    | Vitamin K1 2,3-epoxide | HMDB    | Food   | 2.09994E-06        | 1           | Prenol Lipids                          | 0      | 5      | 25486-55-9                                                                                                                                                                                                          |
| 1188     | Xanthine               | HMDB    | Endo   | 0.994813497        | 7           | Imidazopyrimidines                     | 0      | 15     | 69-89-6,16819-86-6,51953-26-5,28522-58-9,33669-67-9,42911-15-9,6050-36-8                                                                                                                                            |
| 1189     | Xanthosine             | HMDB    | Endo   | 5.079942791        | 1           | Purine Nucleosides and Analogues       | 0      | 4      | 146-80-5                                                                                                                                                                                                            |
| 5699     | Xanthurenic acid       | HMDB    | Endo   | 0.022000282        | 1           | Amino Acids and Derivatives            | 0      | 2      | 59-00-7                                                                                                                                                                                                             |

| PC_CID  | Chemical      | Dataset | Source | Concentration ( $\mu\text{M}$ ) | No. studies | Class                                  | PubMed | Biosys | CAS        |
|---------|---------------|---------|--------|---------------------------------|-------------|----------------------------------------|--------|--------|------------|
| 5280899 | Zeaxanthin    | HMDB    | Food   | 0.035778791                     | 2           | Prenol Lipids                          | 14     | 2      | 144-68-3   |
| 32051   | Zinc (II) ion | HMDB    | Food   | 6.454644828                     | 6           | Homogeneous Transition Metal Compounds | 0      | 133    | 23713-49-7 |
| 115139  | Zirconium     | HMDB    | Pollut | 0.002634926                     | 2           | Homogeneous Transition Metal Compounds | 0      | 0      | 7440-67-7  |
